# Supplementary material for: Behavioural interventions change individual transport choices but have a limited impact on transport mode split. Evidence from a systematic review
Source: Research Square preprint supplement (doi:10.21203/rs.3.rs-2084989/v1), 2022-11-02
Supplement: Supplementary file 1 [file 064f6f36b6dd48f64c2f94ab.xlsx]

## Sheet: 1st details
#	ref	project reference	Article ref	Article	Mode type	Comments
1	14	Stepchange pilot	Cairns et al (2004)
2	14	Enﬁeld TfL pilot	Cairns et al (2004)	72,
3	14	Holland Park	Ker (2003); Cairns et al (2004)		car use
4	14	Dulwich	Ker (2003)
5	14	Liverpool	Ker (2003)
6	14	Reggio Emilia	Ker (2003)
7	14	Porto	Ker (2003)
8	14	Kassel	Ker (2003)
9	14	Luxembourg	Ker (2003)
10	14	Stuttgart-Freiberg	Ker (2003)
11	14	Marangaroo	Cairns et al (2004)	James B (2003c) Update on the TravelSmart programme in Perth Western Australia unpublished paper
12	14	South Perth	Ker (2003)
13	14	Bern A	Ker (2003)
14	14	Frome	Ker (2003)	Sustrans 2002
15	14	Oslo	Ker (2003)
16	14	Christies Beach	Ker (2003)
17	14	Lisbon	Ker (2003)
18	14	Copenhagen A	Ker (2003)
19	14	York (12 h day)	Cairns et al (2004)	York, 2002
20	14	Cologne	Ker (2003)
21	14	Linz	Ker (2003)
22	14	Lisbon	Ker (2003)
23	14	Wiesbaden	Ker (2003)
24	14	East Hampshire 2003	Cairns et al (2004)	(TAPESTRY 2003)
25	14	Bishopsworth/ Hartcliffe project I	Cairns et al (2004)
26	14	Quedgeley pilot	Cairns et al (2004)
27	14	Arnhem	Ker (2003)
28	14	Munich	Ker (2003)
29	14	Cambridge (UK)	Cairns et al (2004)
30	14	Bremen (Germany)	Ker (2003)
31	14	Salzburg (Austria)	Ker (2003)
32	14	Bishopston (UK)	Cairns et al (2004)
33	14	Borken (Germany)	Ker (2003)
34	14	Delft/Den Haag (Netherlands)	Ker (2003)
35	14	Halle (Germany)	Ker (2003)
36	14	Armandale (UK)	Cairns et al (2004)
37	14	Frementle (France)	Cairns et al (2004)
38	14	Bristol VIVALDI phase 1 (UK)	Cairns et al (2004)
39	14	Helsinki (Finland)	Ker (2003)
40	14	Gloucester (UK)	Ker (2003)
41	14	Montpellier (France)	Ker (2003)
42	14	Pinneberg (Germany)	Ker (2003)
43	14	Leipzig (Germany)	Ker (2003)
44	14	Magdeburg (Germany)	Ker (2003)
45	14	Hannover-Südstadt (Germany)	Ker (2003)
46	14	York (morning peak) (UK)	Cairns et al (2004)
47	14	Liverpool (UK)	Ker (2003)
48	14	Quedgeley large scale 2004 (2)	Cairns et al (2004)
49	14	Frome pilot (UK)	Cairns et al (2004)	Sustrans 2002
50	14	Melville (Australia)	Cairns et al (2004)
51	14	Bern B (Swiss)	Ker (2003)
52	14	Ludwigshafen (Germany)	Ker (2003)
53	14	Subiaco (Australia)	Cairns et al (2004)
54	14	Brisbane (Australia)	Ker (2003)
55	14	Nürnberg (Germany)	Ker (2003)	Richter, Jochen, Margareta Friman, and T. Gärling. "Review of evaluations of soft transport policy measures." Transportation: Theory and application 2.1 (2010): 5-18.
56	14	Vincent (Australia)	Cairns et al (2004)
57	14	South Perth (Australia)	Cairns et al (2004)	Brög (2002)
58	14	Venice (Italy)	Ker (2003)
59	14	Vollmar (Germany)	Ker (2003)
60	14	Bologna (Italy)	Ker (2003)
61	14	Gloucester largescale (UK)	Cairns et al (2004)
62	14	Gloucester pilot (UK)	Cairns et al (2004)
63	14	Madrid (Spain)	Ker (2003)
64	14	Baunatal (Germany)	Ker (2003)
65	14	Bristol Bishopston (UK)	Cairns et al (2004)
66	14	Hampshire (UK)	Cairns et al (2004)
67	14	Kingston TfL pilot (UK)	Cairns et al (2004)	Kirby T (2002) Kingston upon Hull: the 20mph city. Speeds for people conference, November 2002
68	14	Turin (Italy)	Ker (2003)
69	14	Parma (Italy)	Ker (2003)
70	14	Southwark TfL pilot (UK)	Cairns et al (2004)
71	14	Buckinghamshire County (UK)	Cairns et al (2004)
72	14	Bike Busters (UK)	Cairns et al (2004)
73	14	Boots (UK)	Cairns et al., (2010)		car use
74	14	Oxford Radcliffe Hospitals NHS Trust (UK)	Cairns et al., (2010)		car use
75	14	Stockley Park (UK)	Cairns et al., (2010)		car use
76	14	Agilent Technologies (UK)	Cairns et al., (2010)		car use
77	14	Government Office for the East Midlands	Cairns et al., (2010)		car use
78	14	Pfizer	Cairns et al., (2010)		car use
79	14	Egg (UK)	Cairns et al., (2010)		car use
80	14	University of Bristol (UK)	Cairns et al., (2010)		car use
81	14	Vodafone (UK)	Cairns et al., (2010)		car use
82	14	AstraZeneca (UK)	Cairns et al., (2010)		car use
83	14	Nottingham City Hospital NHS Trust (UK)	Cairns et al., (2010)		car use
84	14	Wycombe District Council (UK)	Cairns et al., (2010)		car use
85	14	BP (UK)	Cairns et al., (2010)		car use
86	14	Addenbrooke’s NHS Trust	Cairns et al., (2010)		car use
87	14	Buckinghamshire County Council (UK)	Cairns et al., (2010)		car use
88	14	Orange (Almondsbury Park) (UK)	Cairns et al., (2010)		car use
89	14	Computer Associates (UK)	Cairns et al., (2010)		car use
90	14	Marks and Spencer Financial Services (UK)	Cairns et al., (2010)		car use
91	14	Plymouth Hospitals NHS Trust (UK)	Cairns et al., (2010)		car use
92	14	HM Prison (UK)	Cairns et al (2004)
93	14	Buckinghamshire (2)	Cairns et al (2004)
94	14	Bluewater	Cairns et al., (2010)
95	14	Royal Orthopaedic Hospital (UK)	Cairns et al (2004)
96	14	Compass Group (UK)	Cairns et al (2004)
97	14	Local Government Ombudsman (UK)	Cairns et al (2004)
98	14	Generics (UK)	Cairns et al (2004)
99	14	St Helen’s College (UK)	Cairns et al (2004)
100	14	Northﬁeld Medical Centre (UK)	Cairns et al (2004)
101	14	The Priory Hospital (UK)	Cairns et al (2004)
102	14	Buckinghamshire (UK)	Cairns et al (2004)
103	14	Chamber of Commerce (UK)	Cairns et al (2004)
104	14	Orange (Temple Point)	Cairns et al., (2010)
105	14	Cambridgeshire County Council (UK)	Cairns et al (2004)
106	14	Gov. Ofﬁce for East of England (UK)	Cairns et al (2004)
107	14	ARUP (UK)	Cairns et al (2004)
108	14	City council Transport. Department (UK)	Cairns et al (2004)
109	14	University of Bristol (UK)	Cairns et al (2004)
110	14	Cambridge City Council (UK)	Cairns et al (2004)
111	14	WS Atkins (UK)	Cairns et al (2004)
112	14	Economic Develop. Depart. City (UK)	Cairns et al (2004)
113	14	The Dental Hospital (UK)	Cairns et al (2004)
114	14	Cambridge University (UK)	Cairns et al (2004)
115	14	Orange (UK)	Cairns et al (2004)
116	14	Norwich Union (UK)	Cairns et al (2004)
117	14	Lancashire—primary schools (UK)	GORS (2005)
118	14	Redcar and Cleveland—primary schools (UK)	GORS (2005)
119	14	Thurrock—primary schools (UK)	GORS (2005)
120	14	Wrexham secondary (UK)	Steer Davies Gleave (2003a, 2003b)
121	14	Bedfordshire—lower school (UK)	GORS (2005)
122	14	Bedfordshire—middle school (UK)	GORS (2005)
123	14	Marlow CE Infant (UK)	Cairns et al (2004)
124	14	Runnymede Secondary (UK)	Steer Davies Gleave (2003a, 2003b)
125	14	Bracknell Forest—primary school (UK)	GORS (2005)
126	14	Leeds—primary schools (UK)	GORS (2005)
127	14	Shropshire—secondary schools (UK)	GORS (2005)
128	14	Telford & Wrekin—primary school (UK)	GORS (2005)
129	14	Hartlepool—primary school—March (UK)	GORS (2005)
130	14	Lancashire—urban secondary schools (UK)	GORS (2005)
131	14	Wrexham Post 16 (UK)	Steer Davies Gleave (2003a, 2003b)
132	14	Stockport—primary schools (UK)	GORS (2005)
133	14	Shropshire—primary schools (UK)	GORS (2005)
134	14	Hebden bridge primary (UK)	Steer Davies Gleave (2003a, 2003b)
135	14	Redcar & Cleveland—secondary (UK)	GORS (2005)
136	14	Wrexham primary (UK)	Steer Davies Gleave (2003a, 2003b)
137	14	Little Kingshill Combined (UK)	Cairns et al (2004)
138	14	West Wycombe Combined (UK)	Cairns et al (2004)
139	14	Holy Trinity CE (UK)	Cairns et al (2004)
140	14	John Hampden Infant (UK)	Cairns et al (2004)
141	14	Holmer Green Infant (UK)	Cairns et al (2004)
142	15	21 primary schools in boroughs of Camden and Islington	Rowland et al., 2003	Rowland, D., DiGuiseppi, C., Gross, M., Afolabi, E., & Roberts, I. (2003). Randomised controlled trial of site specific advice on school travel patterns. Archives of disease in childhood, 88(1), 8-11.
143	15	public primary schools (n=61) located in the inner west of Sydney	Wen et al., 2008	Wen, L. M., Fry, D., Merom, D., Rissel, C., Dirkis, H., & Balafas, A. (2008). Increasing active travel to school: are we on the right track? A cluster randomised controlled trial from Sydney, Australia. Preventive medicine, 47(6), 612-618.
144	15	Two primary schools in Scotland	Mckee et al., 2007	McKee, R., Mutrie, N., Crawford, F., & Green, B. (2007). Promoting walking to school: results of a quasi-experimental trial. Journal of Epidemiology & Community Health, 61(9), 818-823.
145	15	walking school bus (WSB) program on student transport in a low-income, urban neighborhood (Three public elementary schools)	Mendoza et al., 2009	Mendoza, J. A., Levinger, D. D., & Johnston, B. D. (2009). Pilot evaluation of a walking school bus program in a low-income, urban community. BMC public health, 9(1), 1-7.
146	15	Bracknell Forest	Bracknell Forest	Macmillan, A. K., Hosking, J., Connor, J. L., Bullen, C., & Ameratunga, S. (2013). A Cochrane systematic review of the effectiveness of organisational travel plans: Improving the evidence base for transport decisions. Transport policy, 29, 249-256.
147	15	Lancashire	Lancashire	Macmillan, A. K., Hosking, J., Connor, J. L., Bullen, C., & Ameratunga, S. (2013). A Cochrane systematic review of the effectiveness of organisational travel plans: Improving the evidence base for transport decisions. Transport policy, 29, 249-256.
148	15	Redcar & Cleveland	Redcar & Cleveland	Macmillan, A. K., Hosking, J., Connor, J. L., Bullen, C., & Ameratunga, S. (2013). A Cochrane systematic review of the effectiveness of organisational travel plans: Improving the evidence base for transport decisions. Transport policy, 29, 249-256.
149	15	Telford & Wrekin	Telford & Wrekin	Macmillan, A. K., Hosking, J., Connor, J. L., Bullen, C., & Ameratunga, S. (2013). A Cochrane systematic review of the effectiveness of organisational travel plans: Improving the evidence base for transport decisions. Transport policy, 29, 249-256.
150	15	TAPESTRY 2003 Dublin--(Porter, 2003)	TAPESTRY 2003 Dublin--(Porter, 2003)	Tapestry European Union Campaign Solutions for Transport, Dublin, Ireland (2003)
151	15	TAPESTRY 2003 Herts--(Rumble, 2003)	TAPESTRY 2003 Herts--(Rumble, 2003)	Rumble, J., 2003. “Targeting the Environmentally Aware” United Kingdom. Tapestry European Union Campaign Solutions for Transport.
152	15	Walk in to Work Out	Mutrie et al., 2002	Mutrie, N., Carney, C., Blamey, A., Crawford, F., Aitchison, T., & Whitelaw, A. (2002). “Walk in to Work Out”: a randomised controlled trial of a self help intervention to promote active commuting. Journal of Epidemiology & Community Health, 56(6), 407-412.
153	15	Sargeant et al., 2004--Addenbrooke	Sargeant et al., 2004--Addenbrooke	Sargeant, J., Carter, T., Mcsweeney, S. Hughes, W., 2004. Cambridgeshire Travel Choice Project. Final Report. Cambridge, UK: UK Department for Transport, Cambridgeshire County Council, Cambridge University Hospitals NHS Foundation Trust, Cambridgeshire Travel for Work Partnership.
154	15	Sargeant et al., 2004--Council CarPark	Sargeant et al., 2004--Council CarPark	Sargeant, J., Carter, T., Mcsweeney, S. Hughes, W., 2004. Cambridgeshire Travel Choice Project. Final Report. Cambridge, UK: UK Department for Transport, Cambridgeshire County Council, Cambridge University Hospitals NHS Foundation Trust, Cambridgeshire Travel for Work Partnership.
155	15	Sargeant et al., 2004--Council New Recruit	Sargeant et al., 2004--Council New Recruit	Sargeant, J., Carter, T., Mcsweeney, S. Hughes, W., 2004. Cambridgeshire Travel Choice Project. Final Report. Cambridge, UK: UK Department for Transport, Cambridgeshire County Council, Cambridge University Hospitals NHS Foundation Trust, Cambridgeshire Travel for Work Partnership.
156	15	Denver Experiment	Atherton et al., 1982	Atherton, T. J., Scheuernstuhl, G. J., & Hawkins, D. (1982). Transportation-Related Impacts of Compressed Workweek: The Denver Experiment. Tra nsportation Research Record: Journal of the Transportation Research Board, 845, 22-30.
157	15	Florida State University carpooling experiment	Jacobs et al., 1982	Jacobs, H. E., Fairbanks, D., Poche, C. E., & Bailey, J. S. (1982). Multiple incentives in encouraging car pool formation on a university campus. Journal of Applied Behavior Analysis, 15(1), 141-149.	carpool
158	15	ecotravel coordinator program	Nakayama et al., 2005	Nakayama, S., & Takayama, J. I. (2005). Ecotravel coordinator program: Effects on travel behavior and environmental attitude. Transportation research record, 1924(1), 224-230.
159	12	Stockholm obesity intervention	Hemmingsson	Hemmingsson, E., Udden, J., Neovius, M., & Rossner, S. (2009). Increased physical activity in abdominally obese women through support for changed commuting habits: A randomized clinical trial. International Journal of Obesity, 33, 645–652. doi:10.1038/ijo.2009.77	walking and cycling
160	12	Pedometer-Based Intervention	Butler	Butler, L., Furber, S., Phongsavan, P., Mark, A., & Bauman, A. (2009). Effects of a pedometer-based intervention on physical activity levels after cardiac rehabilitation. Journal of Cardiopulmonary Rehabilitation and Prevention, 29, 105–114.	walking and cycling
161	12	The Braveheart Project	Coull	Coull A. J., Taylor V. H., Elton R., Murdoch P. S., & Hargreaves A. D. (2004). A randomized controlled trial of senior lay health mentoring n older people with ischemic heart disease: The Braveheart Project. Age and Ageing, 33, 348–354. doi:10.1093/ageing/afh098	walking, physical activity
162	12	Halbert (2000)	Halbert (2000)	Halbert J. A., Silagy C. A., Finucane P. M., Withers R. T., & Hamdorf P. A. (2000). Physical activity and cardiovascular risk factors: Effects of advice from an exercise specialist in Australian general practice. Medical Journal of Australia, 173, 84–87.	walking and cycling
163	12	Walk in to Work Out	Mutrie	Mutrie, N., Carney, C., Blamey, A., Crawford, F., Aitchison, T., & Whitelaw, A. (2002). “Walk in to Work Out”: a randomised controlled trial of a self help intervention to promote active commuting. Journal of Epidemiology & Community Health, 56(6), 407-412.	walking and cycling
164	12	general practice education programme	Kerse	Kerse N. M., Flicker L., Jolley D., Arroll B., & Young D. (1999). Improving the health behaviours of elderly people: Randomised controlled trial of a general practice education programme. British Medical Journal, 319, 683–687. doi:10.1136/bmj.319.7211.683	walking and cycling
165	12	Calfas	Calfas	Calfas K. J., Long B. J., Sallis J. F., Wooten W. J., Pratt M., & Patrick K. (1996). A controlled trial of physician counseling to promote the adoption of physical activity. Preventive Medicine: An International Journal Devoted to Practice and Theory, 25, 225–233. doi:10.1006/pmed.1996.0050	walking and cycling
166	12	Prestwich (Plan)	Prestwich (Plan)		walking and cycling
167	12	Prestwich (Goal)	Prestwich (Goal)		walking and cycling
168	12	Baker et al. 2008	Baker		walking
169	12	Gilson (Routes)	Gilson (Routes)		walking and cycling
170	12	Gilson (Tasks))	Gilson (Tasks))		walking and cycling
171	12	Calfas	Napolitano		walking and cycling
172	12	SHAPE trials	Fisher	Fisher K. J., Pickering M. A., & Li F. (2002). Healthy ageing through active leisure: Design and methods of SHAPE—a randomized controlled trial of a neighborhood project. World Leisure Journal, 44, 19–28. doi:10.1080/04419057.2002.9674257	walking and cycling
173	12	Pedometer trial	Merom (WPP)	Merom D., Rissel C., Phongsavan P., Smith B. J., van Kemende C., Brown W. J., & Bauman A. E. (2007). Promoting walking with pedometers in the community: The Step-by-Step Trial. American Journal of Preventive Medicine, 32, 290–297. doi:10.1016/j.amepre.2006.12.007	walking and cycling
174	12	Kriska	Kriska	Kriska A. M., Bayles C., Cauley J. A., LaPorte R. E., Sandler R. B., & Pambianco G. (1986). A randomized exercise trial in older women: Increased activity over two years and the factors associated with compliance. Medicine & Science in Sports & Medicine, 18, 557–562.	walking and cycling
175	12	telephone counseling intervention	Nies	Nies M. A., Chruscial H. L., & Hepworth J. T. (2003). An intervention to promote walking in sedentary women in the community. American Journal of Health Behavior, 27, 524–535. doi:10.5993/AJHB.27.5.4	walking and cycling
176	12	telephone to walk	Jarvis	Jarvis K. L., Friedman R. H., Heerna T., & Cullinane P. M. (1997). Older women and physical activity: Using the telephone to walk. Women’s Health Issues, 7, 24–29. doi:10.1016/S1049-3867(96)00050-3	walking and cycling
177	12	pedometers to increase physical activity: a pilot study	Pal	Pal S., Cheng C., Egger G., Binns C., & Donovan R. (2009). Using pedometers to increase physical activity in overweight and obese women: A pilot study. BMC Public Health, 9, 309. doi:10.1186/1471-2458-9-309	walking and cycling
178	12	Norris	Norris	Norris S. L., Grothaus L. C., Buchner D. M., & Pratt M. (2000). Effectiveness of physician-based assessment and counseling for exercise in a staff model HMO. Preventive Medicine: An International Journal Devoted to Practice and Theory, 30, 513–523. doi:10.1006/pmed.2000.0673	walking and cycling
179	12	Pereira	Pereira	Pereira M. A., Kriska A. M., Day R. D., Cauley J. A., LaPorte R. E., & Kuller L. H. (1998). A randomized walking trial in postmenopausal women: Effects on physical activity and health 10 years later. Archives of Internal Medicine, 158, 1695–1701. doi:10.1001/archinte.158.15.1695	walking and cycling
180	12	Halbert (2001)	Halbert (2001)	Halbert J., Crotty M., Weller D., Ahern M., & Silagy C. (2001). Primary care-based physical activity programs: Effectiveness in sedentary older patients with osteoarthritis symptoms. Arthritis Care and Research, 45, 228–234. doi:10.1002/1529-0131(200106)45:3	walking and cycling
181	12	home‐based pedometer‐driven walking program	Talbot	Talbot L. A., Gaines J. M., Huynh T. N., & Metter E. J. (2003). A home-based pedometer-driven walking program to increase physical activity in older adults with osteoarthritis of the knee: A preliminary study. Journal of the American Geriatrics Society, 51, 387–392. doi:10.1046/j.1532-5415.2003.51113.x	walking and cycling
182	12	Ferreira (N)	Ferreira (N)	Ferreira M., Matsudo S., Matsudo V., & Braggion G. (2005). Effects of an intervention program of physical activity and nutrition orientation on the physical activity level of physically active women aged 50 to 72 years old. Revista Brasileira de Medicina do Esporte, 11, 166e–169e.	walking and cycling
183	12	Tudor-Locke	Tudor-Locke	Tudor-Locke C., Bell R., Myers A., Harris S., Ecclestone N., Lauzon N., & Roger N. W. (2004). Controlled outcome evaluation of the First Step Program: A daily physical activity intervention for individuals with type II diabetes. International Journal of Obesity, 28, 113–119. doi:10.1038/sj.ijo.0802485	walking and cycling
184	12	Pedometer-Based Physical Activity Program	Croteau	Croteau K. A., Richeson N. E., Vines S. W., & Jones D. B. (2004). Effects of a pedometer-based physical activity program in older adults’ mobility-related self-efficacy and physical performance. Activities, Adaptation, & Ageing, 28, 19–33. doi:10.1300/J016v28n02_02	walking and cycling
185	12	Brownson (2005)	Brownson (2005)	Brownson R. C., Hagood L., Lovegreen S. L., Britton B., Caito N. M., Elliott M. B., et al. Tune D. (2005). A multilevel ecological approach to promoting walking in rural communities. Preventive Medicine: An International Journal Devoted to Practice and Theory, 41, 837–842. doi:10.1016/j.ypmed.2005.09.004	walking and cycling
186	12	Community-Based trial	Brownson (2004)	Brownson R. C., Baker E. A., Boyd R. L., Caito N. M., Duggan K., Housemann R. A., et al. Walton D. (2004). A community-based approach to promoting walking in rural areas. American Journal of Preventive Medicine, 27, 28–34. doi:10.1016/j.amepre.2004.03.015	walking and cycling
187	12	Car-share	Cervero	Cervero R., & Tsai Y.-H. (2003). San Francisco City CarShare: Travel demand trends and second year impacts (Working Paper 2003-05). Berkeley, CA: Institute of Urban and Regional Development, University of California at Berkeley	walking and cycling
188	12	Travelsmart suburbs Brisbane	Marinelli	Marinelli P., & Roth M. (2002). Travelsmart suburbs Brisbane—a successful pilot of a voluntary travel behavior change technique. Canberra, Australia: 25th Australasian Transport Research Forum.	walking and cycling
189	12	Socialdata (Perth)	Socialdata (Perth)		walking and cycling
190	12	Socialdata (Melville)	Socialdata (Melville)		walking and cycling
191	12	Sustrans (Lancashire)	Sustrans (Lancashire)		walking and cycling
192	12	Sustrans (Nottingham)	Sustrans (Nottingham)		walking and cycling
193	12	Sustrans (Sheffield)	Sustrans (Sheffield)		walking and cycling
194	12	Sustrans (Gloucester)	Sustrans (Gloucester)		walking and cycling
195	12	Sustrans (Bristol)	Sustrans (Bristol)		walking and cycling
196	12	Sustrans (Cramlington)	Sustrans (Cramlington)		walking and cycling
197	12	Sustrans (Doncaster)	Sustrans (Doncaster)		walking and cycling
198	12	Wilmink	Wilmink	Wilmink A., & Hartman J. (1987). Evaluation of the Delft bicycle network plan: Final summary report. The Hague, Netherlands: Ministry of Transport and Public Works.	walking and cycling
199	12	TAPESTRY	TAPESTRY		walking and cycling
200	12	Haq	Haq	Haq G., Whitelegg J., Cinderby S., & Johnson D. (2004). Intelligent travel: Personalized travel planning in the city of York. Stockholm, Sweden: Stockholm Environment Institute.	walking and cycling
201	16	ABC	ABC	A Better City (ABC). (2014). Establishing an effective commute trip reduction policy in Massachusetts. Boston, MA: Author.
202	16	Addison & Associates,	Addison & Associates,	Addison & Associates. (2008). Delivering travel plans through the planning process – research report. London: Department for Transport and Communities and Local Government.
203	16	City and County of San Francisco,	City and County of San Francisco,
204	16	City and County of San Francisco,	City and County of San Francisco,
205	16	Copsey, S. (2012).	Copsey, S. (2012).	Copsey, S. (2012). The development and implementation processes of a travel plan within the context of a large organisation: Using an embedded case study approach (PhD thesis). University of Hertfordshire.
206	16	De Gruyter, C. (2017)	De Gruyter, C. (2017)	De Gruyter, C. (2017). Travel plans for new residential developments: Insights from theory and practice. Singapore: Springer Theses, Springer.
207	16	De Gruyter et al., 2014a,	De Gruyter et al., 2014a,	De Gruyter, C., Rose, G., & Currie, G. (2014a). Methodology for evaluating quality of travel plans for new developments. Transportation Research Record: Journal of the Transportation Research Board, 2417, 46–57.
208	16	De Gruyter et al., 2014b;	De Gruyter et al., 2014b;	De Gruyter, C., Rose, G., & Currie, G. (2014b). Securing travel plans through the planning approvals process: A case study of practice from Victoria, Australia. Cities, 41(Part A), 114–122.
209	16	Enoch & Potter, 2003;	Enoch & Potter, 2003;	Enoch, M., & Potter, S. (2003). Encouraging the commercial sector to help employees to change their travel behaviour. Transport Policy, 10(1), 51–58.
210	16	Ho et al., 2017;	Ho et al., 2017;	Ho, C., Mulley, C., Tsai, C.-H., Ison, S., & Wiblin, S. (2017). Area-wide travel plans – targeting strategies for greater participation in Green travel initiatives: A case study of Rouse Hill Town Centre, NSW Australia. Transportation, 44(2), 325–352.
211	16	Jollon, 2013;	Jollon, 2013;	Jollon, M. (2013). Best practices in integrating travel plans with the development approval process: Examples from the USA. Paper presented to Planning Institute of Australia (PIA) 2013 National Congress, Canberra, Australia.
212	16	MAX, 2007;	MAX, 2007;	MAX. (2007). WP d working stage: Analysis – cross national comparison of integration of sustainable transport, mobility management and land use planning in 10 European countries. Brussels: Sixth Framework Programme, European Commission.
213	16	NSW Government, 2011;	NSW Government, 2011;
214	16	Potter & Enoch, 2007;	Potter & Enoch, 2007;	Potter, S., & Enoch, M. (2007). Mobility management in organisations. In J. P. Warren (Ed.), Managing transport energy: Power for a sustainable future (pp. 93–120). Oxford: Oxford University Press.
215	16	RAC, 2014;	RAC, 2014;	RAC. (2014). Travel planning for new developments: Advice for local governments. Perth: RAC Mobility Bulletin #01.
216	16	Rye et al., 2011a;	Rye et al., 2011a;	Rye, T., Green, C., Young, E., & Ison, S. (2011a). Using the land-use planning process to secure travel plans: An assessment of progress in England to date. Journal of Transport Geography, 19(2), 235–243.
217	16	Rye et al., 2011b;	Rye et al., 2011b;	Rye, T., Welsch, J., Plevnik, A., & de Tomassi, R. (2011b). First steps towards cross-national transfer in integrating mobility management and land use planning in the EU and Switzerland. Transport Policy, 18(3), 533–543.
218	16	Pasadena Towers Case Study	Stewart, 1994;	Stewart, J. (1994). Reducing drive-alone rates at small employer sites: Costs and benefits of local trip reduction ordinances – Pasadena towers case study. Transportation Research Record: Journal of the Transportation Research Board, 1433, 159–163.
219	16	UrbanTrans & Kimley Horn Associates, 2014;	UrbanTrans & Kimley Horn Associates, 2014;	UrbanTrans & Kimley Horn Associates. (2014). City of Boulder developer TDM requirements: Best practices research. Boulder, CO: Author.
220	16	Vanoutrive, 2014;	Vanoutrive, 2014;	Vanoutrive, T. (2014). Workplace travel plans: Can they be evaluated effectively by experts? Transportation Planning and Technology, 37(8), 757–774
221	16	Vanoutrive et al., 2010;	Vanoutrive et al., 2010;	Vanoutrive, T., Van Malderen, L., Jourquin, B., Thomas, I., Verhetsel, A., & Witlox, F. (2010). Mobility management measures by employers: Overview and exploratory analysis for Belgium. European Journal of Transport Infrastructure and Research, 10(2), 121–141.
222	16	Wiblin et al., 2012	Wiblin et al., 2012	Wiblin, S., Mulley, C., & Ison, S. (2012). Precinct wide travel plans – learnings from Rouse Hill Town Centre. Paper presented to 35th Australasian Transport Research Forum (ATRF), Perth, Australia.
223	18	Brighton Year 1		Chatterjee, K. (2009). A comparative evaluation of large-scale personal travel planning projects in England. Transport Policy, 16(6), 293-305.	car use	detailed evaluation report not available. Headline results only
224	18	Bristol: Bishopsworth 1		Chatterjee, K. (2009). A comparative evaluation of large-scale personal travel planning projects in England. Transport Policy, 16(6), 293-305.	car use
225	18	Bristol: Bishopsworth 2		Chatterjee, K. (2009). A comparative evaluation of large-scale personal travel planning projects in England. Transport Policy, 16(6), 293-305.	car use
226	18	Bristol: Hartcliffe		Chatterjee, K. (2009). A comparative evaluation of large-scale personal travel planning projects in England. Transport Policy, 16(6), 293-305.	car use
227	18	Bristol: Bishopston		Chatterjee, K. (2009). A comparative evaluation of large-scale personal travel planning projects in England. Transport Policy, 16(6), 293-305.	car use
228	18	Darlington Phase 1		Chatterjee, K. (2009). A comparative evaluation of large-scale personal travel planning projects in England. Transport Policy, 16(6), 293-305.	car use
229	18	Lancashire: South Ribble		Chatterjee, K. (2009). A comparative evaluation of large-scale personal travel planning projects in England. Transport Policy, 16(6), 293-305.	car use
230	18	Nottingham Lady Bay		Chatterjee, K. (2009). A comparative evaluation of large-scale personal travel planning projects in England. Transport Policy, 16(6), 293-305.	car use
231	18	Nottingham Meadows		Chatterjee, K. (2009). A comparative evaluation of large-scale personal travel planning projects in England. Transport Policy, 16(6), 293-305.	car use
232	18	Peterborough Phase 1		Chatterjee, K. (2009). A comparative evaluation of large-scale personal travel planning projects in England. Transport Policy, 16(6), 293-305.	car use
233	18	Worchester Phase 1		Chatterjee, K. (2009). A comparative evaluation of large-scale personal travel planning projects in England. Transport Policy, 16(6), 293-305.	car use
234	18	Experimental Study Munich		Bamberg, S., & Rees, J. (2017). The impact of voluntary travel behavior change measures–A meta-analytical comparison of quasi-experimental and experimental evidence. Transportation Research Part A: Policy and Practice, 100, 16-26.	car use
235	21	Sapporo			car use
236	21	Sapporo (Ainosato)			car use
237	21	Sapporo (Ebetsu)			car use
238	21	Takasaki City			car use
239	21	Kanazawa			car use
240	21	Hitachi City			car use
241	21	Osaka City			car use
242	21	Suita City			car use
243	21	Kawanishi- Inagawa area			car use
244	21	Sapporo			car use
245	21	Mihara Town			car use
246	21	Suzuran-dai (Hyogo- Prefecture)			car use
247	21	Miki City			car use
248	21	Himeji City			car use
249	21	Keihanshin area			car use
250	21	Obihiro City			car use
251	21	Ryugasaki City			car use
252	21	Kanazawa City (several workplaces)			car use
253	21	Toyonaka City (1 workplace)			car use
254	21	Suita City (1 university)			car use
255	21	Himeji City (3 workplaces)			car use
256	21	Osaka Prefecture (several workplaces)			car use
257	21	Sapporo			car use
258	21	Kanazawa			car use
259	21	Sapporo			car use
260	21	Sapporo			car use
261	21	Kanazawa			car use
262	21	Izumi City			car use
263	21	Toyonaka			car use
264	21	Fuji			car use
265	21	Hadano			car use
266	19	Armadale		James, Bruce, Matthew Burke, and Barbara TH Yen. "A critical appraisal of individualised marketing and travel blending interventions in Queensland and Western Australia from 1986–2011." Travel Behaviour and Society 8 (2017): 1-13.
267	19	Bassendean
268	19	Belmont
269	19	Cambridge	(James 2003a,c).	James B (2003a) Involving local communities in mobility management – the TravelSmart lessons in Perth, Australia unpublished paper James B (2003c) Update on the TravelSmart programme in Perth Western Australia. unpublished paper
270	19	Canning
271	19	Gosnells (Thornlie)
272	19	Claremont
273	19	Cottesloe
274	19	Nedlands
275	19	Fremantle
276	19	Joondalup
277	19	Joondalup (Living Smart)
278	19	Mandurah (Living Smart)
279	19	Melville (East)
280	19	Melville (West)
281	19	Perth City
282	19	Stirling
283	19	Vincent
284	19	Rockingham
285	19	South Perth
286	19	Subiaco
287	19	Swan
288	19	Victoria Park
289	19	Wanneroo (Clarkson)
290	19	Wanneroo (Marangaroo)
291	19	Adelaide pilot	Adelaide pilot
292	19	Adelaide – Christies Beach	Adelaide – Christies Beach
293	19	Adelaide – Dulwich	Adelaide – Dulwich
294	19	Brisbane – Holland Park (Qld)	Brisbane – Holland Park (Qld)
295	19	Redland	Redland	Socialdata Australia (2005c) Individualised Marketing for the Shire of Redland – Final Report Queensland Transport, Australia.
296	19	Brisbane (North)	Brisbane (North)	Goulias, K.G. 2008. Audit of Brisbane North Communities Project: Final Report Brisbane City Council, Australia.
297	19	Brisbane (South)	Brisbane (South)	Goulias, K.G., 2001. Audit of South Perth Individualized Marketing Evaluation Survey – Final Report Department of Transport. Western Australia http://www.transport.wa.gov.au/activetransport/24690.asp.
298	19	Gold Coast	Gold Coast	Goulias, K.G., Brög, W., James, B., Graham, C., 2002. Travel behavior analysis of south Perth individualized marketing intervention. Transp. Res. Rec. 1807, 77–86.
299	19	Sunshine Coast	Sunshine Coast
300	19	South Perth (WA)	South Perth (WA)
301	19	Grange (Qld)	Grange (Qld)
302	19	Townsville (Qld)	Townsville (Qld)
303	36	occupational health care units (OHC) intervention	Aittasalo 2012 Intervention	Aittasalo M, Rinne M, Pasaren M, Kukkonen-Harjula G, Vasankari T: Promoting walking among office employees―evaluation of a randomized controlled intervention with pedometers and e-mail messages. BMC Public 2012, 12:403.	walking
304	36	implementation intentions intervention	Armitage 2011	Armitage CJ, Reid JC, Spencer CP: Evidence that implementation intentions reduce single-occupancy car use in a rural population: moderating effects of compliance with instructions. Transportmetrica 2011, 7:455–466.	car use
305	36	Residential relocation intervention	Bamberg 2006	Bamberg S: Is a residential relocation a good opportunity to change people’s travel behavior? Results From a theory-driven intervention study. Environ Behav 2006, 38:820–840	travel mode choice
306	36	self-regulated behavioral change intervention: Stage-based dialog campaign	Bamberg 2013	Bamberg S: Applying the stage model of self-regulated behavioral change in a car use reduction intervention. J Environ Psychol 2013, 33:68–75.	car use
306	36	self-regulated behavioral change intervention: standardized information	Bamberg 2013	Bamberg S: Applying the stage model of self-regulated behavioral change in a car use reduction intervention. J Environ Psychol 2013, 33:68–75.	car use
308	36	rush-hour avoidance intervention: Yeti	Ben-Elia 2011	Ben-Elia E, Ettema D: Changing commuters’ behavior using rewards: a study of rush-hour avoidance. Transp Res Part F Traffic Psychol Behav 2011, 14:354–368.	rush-hour avoidance
308	36	rush-hour avoidance intervention: Monetary	Ben-Elia 2011	Ben-Elia E, Ettema D: Changing commuters’ behavior using rewards: a study of rush-hour avoidance. Transp Res Part F Traffic Psychol Behav 2011, 14:354–368.	rush-hour avoidance
310	36	Sweden car use reduction intervention	Eriksson 2008	Eriksson L, Garvill J, Nordlund A: Interrupting habitual car use: the importance of car habit strength and moral motivation for personal car use reduction. Transp Res Part F Traffic Psychol Behav 2008, 11(6):427–433.	car use
311	36	Sapporo city school intervention: planning group	Fujii 2005	Fujii S, Taniguchi A: Reducing family car-use by providing travel advice or requesting behavioral plans: an experimental analysis of travel feedback programs. Transport Res D-Tr E 2005, 10:385–393.	car use
311	36	Sapporo city school intervention: Advice	Fujii 2005	Fujii S, Taniguchi A: Reducing family car-use by providing travel advice or requesting behavioral plans: an experimental analysis of travel feedback programs. Transport Res D-Tr E 2005, 10:385–393.	car use
313	36	Umea awareness experiment	Garvill 2003	Garvill J, Marell A, Nordlund A: Effects of increased awareness on choice of travel mode. Transportation 2003, 30(1):63–79.	travel mode choice
314	36	Göteborg car reduction experiment: charge	Jakobsson 2002	Jakobsson C, Fujii S, Gärling T: Effects of economic disincentives on private car use. Transportation 2002, 29(4):349–370.	car use
314	36	Göteborg car reduction experiment: Charge + plan	Jakobsson 2002	Jakobsson C, Fujii S, Gärling T: Effects of economic disincentives on private car use. Transportation 2002, 29(4):349–370.	car use
314	36	Göteborg car reduction experiment: Extend charge + plan	Jakobsson 2002	Jakobsson C, Fujii S, Gärling T: Effects of economic disincentives on private car use. Transportation 2002, 29(4):349–370.	car use
317	36	Bochum and Dortmund experiment: Commitment + free ticket	Matthies 2006	Matthies E, Klöckner C, Preißner C: Applying a modified moral decision making model to change habitual car use: how can commitment be effective? Appl Psychol 2006, 55:91–106.	car use
317	36	Bochum and Dortmund experiment: Free ticket	Matthies 2006	Matthies E, Klöckner C, Preißner C: Applying a modified moral decision making model to change habitual car use: how can commitment be effective? Appl Psychol 2006, 55:91–106.	car use
317	36	Bochum and Dortmund experiment: Commitment	Matthies 2006	Matthies E, Klöckner C, Preißner C: Applying a modified moral decision making model to change habitual car use: how can commitment be effective? Appl Psychol 2006, 55:91–106.	car use
320	36	152, 162	Mutrie 2002	Mutrie, N., Carney, C., Blamey, A., Crawford, F., Aitchison, T., & Whitelaw, A. (2002). “Walk in to Work Out”: a randomised controlled trial of a self help intervention to promote active commuting. Journal of Epidemiology & Community Health, 56(6), 407-412.	walking and cycling
321	36	Gouda experiment: Environmental information	Tertoolen 1998	Tertoolen G, Van Kreveld D, Verstraten B: Psychological resistance against attempts to reduce private car use. Transp Res Part A Policy Pract 1998, 32:171–181.	car use
321	36	Gouda experiment: Cost information	Tertoolen 1998	Tertoolen G, Van Kreveld D, Verstraten B: Psychological resistance against attempts to reduce private car use. Transp Res Part A Policy Pract 1998, 32:171–181.	car use
321	36	Gouda experiment: Environment + Cost information	Tertoolen 1998	Tertoolen G, Van Kreveld D, Verstraten B: Psychological resistance against attempts to reduce private car use. Transp Res Part A Policy Pract 1998, 32:171–181.	car use
321	36	Gouda experiment: Self-monitoring, No information	Tertoolen 1998	Tertoolen G, Van Kreveld D, Verstraten B: Psychological resistance against attempts to reduce private car use. Transp Res Part A Policy Pract 1998, 32:171–181.	car use
325	36	Copenhagen experiment: Free travelcard	Thøgersen 2008	Thøgersen J: Promoting public transport as a subscription service: effects of a free month travel card. Transp Policy 2009, 16:335–343.	PT
325	36	Copenhagen experiment: Customised Timetable	Thøgersen 2008	Thøgersen J: Promoting public transport as a subscription service: effects of a free month travel card. Transp Policy 2009, 16:335–343.	PT
325	36	Copenhagen experiment: Free travelcard + customised timetable	Thøgersen 2008	Thøgersen J: Promoting public transport as a subscription service: effects of a free month travel card. Transp Policy 2009, 16:335–343.	PT
325	36	Copenhagen experiment: Plan	Thøgersen 2008	Thøgersen J: Promoting public transport as a subscription service: effects of a free month travel card. Transp Policy 2009, 16:335–343.	PT
325	36	Copenhagen experiment: Free travelcard + plan	Thøgersen 2008	Thøgersen J: Promoting public transport as a subscription service: effects of a free month travel card. Transp Policy 2009, 16:335–343.	PT
330	24		Australian Greenhouse Office, 2005		bike
331	24	Brog and Barta, 2007;	Brog and Barta, 2007;	Brog, W., Barta, F., 2007. National demonstration project (FTA): Individualized marketing demonstration program. 86th Annual Meeting of the Transportation Research Board. Transportation Research Board, Washington, DC.	bike
332	24	Cooper, 2007;	Cooper, 2007;	Cooper, C., 2007. Successfully changing individual travel behavior: Applying community-based social marketing to travel choice. 86th Annual Meeting of the Transportation Research Board. Transportation Research Board, Washington, DC.	bike
333	24	Portland Office of Transportation, 2007;	Portland Office of Transportation, 2007;		bike
334	24	Socialdata America, 2005;	Socialdata America, 2005;		bike
335	24	City of Portland Office of Transportation, 2006;	City of Portland Office of Transportation, 2006;		bike
336	24	City of Portland Office of Transportation, 2005).	City of Portland Office of Transportation, 2005).		bike
337	31	South Perth TravelSmart, 1997			PT
338	31	Met Bus Information and marketing Campaign			PT
339	31	Melbourne Tram and Info Marketing Campaign , 1997			PT
340	16	Office (6 sites)	Spack et al., (2010)	Spack, M., Bultman, M., Pettis, K., Thompson, J., & Collins, J. (2010). Travel demand management: An analysis of the effectiveness of TDM plans in reducing traffic and parking in the Minneapolis-St. Paul metropolitan area. Minnesota: Spack Consulting.
341	16	Office (1 site)	(NSW Government, 2011)	NSW Government. (2011). Active travel: Optus relocation. Sydney, New South Wales: Author.
342	16	Office (1 site)	(Baker, 2007)	Baker G., Gray S. R., Wright A., Fitzsimons C., Nimmo M., Lowry R., & Mutrie N. (2008). The effect of a pedometer-based community walking intervention “Walking for Wellbeing in the West” on physical activity levels and health outcomes: A 12 week randomized controlled trial. International Journal of Behavior Nutrition and Physical Activity, 5, 44. doi:10.1186/1479-5868-5-44
343	16	Employment (20 sites)a	(Cairns et al., 2010)	Cairns, S., Newson, C., & Davis, A. (2010). Understanding successful workplace travel initiatives in the UK. Transportation Research Part A: Policy and Practice, 44(7), 473–494.
344	16	Residential (16 sites)	(Arlington County Commuter Services, 2013)	Arlington County Commuter Services. (2013). Residential building transportation performance monitoring study. Arlington, VA: Author.
345	16	Residential (8 sites)	(WSP, 2014)	WSP. (2014). Does car ownership increase car use? A study of the use of car parking within residential developments in London. Surrey: Commissioned by the Berkeley Group.
345		Beddington Zero Energy Development (BedZED), South London, UK		BedZED Seven Years On: The Impact of the UK’s Best Known Eco-Village and Its Residents. BioRegional, London, 2009.
344		Poole Quarter, Poole, UK		Making Residential Travel Plans Work: Guidelines for New Development. UK Department for Transport, London, 2005. Melia, S. Potential for Carfree Development in the UK. Faculty of Environment and Technology, University of West England, Bristol, United Kingdom, 2009.
344		Newcastle Great Park, Newcastle upon Tyne, UK		Travel Plan Services Ltd. Newcastle Great Park Framework Travel Plan Implementation: Annual Progress and Monitoring Report. Wakefield, United Kingdom, 2013.
344		Queen Elizabeth Park, Guildford		Making Residential Travel Plans Work: Guidelines for New Development. UK Department for Transport, London, 2005.
344		30 residential and mixeduse developments in Melbourne, Australia		De Gruyter, C., G. Rose, and G. Currie. Methodology for Evaluating Quality of Travel Plans for New Developments. In Transportation Research Record: Journal of the Transportation Research Board, No. 2417, Transportation Research Board of the National Academies, Washington, D.C., 2014, pp. 46–57.
344		Rouse Hill, New South Wales, Australia		Wiblin, S., C. Mulley, and S. Ison. Precinct-Wide Travel Plans: Learnings from Rouse Hill Town Centre. Presented at 35th Australasian Transport Research Forum, Perth, Australia, 2012.
346	16	Residential (4 sites) :Case–Control 1 (CC1)	De Gruyter et al., 2015c	De Gruyter, C., Rose, G., & Currie, G. (2015c). Understanding travel plan effectiveness for new residential developments. Transportation Research Record: Journal of the Transportation Research Board, 2537, 126–136.
346	16	Residential (4 sites) : Case–Control 2 (CC2)	De Gruyter et al., 2015c	De Gruyter, C., Rose, G., & Currie, G. (2015c). Understanding travel plan effectiveness for new residential developments. Transportation Research Record: Journal of the Transportation Research Board, 2537, 126–136.
346	16	Residential (4 sites) : Case–Control 3 (CC3)	De Gruyter et al., 2015c	De Gruyter, C., Rose, G., & Currie, G. (2015c). Understanding travel plan effectiveness for new residential developments. Transportation Research Record: Journal of the Transportation Research Board, 2537, 126–136.
346	16	Residential (4 sites) : Case–Control 4 (CC4)	De Gruyter et al., 2015c	De Gruyter, C., Rose, G., & Currie, G. (2015c). Understanding travel plan effectiveness for new residential developments. Transportation Research Record: Journal of the Transportation Research Board, 2537, 126–136.
350	16	Residential (1 site)	(Wiblin et al., 2012)	Wiblin, S., Mulley, C., & Ison, S. (2012). Precinct wide travel plans – learnings from Rouse Hill Town Centre. Paper presented to 35th Australasian Transport Research Forum (ATRF), Perth, Australia.
351	16	hospital travel plan (1 site)	(Petrunoff et al., 2016b)	Petrunoff, N., Wen, L. M., & Rissel, C. (2016b). Effects of a workplace travel plan intervention encouraging active travel to work: Outcomes from a three-year time-series study. Public Health, 135, 38–47.
352	16	Hospital (2 sites)	(Petrunoff et al., 2015)	Petrunoff, N., Rissel, C., Wen, L. M., & Martin, J. (2015). Carrots and sticks vs carrots: Comparing approaches to workplace travel plans using disincentives for driving and incentives for active travel. Journal of Transport & Health, 2(4), 563–567.
352	16	Hospital (2 sites)	(Petrunoff et al., 2015)	Petrunoff, N., Rissel, C., Wen, L. M., & Martin, J. (2015). Carrots and sticks vs carrots: Comparing approaches to workplace travel plans using disincentives for driving and incentives for active travel. Journal of Transport & Health, 2(4), 563–567.
353	24	Sheffield University	Rye, 2002
354	24	Nottingham City Hospital, Nottingham, East Midlands	Rye, 2002
355	24	Fife Council, Fife, Scotland	Rye, 2002
356	24	Hewlett Packard, Edinburgh, Scotland	Rye, 2002
357	24	Stockley Park Business Park, near Heathrow Airport, West London	Rye, 2002
358	24	Gyle/New Edinburgh Park (NEP), Edinburgh	Rye, 2002
359	5	Walk to Work day	Merom et al., 2005	Merom, Dafna, et al. "Effect of Australia's Walk to Work Day campaign on adults' active commuting and physical activity behavior." American Journal of Health Promotion 19.3 (2005): 159-162.	travel mode choice
360	5	University of Bristol Staff Travel Surveys	Brockman and Fox, 2011	Brockman, R., Fox, K.R., 2011. Physical activity by stealth? The potential health benefits of a workplace transport plan. Public Health 125, 210–216.	travel mode choice
361	5	pilot study in Australia	Wen et al., 2005	Li Ming Wen, Neil Orr, Jeni Bindon, Chris Rissel, Promoting active transport in a workplace setting: evaluation of a pilot study in Australia, Health Promotion International, Volume 20, Issue 2, June 2005, Pages 123–133, https://doi.org/10.1093/heapro/dah602
362	5	cycle commuting in New Zealand	O’Fallon, 2010*	O’Fallon, C., 2010. Bike now: exploring methods of building sustained participation in cycle commuting in New Zealand. Road Transp. Res. 19, 77–89.
363	5	town-wide cycling initiatives in England	Goodman et al., 2013	Goodman, A., Panter, J., Sharp, S.J., Ogilvie, D., 2013. Effectiveness and equity impacts of town-wide cycling initiatives in England: a longitudinal, controlled natural experimental study. Soc. Sci. Med. 97, 228–237.
364	5	education classes	Thomas et al., 2009	Thomas, I.M., Sayers, S.P., Godon, J.L., Reilly, S.R., 2009. Bike, walk, and wheel: a way of life in Columbia, Missouri. Am. J. Prev. Med. 37, S322–S328.
365	5	Clean Air Force’s ‘‘Don’t Drive 1-in-5’’ campaign	Alcott and DeCindis, 1991	Alcott, R., DeCindis, M.M., 1991. Clean air force campaign 1989–1990: programs, attitudes, and commute behavior changes. Transp. Res. Rec. 1321, 34–44.
366	5	TravelSmart	James and Brög, 2001	James, B., Brög, W., 2001. Increasing walking trips through TravelSmart individualised marketing. World Transp. Policy Pract. 7, 61–66.
367	24	Touwen, 1997	Touwen, 1997	Touwen, M., 1997. Stimulating bicycle use by companies in the Netherlands. In: Tolley, ,R. (Ed.), The greening of urban transport: Planning for walking and cycling in western cities. John Wiley & Sons Ltd., Chichester, U.K., pp. 415–422.	bike
368	24	‘You-move-nrw’ campaign	Reutter, 2004	Reutter, O., 2004. The ‘You-move-nrw’ campaign—New partnerships for youth oriented and environmentally friendly mobility management. World Transp. Policy Pract. 10 (4), 15–21.	bike
369	24	Marin County Safe Routes	Staunton et al., 2003	Staunton, C.E., Hubsmith, D., Kallins, W., 2003. Promoting safe walking and biking to school: The Marin County success story. Am. J. Public Health 93, 1431–1434.	bike
370	24	California's safe routes to school	Boarnet et al., 2005	Boarnet, M.G., Day, K., Anderson, C., McMillan, T., Alfonzo, M., 2005. California's safe routes to school program. Impacts on walking, bicycling, and pedestrian safety. J. Am. Plann. Assoc. 71, 301–317.	bike
371	24	California's safe routes analysis	Orenstein et al., 2007	Orenstein, M.R., Gutierrez, N., Rice, T.M., Cooper, J.F., Ragland, D.R., 2007. Safe Routes to School safety and mobility analysis. Traffic Safety Center, Univ. of California at Berkeley.	bike
372	24	‘Ride to Work Day’	Rose and Marfurt, 2007	Rose, G., Marfurt, H., 2007. Travel behaviour change impacts of a major ride to work day event. Transp. Res. Part A 41, 351–364.	bike
373	24	Ciclovía-Recreativa	Sarmiento et al., 2010	Sarmiento, O., Torres, A., Jacoby, E., Pratt, M., Schmid, T., Stierling, G., 2010, in press. The Ciclovía-Recreativa: A mass recreational program with looming public health potential. J. Phys. Act. Health.	bike	check the underlying case studies
374	24	Ciclovias	Gomez et al. (2005)	Gomez, L., Sarmiento, O., Lucimi, D., Espinosa, G., Forero, R., Bauman, A., 2005. Prevalence and factors associated with walking and bicycling for transport among young adults in two low-income localities of Bogotá, Colombia. J. Phys. Act. Health 2, 445–449.	bike
375	24	Ciclovias	Parra et al., 2007;	Parra, D., Gomez, L., Pratt, M., Sarmiento, O., Mosquera, J., Triche, E., 2007. Policy and built environment changes in Bogota and their importance in health promotion. Indoor Built Environ. 16 (4), 344–348.	bike
376	24	Ciclovias	IDU, 2009;	IDU, 2009. CicloRutas. Instituto de Desarrollo Urbano (IDU), City of Bogota, Colombia. Available at: http://www.idu.gov.co/web/guest/espacio_ciclorutas.	bike
377	24	Ciclovias	IDRD, 2004;	IDRD, 2004. Ciclovía Recreovía. Instituto Distrital para la Recreación y el Deporte (IDRD), City of Bogota, Colombia. Available at: http://www.idrd.gov.co/www/section-27.jsp.	bike
378	24	Ciclovias	Despascio, 2008	Despascio, A., 2008. Bogotá: Edging back from the brink. Sustainable Transport 20, 14–18.	bike
379	24	Ciclovias	Montezuma, 2005;		bike
380	24	mass cycling event	Bowles et al., 2006	Bowles, H.R., Rissel, C., Bauman, A.E., 2006. Mass cycling events: Who participates and is their post-event behaviour influenced by participation? Int. J. Behav. Nutr. Phys. Act 3, 39. doi:10.1186/1479-5868-3-39.	bike
381	24	Great Victorian Bike Ride	Godbold, 2005	Godbold, T., 2005. Exploring the self reported impacts of participation in the 2004 Great Victorian Bike Ride. School of Health and Social Development, Deakin University, Melbourne, Australia.	bike
382	24	Cycling promotion	Greig, 2001	Greig, R., 2001. Cycling promotion in Western Australia. Health Promot. J. Austr. 12, 250–253.	bike
383	24	soccer games in Davis	Tal and Handy, 2008	Tal, G., Handy, S., 2008. Children's biking for non-school purposes: Getting to soccer games in Davis, CA. Transp. Res. Rec. 2074, 40–45.	bike
384	24	central Sidney	Telfer et al., 2006	Telfer, B., Rissel, C., Bindon, J., Bosch, T., 2006. Encouraging cycling through a pilot cycling proficiency training program among adults in central Sidney. J. Sci. Med. Sport 9, 151–156.	bike
385	24	Bauman et al., 2008	Bauman et al., 2008	Bauman, A., Rissel, C., Garrard, J., Kerr, I., Speidel, R., Fishman, E., 2008. Getting Australia moving: Barrriers, facilitators and interventions to get more Australians physically active through cycling. Funded by the Australian Government, Department of Health and Ageing. Cycling Promotion Fund, Melbourne.	bike
388	3	Minnesota	Buxbaum, (2006)	Buxbaum, J., 2006. Mileage-Based User Fee Demonstration Project: Pay-as-You-Drive Experimental Findings. Minnesota Department of Transportation, Research Report 2006. 39A.	car use
389	3	North Central Texas pay-as-you-drive insurance program	Reese and Pash-Brimmer, 2009;	Reese, C.A., Pash-Brimmer, A., 2009. North Central Texas pay-as-you-drive insurance pilot program. In: Pulugurtha, S. (Ed.), Transportation, Land Use, Planning and Air Quality: Selected Papers of the 2009 Transportation, Land Use, Planning and Air Quality Conference. American Society of Civil Engineers,Washington D. C., pp. 41–50.	car use
390	3	pay-as-you drive vehicle insurance: Dutch field experiment	Bolderdijk et al., 2011;	Bolderdijk, J.W., Knockaert, J., Steg, E.M., Verhoef, E.T., 2011. Effects of pay-as-you drive vehicle insurance on young drivers’ speed choice: results of a Dutch field experiment. Accid. Anal. Prev. 43, 1181–1186.	car use
391	3	Greaves and Fifer, 2013),	Greaves and Fifer, 2013),		car use
392	3	Belonitor trial	Mazureck and van Hattem, 2006;	Mazureck, U., van Hattem, J., 2006. Rewards for safe driving behavior influence on following distance and speed. Transp. Res. Rec. 1980, 31–38.	car use
393	3	vehicle-fleet experiment	Hultkrantz and Lindberg, 2011;	Hultkrantz, L., Lindberg, G., 2011. Pay-as-you-speed. An economic field experiment. J. Transp. Econ. Policy 45, 415–436.	car use
394	3	Pay as you speed, ISA	Lahrmann et al., 2012;	Lahrmann, H., Agerholm, N., Tradisauskas, N., Berthelsen, K.K., Harms, L., 2012. Pay as you speed, ISA with incentives for not speeding: results and interpretation of speed data. Accid. Anal. Prev. 48, 17–28.	car use
395	3	pay-as-you-speed trial	Stigson et al., 2014	Stigson, H., Hagberg, J., Kullgren, A., & Krafft, M. (2014). A one year pay-as-you-speed trial with economic incentives for not speeding. Traffic injury prevention, 15(6), 612-618.	car use
396	33	sunday saver and seniors sunday pass	Webb et al. (2007)	Webb, A., Martin, S., Le-Nguyen, P., 2007. The sunday saver and seniors sunday pass—growing public transport patronage at reasonable cost. In: 30th Australasian Transport Research Forum. Melbourne, Australia: Australasian Transport	PT
397	33	Perone and Volinski (2003)	Perone and Volinski (2003)	Perone, J. S., & Volinski, J. M. (2003). Fare, free, or something in between? University of South Florida, Tampa FL, USA (2003)	PT
398	33	Brussels “free” public transport	De Witte et al. (2006)	De Witte, A., Macharis, C., Lannoy, P., Polain, C., Steenberghen, T., & Van de Walle, S. (2006). The impact of “free” public transport: The case of Brussels. Transportation Research Part A: Policy and Practice, 40(8), 671-689.	PT
399	33	free bus ticket experiment	Fujii and Kitamura (2003)	Fujii, S., & Kitamura, R. (2003). What does a one-month free bus ticket do to habitual drivers? An experimental analysis of habit and attitude change. Transportation, 30(1), 81-95.	PT
400	33	Copenhagen public transport as subscription	Thøgersen (2009)	Thøgersen, J. (2009). Promoting public transport as a subscription service: Effects of a free month travel card. Transport Policy, 16(6), 335-343.	PT
401	33	Breaking car use habits: free one-month travelcard.	Thøgersen and Møller (2008)	Thøgersen, J., & Møller, B. (2008). Breaking car use habits: The effectiveness of a free one-month travelcard. Transportation, 35(3), 329-345.	PT
402	33	Trento, Italy.	Fiorio & Percoco (2007)	Fiorio, C. V., & Percoco, M. (2007). Would you stick to using your car even if charged? Evidence from Trento, Italy. Transport reviews, 27(5), 605-620.	PT
403	37, 12	cashing out employer-paid parking	Shoup (1997)	Shoup, D.C., 1997. Evaluating the effects of cashing out employer-paid parking: eight case studies. Transp. Policy 4, 201–216.	car use
404	24	West Edinburgh, Scotland	Ryley, 2006).	Ryley, T.J., 2006. Estimating cycling demand for the journey to work or study in West Edinburgh, Scotland. Transp. Res. Rec. 1982, 187–193.	bike
405	24	Martens (2007)	Martens (2007)	Martens, K., 2007. Promoting Bike and Ride: The Dutch experience. Transp. Res. Part A 41, 326–338.	bike
406	24	Bicycle parking, storage, and changing facilities	Litman (2009)	Litman, T., 2009. Bicycle parking, storage, and changing facilities. Accessible at: http://www.vtpi.org/tdm/tdm85.htm.	bike
407	24	Ecoplan, 2009;	Ecoplan, 2009;	Ecoplan, 2009. World City Bike Cooperative: Public bike system inventory. Accessible at: http://www.ecoplan.org/wtpp/citybike_index.htm.	bike
408	24	DeMaio, 2009a;	DeMaio, 2009a;	DeMaio, P., 2009a. The bike-sharing blog. Accessible at: http://bike-sharing.blogspot.com.	bike
409	24	Holtzman, 2008;	Holtzman, 2008;	Holtzman, D., 2008. Share a bike. Planning 74 (5), 20–23.	bike
410	24	Public bicycles	Buehrmann, 2008.	Buehrmann, S., 2008. Public bicycles. Niches policy notes. Accessible at: http://ange.archangelis.com/typo3/niches/fileadmin/New_folder/Deliverables/D4.3b_5.8_B._PolicyNotes/14397_pn4_public_bikes_ok_low.pdf.	bike
412	24	Spicycles in Barcelona	Romero, 2008	Romero, C., 2008. Spicycles in Barcelona. PowerPoint Presentation by City of Barcelona at the Spicycles Conference, Bucharest, Romania, December 2008. Accessible at: http://spicycles.velo.info/Portals/0/FinalReports/Barcelona_Final_Report.ppt.	bike
413	24	Bike sharing in Paris	Nadal, 2007;	Nadal, L., 2007. Bike sharing sweeps Paris off its feet. Sustainable Transport 19, 8–12.	bike
414	24	City of Paris	City of Paris, 2007	City of Paris, 2007. Le bilan des deplacements en 2007 a Paris. La Mairie de Paris, L'Observatoire de Deplacements, Paris, France.
415	24	public use bicycle program in Philadelphia	Bonnette, 2007	Bonnette, B., 2007. Implementation of a public use bicycle program in Philadelphia. Senior Thesis. Unpublished. Univ. of Pennsylvania, Philadelphia.	bike
416	24	Velo'v	Velo'v, 2009	Velo'v, 2009. Velo'v information website. Accessible at: http://www.velov.grandlyon.com/Archives-Velo-V.63.0.html.
417	24, 5	Smart bicycles in London	Noland and Ishaque, 2006).	Noland, R.B., Ishaque, M.M., 2006. Smart bicycles in an urban area: evaluation of a pilot scheme in London. J. Publ. Transp. 9, 71–95.	bike
418	24	Smart bicycles in Arhus,	Bunde, 1997;	Bunde, J., 1997. The BikeBus'ters from Arhus, Denmark: ‘We'll park our cars for 200 years…’. In: Tolley, R. (Ed.), The greening of urban transport. Wiley, Chichester, UK, pp. 373–378.	bike
419	24	Smart bicycles in "BikeBus' ters	Overgaard-Madsen et al., in press).	Madsen, Jens Chr Overgaard. "BikeBus' ters: From Car to Bike and Busses in Aarhus." (2002).	bike
421	5	public bicycle share program in Montreal, Canada	Fuller et al., 2013	Fuller, D., Gauvin, L., Kestens, Y., Morency, P., Drouin, L., 2013. The potential modal shift and health benefits of implementing a public bicycle share program in Montreal, Canada. Int. J. Behav. Nutr. Phys. Act 10, 66.	bike
422		Leeds	Jopson 2004	Jopson, A. (2004) Assessing New Transport Policy Instruments. In: 10th World Conference on Transport Research, 4th-8th July 2004., Istanbul, Turkey. (Unpublished)
423		Manchester	Jopson 2004	Jopson, A. (2004) Assessing New Transport Policy Instruments. In: 10th World Conference on Transport Research, 4th-8th July 2004., Istanbul, Turkey. (Unpublished)
3431	343	TCRP (1994)		Transit Co-operative Research Program, 1994. Cost Effectiveness of TDM Programs Working Paper #2. COMSIS Corporation.
3432	343	Organisational Coaching and Schreffler (1996)		Organisational Coaching, Schreffler, 1996. Effectve TDM at Worksites in the Netherlands and the US. Organisational Coaching, Netherlands.
3433	343	Shoup (1997)		Shoup, D., 1997. Evaluating the effects of cashing out employer-paid parking: eight case studies. Transport Policy 4 (4), 201–216.
3434	343	Ligtermoet (1998)		Ligtermoet, D., 1998. Zeven jaar vervoermanagement: synthese van ervaringen Report to Adviesdienst Verkeer en Vervoer. Netherlands Ministry of Transport, The Hague
3435	343	Touwen (1999)		Touwen, M., 1999. Travel Planning in the Randstad: An Evaluation Based on ReMOVE. Report to Netherlands Ministry of Transport, The Hague.
3436	343	Rye (2002)		Rye, T., 2002. Travel plans: do they work? Transport Policy 9 (4), 287–298.
3437	343	Smith and Emmerson (2009)		Smith, I., Emmerson, P., 2009. Travel Plans – the Potential is Realised: Evidence from the Highways Agency’s ITB Programme. Powerpoint Presentation to TRICS.
501	51	Mercy San Juan Hospital
502	51	Rijnstate Hospital
503	51	The Boeing Company
504	51	Océ Nederland B.V.
505	51	National Oceanic and Atmospheric Administration (NOAA)
506	51	Ministry of Transport, Public Works and Water Manage-ment
507	51	City of Pasadena
508	51	Province of Gelderland
509	51	Southern California Gas
510	51	PTT Telecom
511	51	Commonwealth Land Title
512	51	Nationale Nederlanden nv
513	51	University of Washington
514	51	Rijksuniversiteit Limburg (campus Randwijck)
515	51	Logan International Airport
516	51	Airport Schiphol
517	51	Rick Engineering
518	51	Heidemij Consultancy
519	51	Rockbestos Company
520	52	Case Study 1 – West Midlands
521	52	Case Study 2 – South West
522	52	Case Study 4 – East of England
523	52	Case Study 5 – Yorkshire and Humber
524	52	Case Study 7 – Yorkshire and Humber
525	52	Case Study 8 – East Midlands
526	52	Case Study 3 – East of England
527	52	Case Study 6 – South East
528	52	Case Study 9 – Yorkshire and Humber
601	61	Buckley et al., 2013) USA (Moscow, Idaho)		Buckley, A., Lowry, M.B., Brown, H., Barton, B., 2013. Evaluating safe routes to school events that designate days for walking and bicycling. Transp. Policy 30, 294–300
602	61	Buckley et al. 2013 [29] [spring event]		Buckley, A., Lowry, M.B., Brown, H., Barton, B., 2013. Evaluating safe routes to school events that designate days for walking and bicycling. Transp. Policy 30, 294–300
603	61	Buliung et al. 2011 [30] 4 Canadian provinces: Ontario, Alberta, British Columbia, Nova Scotia		Buliung R, Faulkner G, Beesley T, Kennedy J. School travel planning: mobilizing school and community resources to encourage active school transportation. J Sch Health. 2011;81:704–12.
604	61	Bungum et al. 2014 [31] Las Vegas, USA		Bungum TJ, Clark S, Aguilar B. The effect of an active transport to school intervention at a suburban elementary school. Am J Health Educ. 2014;45(4): 205–9
605	61	Christiansen et al. 2014 [32] Denmark		Christiansen LB, Toftager M, Ersbøll AK, Troelsen J. Effects of a Danish multicomponent physical activity intervention on active school transport. J Transp Health. 2014;1:174–81.
606	61	Coombes et al. 2016 United Kingdom		Coombes E, Jones A. Gamification of active travel to school: a pilot evaluation of the beat the street physical activity intervention. Health Place. 2016;39:62–9.
607	61	Crawford & Garrard, 2013 [34] Victoria, Australia [pilot schools]		Crawford S, Garrard J. A combined impact-process evaluation of a program promoting active transport to school: understanding the factors that shaped program effectiveness. J Environ Public Health. 2013;816961
608	61	Crawford & Garrard, 2013 [34] Victoria, Australia [program schools]		Crawford S, Garrard J. A combined impact-process evaluation of a program promoting active transport to school: understanding the factors that shaped program effectiveness. J Environ Public Health. 2013;816961
609	61	Ducheyne et al. 2014 [35] Belgium		Ducheyne F, de Bourdeaudhuij I, Lenoir M, Cardon G. Effects of a cycle training course on children’s cycling skills and levels of cycling to school. Accid Anal Prev. 2014;67:49–60.
610	61	Goodman et al. 2016 [36]		Goodman A, van Sluijs EM, Ogilvie D. Impact of offering cycle training in schools upon cycling behaviour: a natural experimental study. Int J Behav Nutr Phys Act. 2016;13:34
611	61	Gutierrez et al. 2014 [37] Miami, USA		Gutierrez CM, Slagle D, Figueras K, Anon A, Huggins AC, Hotz G. Crossing guard presence: impact on active transportation and injury prevention. J Transp Health. 2014;1:116–23.
612	61	Henderson et al. 2013 Atlanta, USA		Hendersen S, Tanner R, Klanderman S, Mattera A, Webb LM, Steward J. Safe routes to school: a public health practice success story—Atlanta, 2008–2010. J Phys Act Health. 2013;10(2):141–2.
613	61	Hinckson et al. 2011a New Zealand		Hinckson EZ, Badland HM. School travel plans: preliminary evidence for changing school-related travel patterns in elementary school children. Am J Health Promot. 2011;25(6):368–71.
614	61	Hinckson et al. 2011b [18] New Zealand		Hinckson EA, Garrett N, Duncan S. Active commuting to school in New Zealand children (2004-2008): a quantitative analysis. Prev Med. 2011;52(5):332–6.
615	61	Hoelscher et al. 2016 [39] Texas, USA		Hoelscher D, Ory M, Dowdy D, et al. Effects of funding allocation for safe routes to school programs on active commuting to school and related behavioral, knowledge, and psychosocial outcomes: results from the Texas childhood obesity prevention policy evaluation (T-COPPE) study. Environ Behav. 2016;48(1):210–29.
616	61	Hunter et al. 2015 [40] London, England Reading, England Vancouver, Canada		Hunter RF, de Silva D, Reynolds V, Bird W, Fox KR. International inter-school competition to encourage children to walk to school: a mixed methods feasibility study. Int J Behav Nutr Phys Act. 2015;8:19.
617	61	Johnson et al. 2016 [41]		Johnson R, Frearson M, Hewson P. Can bicycle training for children increase active travel? Eng Sustain. 2016;169(2):49–57.
618	61	Johnson et al. 2016 [41] England [CensusAtSchool]		Johnson R, Frearson M, Hewson P. Can bicycle training for children increase active travel? Eng Sustain. 2016;169(2):49–57.
619	61	Mammen et al. 2014a [19] Canada		Mammen G, Stone MR, Faulkner G, et al. Active school travel: an evaluation of the Canadian school travel planning intervention. Prev Med. 2014;60:55–9.
620	61	Mammen et al. 2014b [64]		Mammen G, Stone MR, Buliung N, Faulkner G. School travel planning in Canada: identifying child, family, and school-level characteristics associated with travel mode shift from driving to active school travel. J Transp Health. 2014;1(4):288–94
621	61	McDonald et al. 2013 [42] Oregon, USA		McDonald NC, Yang Y, Abbott SM, Bullock AN. Impact of the safe routes to school program on walking and biking: Eugene. Oreg Study Transp Policy. 2013;29:243–8
622	61	McDonald et al. 2014 [43] Florida, Oregon, Texas, District of Columbia, USA		McDonald NC, Steiner RL, Lee C, Smith TR, Zhu X, Yang Y. Impact of the safe routes to school program on walking and bicycling. J Am Plan Assoc. 2014;80(2):153–67.
623	61	McMinn et al. 2012 [44] Glasgow, Scotland		McMinn D, Rowe DA, Murtagh S, Nelson NM. The effect of a school-based active commuting intervention on children's commuting physical activity and daily physical activity. Prev Med. 2012;54:316–8.
624	61	Mendoza et al. 2011 [45]		Mendoza JA, Watson K, Baranowski T, Nicklas TA, Uscanga DK, Hanfling MJ. The walking school bus and children’s physical activity: a pilot cluster randomized controlled trial. Pediatrics. 2011;128(3):e537–44.
625	61	Østergaard et al. 2015 [46]		Østergaard L, Støckel JT, Andersen LB. Effectiveness and implementation of interventions to increase commuter cycling to school: a quasi-experimental study. BMC Public Health. 2015;15:1199
626	61	Sayers et al. 2012 [47] Columbia, USA		Sayers SP, LeMaster JW, Thomas IM, Petroski GF, Ge B. A walking school bus program: impact on physical activity in elementary school children in Columbia, Missouri. Am J Prev Med. 2012;43(5S4):S384–9.
627	61	Stewart et al. 2014 [48] Florida, Mississippi, Washington, Wisconsin, USA		Stewart O, Moudon AV, Claybrooke C. Multistate evaluation of safe routes to school programs. Am J Health Promot. 2014;28(3S):S89–96.
628	61	Vanwolleghem et al.2014 [49]		Vanwolleghem G, D’Haese S, Van Dyck D, de Bourdeaudhuij I, Cardon G. Feasibility and effectiveness of drop-off spots to promote walking to school. Int J Behav Nutr Phys Act. 2014;11:136.
629	61	Villa-González et al., 2016) Spain		Villa-González E, Ruiz JR, Ward DS, Chillón P. Effectiveness of an active commuting school-based intervention at 6-month follow-up. Eur J Pub Health. 2016;26(2):272–6.
630	61	Xu et al. 2015 [51] China		Xu F, Ware RS, Leslie E, Tse LA, Wang Z, Li J, Wang Y. Effectiveness of a randomized controlled lifestyle intervention to prevent obesity among Chinese primary school students: CLICK-obesity study. PLoS One. 2015; 10(10):e0141421.
631	62	Buckley et al., 2013) USA (Moscow, Idaho)		Buckley, A., Lowry, M.B., Brown, H., Barton, B., 2013. Evaluating safe routes to school events that designate days for walking and bicycling. Transp. Policy 30, 294–300
632	62	Bungum et al., 2014) USA (Henderson,Nevada)		Bungum, T.J., Clark, S., Aguilar, B., 2014. The eﬀect of an active transport to school intervention at a suburban elementary school. Am. J. Health Educ. 45, 205–209.
633	62	Buliung et al., 2011) Canada		Buliung, R., Faulkner, G., Beesley, T., Kennedy, J., 2011. School travel planning: mobilizing school and community resources to encourage active school transportation. J. Sch. Health 81, 704–712.
634	62	Christiansen et al., 2014) Denmark (Region of Southern)		Christiansen, L.B., Toftager, M., Ersboll, A.K., Troelsen, J., 2014. Eﬀects of a Danish multicomponent physical activity intervention on active school transport. J. Transp. Health 1, 174–181.
635	62	Kong et al., 2010) USA (New Mexico Albuquerque)		Kong, A.S., Burks, N., Conklin, C., Roldan, C., Skipper, B., Scott, S., Sussman, A.L., Leggott, J., 2010. A pilot walking school bus program to prevent obesity in Hispanic elementary school children: role of physician involvement with the school commu- nity. Clin. Pediatr. (Phila) 49, 989–991
636	62	Sirard et al., 2015) USA (Minneapolis)		Sirard, J.R., McDonald, K., Mustain, P., Hogan, W., Helm, A., 2015. Eﬀect of a school choice policy change on active commuting to elementary school. Am. J. Health Promot. 30, 28–35
637	63	DOiT (van Nassau et al., 2013)		van Nassau F, Singh AS, van Mechelen W, Paulussen TG, Brug J, Chinapaw MJ. Exploring facilitating factors and barriers to the nationwide dissemination of a Dutch school-based obesity prevention program “DOiT”: a study protocol. BMC Public Health. 2013;13(1):1.
638	63	Health In Adolescents (Lien et al., 2010)		Lien N, Bjelland M, Bergh IH, Grydeland M, Anderssen SA, Ommundsen Y, Andersen LF, Henriksen HB, Randby J, Klepp K-I. Design of a 20-month comprehensive, multicomponent school-based randomised trial to promote healthy weight development among 11-13 year olds: the HEalth in adolescents study. Scand J Public Health. 2010;38(5 suppl):38–51.
639	63	Healthy Homework (Duncan et al., 2011)		Duncan S, McPhee JC, Schluter PJ, Zinn C, Smith R, Schofield G. Efficacy of a compulsory homework programme for increasing physical activity and healthy eating in children: the healthy homework pilot study. Int J Behav Nutr Phys Act. 2011;8(1):1.
639	63	Healthy Homework: RCT		Duncan et al. International Journal of Behavioral Nutrition and Physical Activity (2019)
640	63	It’s Your Move! (Mathew et al., 2010)		Mathews LB, Moodie MM, Simmons AM, Swinburn BA. The process evaluation of It's your move!, an Australian adolescent community-based obesity prevention project. BMC Public Health. 2010;10(1):1.
640	63	It’s Your Move!		Millar, Lynne, et al. "Reduction in overweight and obesity from a 3‐year community‐based intervention in Australia: the ‘It's Your Move!’project." obesity reviews 12 (2011): 20-28.
641	63	Safe Routes to School - Hawaii (Heinrich et al., 2011)		Heinrich KM, Dierenfield L, Alexander DA, Prose M, Peterson AC. Hawai ‘i's opportunity for active living advancement (HO ‘ĀLA): addressing childhood obesity through safe routes to school. Hawaii Med J. 2011;70(7 suppl 1):21.
642	63	Stockholm County Implementation (Elinder et al., 2012)		Elinder LS, Heinemans N, Hagberg J, Quetel A-K, Hagströmer M. A participatory and capacity-building approach to healthy eating and physical activity–SCIP-school: a 2-year controlled trial. Int J Behav Nutr Phys Act. 2012;9(1):1.
643	64	Borrestad et al. (2012)		Borrestad LAB, Ostergaard L, Andersen LB, Bere E. Experiences from a randomised, controlled trial on cycling to school: does cycling increase cardiorespiratory fitness?. Scand J Public Health 2012; 40: 245-252.
644	64	Groesz (2007)		Groesz LM. A conceptual evaluation of a school-based utilitarian exercise model [Doctor of Philosophy]. The University of Texas at Austin; 2008.
645	64	Heelan et al. (2009)		Heelan KA, Abbey BM, Donnelly JE, Mayo MS, Welk GJ. Evaluation of a walking school bus for promoting physical activity in youth. J Phys Act Health 2009; 6: 560-567.
646, 361, 143	64	Ming Wen et al. (2008)		Ming Wen L, Fry D, Merom D, Rissel C, Dirkis H, Balafas A. Increasing active travel to school: are we on the right track? A cluster randomised controlled trial from Sydney, Australia. Prev Med 2008; 47: 612-618.
651	65	Lambe (2015)		Lambe, B. The Effectiveness of Active Travel Initiatives in Irish Provincial Towns: An Evaluation of a Quasi-Experimental Natural Experiment; Waterford Institute of Technology: Waterford, Ireland, 2015.
652	65	Lambe et al. (2017)		Lambe, B.; Murphy, N.; Bauman, A. Active Travel to Primary Schools in Ireland: An Opportunistic Evaluation of a Natural Experiment. J. Phys. Act. Health 2017, 14, 448–454.
1169	169	An integrated and personalized traveler information and incentive scheme for energy efficient mobility systems		Xiong, Chenfeng, et al. "An integrated and personalized traveler information and incentive scheme for energy efficient mobility systems." Transportation Research Procedia 38 (2019): 160-179.
1176	176	The application of travel demand management initiatives within a university setting		Logan, Kathryn G., et al. "The application of travel demand management initiatives within a university setting." Case Studies on Transport Policy 8.4 (2020): 1426-1439.
1178	178	Quantified Traveler: Travel Feedback Meets the Cloud to Change Behavior		Jariyasunant, Jerald, et al. "Quantified traveler: Travel feedback meets the cloud to change behavior." Journal of Intelligent Transportation Systems 19.2 (2015): 109-124.
1185	185	Studying disruptive events: Innovations in behaviour, opportunities for lower carbon transport policy?		Marsden, Greg, et al. "Studying disruptive events: innovations in behaviour, opportunities for lower carbon transport policy?." Transport Policy 94 (2020): 89-101.
1196	196	School mobility management case study: German School of Oporto (Deutsche Schule zu Porto)		Teixeira, João Filipe, Cecília Silva, and João Valente Neves. "School mobility management case study: German school of Oporto (Deutsche Schule zu Porto)." Case studies on transport policy 7.1 (2019): 13-21.
1197	197	Effect of Information Provision to Following Vehicle on Reducing Amount of CO2 Emissions and Safety Drive		Matsumoto, Yukimasa, and Shogo Ishiguro. "Effect of Information Provision to Following Vehicle on Reducing Amount of CO2 Emissions and Safety Drive." Transportation Research Procedia 27 (2017): 93-100.
1200	200	Using Messages Targeting Psychological versus Physical Health Benefits to Promote Walking Behaviour: A Randomised Controlled Trial		Caso, Daniela, et al. "Using Messages Targeting Psychological versus Physical Health Benefits to Promote Walking Behaviour: A Randomised Controlled Trial." Applied Psychology: Health and Well‐Being (2020).
1201	201	Appraising an incentive only approach to encourage a sustainable reduction in private car trips in Dublin, Ireland		Carroll, Páraic, Brian Caulfield, and Aoife Ahern. "Appraising an incentive only approach to encourage a sustainable reduction in private car trips in Dublin, Ireland." International Journal of Sustainable Transportation (2020): 1-12.
1202	202	How short-term cycling training promotes cycling among schoolchildren in high-density cities		Loo, Becky PY, Kevin YK Leung, and Fasi CH Chan. "How short-term cycling training promotes cycling among schoolchildren in high-density cities." International journal of sustainable transportation 14.11 (2020): 872-885.
1203	203	Impacts of personalized accessibility information on residential location choice and travel behavior		Guo, Yuntao, and Srinivas Peeta. "Impacts of personalized accessibility information on residential location choice and travel behavior." Travel Behaviour and Society 19 (2020): 99-111.
1204	204	The Effects of Fare-Free Public Transport: A Lesson from FrATIN SMALL LETTER Y WITH ACUTEdek-Mistek (Czechia)		Štraub, Daniel. "The Effects of Fare-Free Public Transport: A Lesson from Frýdek-Místek (Czechia)." Sustainability 12.21 (2020): 9111.
1211	211	A personalized mobility based intervention to promote pro-environmental travel behavior		Ahmed, Shiraz, et al. "A personalized mobility based intervention to promote pro-environmental travel behavior." Sustainable Cities and Society 62 (2020): 102397.
1212	212	Experimental Evaluation of Information Interventions to Encourage Non-Motorized Travel: A Case Study in Hefei, China		Geng, Jichao, et al. "Experimental Evaluation of Information Interventions to Encourage Non-Motorized Travel: A Case Study in Hefei, China." Sustainability 12.15 (2020): 6201.
1214	214	A randomized controlled trial in travel demand management		Rosenfield, Adam, John P. Attanucci, and Jinhua Zhao. "A randomized controlled trial in travel demand management." Transportation 47.4 (2020): 1907-1932.
1215	215	Disaster and unplanned disruption: Personal travel planning and workplace relocation in Christchurch, New Zealand		Frater, Jillian, et al. "Disaster and unplanned disruption: Personal travel planning and workplace relocation in Christchurch, New Zealand." Case studies on transport policy 8.2 (2020): 500-507.		Check with authors about underlying numbers from Figure 2
1216	216	Shifting from Private to Public Transport using Duration-Based Modeling of a School-Based Intervention		Queiroz, Mariza Motta, Carlos Roque, and Filipe Moura. "Shifting from private to public transport using duration-based modeling of a school-based intervention." Transportation research record 2674.7 (2020): 540-554.
1217	217	Cycling for a Sustainable Future. Stimulating Children to Cycle to School via a Synergetic Combination of Informational and Behavioral Interventions		Van de Sompel, Dieneke, Liselot Hudders, and Lore Vandenberghe. "Cycling for a Sustainable Future. Stimulating Children to Cycle to School via a Synergetic Combination of Informational and Behavioral Interventions." Sustainability 12.8 (2020): 3224.
1218	218	More Cycling, Less Driving? Findings of a Cycle Street Intervention Study in the Rhine-Main Metropolitan Region, Germany		Blitz, Andreas, Annika Busch-Geertsema, and Martin Lanzendorf. "More Cycling, Less Driving? Findings of a Cycle Street Intervention Study in the Rhine-Main Metropolitan Region, Germany." Sustainability 12.3 (2020): 805.
1219	219	From mobility patterns to behavioural change: leveraging travel behaviour and personality profiles to nudge for sustainable transportation		Anagnostopoulou, Evangelia, et al. "From mobility patterns to behavioural change: leveraging travel behaviour and personality profiles to nudge for sustainable transportation." Journal of Intelligent Information Systems 54.1 (2020): 157-178.
1221	221	Moving to Private-Car-Restricted and Mobility-Served Neighborhoods: The Unspectacular Workings of a Progressive Mobility Plan		Johansson, Fredrik, Greger Henriksson, and Pelle Envall. "Moving to private-car-restricted and mobility-served neighborhoods: The unspectacular workings of a progressive mobility plan." Sustainability 11.22 (2019): 6208.
1222	222	A Large Scale, App-Based Behaviour Change Experiment Persuading Sustainable Mobility Patterns: Methods, Results and Lessons Learnt		Cellina, Francesca, et al. "A large scale, app-based behaviour change experiment persuading sustainable mobility patterns: methods, results and lessons learnt." Sustainability 11.9 (2019): 2674.
1223	223	Can we hope for a collective shift in electric vehicle adoption? Testing salience and norm-based interventions in South Tyrol, Italy		DellaValle, Nives, and Alyona Zubaryeva. "Can we hope for a collective shift in electric vehicle adoption? Testing salience and norm-based interventions in South Tyrol, Italy." Energy Research & Social Science 55 (2019): 46-61.
1224	224	Teaming up for sustainability: Promoting sustainable mobility behaviour through sports clubs in Switzerland		Moser, Corinne, et al. "Teaming up for sustainability: Promoting sustainable mobility behaviour through sports clubs in Switzerland." Energy Research & Social Science 53 (2019): 89-97.
1225	225	Play&Go, an Urban Game Promoting Behaviour Change for Sustainable Mobility		Ferron, Michela, et al. "Play&Go, an urban game promoting behaviour change for sustainable mobility." Interaction Des. Archit. J 40 (2019): 24-25.
1227	227	Applying a motivational stage-based approach in order to study a temporary free public transport intervention		Friman, Margareta, Raphaela Maier, and Lars E. Olsson. "Applying a motivational stage-based approach in order to study a temporary free public transport intervention." Transport Policy 81 (2019): 173-183.
1230	230	The role of habit and residential location in travel behavior change programs, a field experiment		Ralph, Kelcie M., and Anne E. Brown. "The role of habit and residential location in travel behavior change programs, a field experiment." Transportation 46.3 (2019): 719-734.
1232	232	Modal Shift from Car to Bus: A French Case Study in a Rural Context Based on an Integrated Psychosocial Approach		Castel, Davy, et al. "Modal Shift from Car to Bus: A French Case Study in a Rural Context Based on an Integrated Psychosocial Approach." Transportation Journal 58.3 (2019): 149-167.
1233	233	Importance of motives, self-efficacy, social support and satisfaction with travel for behavior change during travel intervention programs		Skarin, Frida, et al. "Importance of motives, self-efficacy, social support and satisfaction with travel for behavior change during travel intervention programs." Transportation research part F: traffic psychology and behaviour 62 (2019): 451-458.
1234	234	Association between innovative dockless bicycle sharing programs and adopting cycling in commuting and non-commuting trips		Jia, Yingnan, and Hua Fu. "Association between innovative dockless bicycle sharing programs and adopting cycling in commuting and non-commuting trips." Transportation research part A: policy and practice 121 (2019): 12-21.
1235	235	The relationship between financial incentives provided by employers and commuters' decision to use transit: Results from the Atlanta Regional Household Travel Survey		Ghimire, Ramesh, and Colby Lancelin. "The relationship between financial incentives provided by employers and commuters' decision to use transit: Results from the Atlanta Regional Household Travel Survey." Transport Policy 74 (2019): 103-113.
1236	236	On target? Examining the effects of information displays on household energy and travel behaviour in Oxford, United Kingdom		Al-Chalabi, Malek, David Banister, and Christian Brand. "On target? Examining the effects of information displays on household energy and travel behaviour in Oxford, United Kingdom." Energy research & social science 44 (2018): 278-290.
1238	238	The role of incentives towards adolescents' commitment to use public transport in Malaysia		Abdul Sukor, Nur Sabahiah, Nur Khairiyah Basri, and Ari KM Tarigan. "The role of incentives towards adolescents’ commitment to use public transport in Malaysia." Transportation planning and technology 41.3 (2018): 301-318.
1241	241	FROM CAR TO BIKE: MARKETING AND DIALOGUE AS A DRIVER OF CHANGE		MARTINEZ, ANDRES GARCIA, et al. "FROM CAR TO BIKE: MARKETING AND DIALOGUE ASA DRIVER OF CHANGE." Urban Transport XXIII 176 (2017): 221.
1244	244	The influence of information-based Transport Demand Management measures on commuting mode choice. Comparing web vs. face-to-face surveys		e Silva, João de Abreu, Claire Papaix, and Guineng Chen. "The influence of information-based Transport Demand Management measures on commuting mode choice. Comparing web vs. face-toface surveys." Transportation Research Procedia 32 (2018): 363-373.
1246	246	Modal Share Change following Implementation of Travel Demand Management Strategies		Piras, Francesco, Eleonora Sottile, and Italo Meloni. "Modal share change following implementation of travel demand management strategies." Transportation Research Record 2672.8 (2018): 731-741.
1247	247	Effects of a Travel Behaviour Change Program on Sustainable Travel		Ruiz, Tomás, et al. "Effects of a travel behaviour change program on sustainable travel." Sustainability 10.12 (2018): 4610.
1248	248	Selective psychological effects of nudging, gamification and rational information in converting commuters from cars to buses: A controlled field experiment		Lieberoth, Andreas, Niels Holm, and Thomas Bredahl. "Selective psychological effects of nudging, gamification and rational information in converting commuters from cars to buses: A controlled field experiment." (2018).
1249	249	The effectiveness of an intervention to promote active travel modes in early adolescence		Stark, Juliane, Wolfgang J. Berger, and Reinhard Hössinger. "The effectiveness of an intervention to promote active travel modes in early adolescence." Transportation research part F: traffic psychology and behaviour 55 (2018): 389-402.
1252	252	Multinomial logit analysis of the effects of five different app-based incentives to encourage cycling to work		Huang, Bingyuan, et al. "Multinomial logit analysis of the effects of five different app-based incentives to encourage cycling to work." IET Intelligent Transport Systems 12.10 (2018): 1421-1432.
1254	254	Comparing Types of Financial Incentives to Promote Walking: An Experimental Test		Burns, Rachel J., and Alexander J. Rothman. "Comparing types of financial incentives to promote walking: An experimental test." Applied Psychology: Health and Well‐Being 10.2 (2018): 193-214.
1255	255	Trip Characteristics Analysis of the Effects of a Travel Behavior Change Program		Arroyo, Rosa, et al. "Trip characteristics analysis of the effects of a travel behavior change program." Transportation Research Record 2672.47 (2018): 146-158.
1257	257	The prospects of fare-free public transport: evidence from Tallinn		Cats, Oded, Yusak O. Susilo, and Triin Reimal. "The prospects of fare-free public transport: evidence from Tallinn." Transportation 44.5 (2017): 1083-1104.
1258	258	Lessons learned from a personalized travel planning (PTP) research program to reduce car dependence		Meloni, Italo, Benedetta Sanjust Di Teulada, and Erika Spissu. "Lessons learned from a personalized travel planning (PTP) research program to reduce car dependence." Transportation 44.4 (2017): 853-870.
1259	259	Giving up cars - The impact of a mobility experiment on carbon emissions and everyday routines		Laakso, Senja. "Giving up cars–The impact of a mobility experiment on carbon emissions and everyday routines." Journal of Cleaner Production 169 (2017): 135-142.
1260	260	Can Social Comparison Feedback Affect Indicators of Eco-Friendly Travel Choices ? Insights from Two Online Experiments		Doran, Rouven, Daniel Hanss, and Torvald Øgaard. "Can social comparison feedback affect indicators of eco-friendly travel choices? Insights from two online experiments." Sustainability 9.2 (2017): 196.
1262	262	A push to cycling exploring the e-bike's role in overcoming barriers to bicycle use with a survey and an intervention study		Fyhri, Aslak, et al. "A push to cycling—exploring the e-bike's role in overcoming barriers to bicycle use with a survey and an intervention study." International journal of sustainable transportation 11.9 (2017): 681-695.
1264	264	Painting the fence: Social norms as economic incentives to nonautomotive travel behavior		Riggs, William. "Painting the fence: Social norms as economic incentives to non-automotive travel behavior." Travel Behaviour and Society 7 (2017): 26-33.
1266	266	Social marketing and the built environment: What matters for travel behaviour change?		Ma, Liang, Corinne Mulley, and Wen Liu. "Social marketing and the built environment: What matters for travel behaviour change?." Transportation 44.5 (2017): 1147-1167.
1268	268	The effects of the multimodal real time information systems on the travel behaviour		Pronello, Cristina, José Pedro Ramalho Veiga Simão, and Valentina Rappazzo. "The effects of the multimodal real time information systems on the travel behaviour." Transportation research procedia 25 (2017): 2677-2689.
1269	269	Promoting sustainable travel modes for commute tours: A comparison of the effects of home and work locations and employer-provided incentives		Dong, Hongwei, Liang Ma, and Joseph Broach. "Promoting sustainable travel modes for commute tours: A comparison of the effects of home and work locations and employer-provided incentives." International Journal of Sustainable Transportation 10.6 (2016): 485-494.
1270	270	Impact of information intervention on travel mode choice of urban residents with different goal frames: A controlled trial in Xuzhou, China		Geng, Jichao, Ruyin Long, and Hong Chen. "Impact of information intervention on travel mode choice of urban residents with different goal frames: A controlled trial in Xuzhou, China." Transportation Research Part A: Policy and Practice 91 (2016): 134-147.
1274	274	The Effect of Free Bus Ticket Policy on Bus Taking Behaviors of Motorcyclists: Examining from the Electronic Ticket		Lai, Wen-Tai, and Huai-Zhi Sheu. "The Effect of Free Bus Ticket Policy on the Bus Taking Behaviors of Motorcyclists: Examining the Electronic Tickets." Bridging the East and West. 2016. 263-271.
1275	275	Cycling promotion schemes and long-term behavioural change: A case study from the University of Sheffield		Uttley, J., and R. Lovelace. "Cycling promotion schemes and long-term behavioural change: A case study from the University of Sheffield." Case studies on transport policy 4.2 (2016): 133-142.
1277	277	BIKE TO WORK DAY: A POTENTIAL TOOL FOR PLANNING AND FOSTERING SUSTAINABLE MOBILITY		Patricio, Luis Claudio Brito, and Leandro Kruszielski. "BIKE TO WORK DAY: A POTENTIAL TOOL FOR PLANNING AND FOSTERING SUSTAINABLE MOBILITY/DIA DE BICICLETA AO TRABALHO: UMA POTENCIAL FERRAMENTA PARA PLANEJAMENTO E PROMOCAO DA MOBILIDADE SUSTENTAVEL/LA BICICLETA PARA EL DIA DE TRABAJO: UNA HERRAMIENTA PARA LA PLANIFICACION Y PROMOCION DE MOVILIDAD SOSTENIBLE." Revista de Gestão Ambiental e da Sust…
1279	279	Understanding travel behaviour change during mega-events: Lessons from the London 2012 Games		Parkes, Stephen D., Ann Jopson, and Greg Marsden. "Understanding travel behaviour change during mega-events: Lessons from the London 2012 Games." Transportation Research Part A: Policy and Practice 92 (2016): 104-119.
1281	281	Free public transport: A socio-cognitive analysis		Cools, Mario, Yannick Fabbro, and Tom Bellemans. "Free public transport: A socio-cognitive analysis." Transportation Research Part A: Policy and Practice 86 (2016): 96-107.
1282	282	Effect of travel behaviour change programmes on time allocated to driving		García-Garcés, Pablo, Tomás Ruiz, and Khandker MN Habib. "Effect of travel behaviour change programmes on time allocated to driving." Transportmetrica A: Transport Science 12.1 (2016): 1-19.
1283	283	An impact assessment of a travel behavior change program: A case study of a light rail service in Cagliari, Italy		Sanjust, Benedetta, Italo Meloni, and Erika Spissu. "An impact assessment of a travel behavior change program: a case study of a light rail service in Cagliari, Italy." Case Studies on Transport Policy 3.1 (2015): 12-22.
1285	285	Using Gamification to Incentivize Sustainable Urban Mobility		Kazhamiakin, Raman, et al. "Using gamification to incentivize sustainable urban mobility." 2015 IEEE first international smart cities conference (ISC2). IEEE, 2015.
1286	286	When Nudges Aren’t Enough: Incentives and Habit Formation in Public Transport Usage		Christina Gravert, Linus Olsson Collentine, "When Nudges Aren’t Enough: Incentives and Habit Formation in Public Transport Usage" Journal of Economic Behavior & Organization Volume 190, October 2021, Pages 1-14
1287	287	Garcia-Sierra, M., van den Bergh, J. & Miralles-Guasch, C. (2015)	own addition	Garcia-Sierra, Marta, Jeroen CJM van den Bergh, and Carme Miralles-Guasch. "Behavioural economics, travel behaviour and environmental-transport policy." Transportation Research Part D: Transport and Environment 41 (2015): 288-305.
9999		Lambeth	Cairns et al., (2010)	page 125
3901	21.039	Engaging higher education institutions in the challenge of sustainability		Hancock, L., & Nuttman, S. (2013). Engaging higher education institutions in the challenge of sustainability: Sustainable transport as a catalyst for action. Journal of Cleaner Production, 62, 62–71.
3902	21.039	Workplace travel plans—A new rule of the game		Baker, L. (2007). Workplace travel plans—A new rule of the game. Paper presented to New Zealand Planning Institute and EAROPH Conference, Palmerston North, New Zealand.
3903	21.039	Mandatory employer-based trip reduction: What happened?		Dill, J. (1998). Mandatory employer-based trip reduction: What happened? Transportation Research Record: Journal of the Transportation Research Board, 1618, 103–110.
3904	21.039	Can school travel plans change the way children commute?		Hinckson, E., Duncan, S., & Badland, H. (2009). Can school travel plans change the way children commute? Journal of Science and Medicine in Sport, 12.
3905	21.039	A systematic review of children’s travel behaviour change programs in Australia.		Moghtaderi, F., Burke, M., & Dodson, J. (2012). A systematic review of children’s travel behaviour change programs in Australia. Paper presented to 35th Australasian Transport Research Forum (ATRF), Perth, Australia
3906	21.039	Evaluation of the TravelSmart local government and workplace programs.		Marsden Jacob Associates. (2011). Evaluation of the TravelSmart local government and workplace programs. Perth, Australia: WA Department of Transport
3907	21.039	Employee trip reduction without government mandates: Cost and effectiveness estimates from Chicago.		Pagano, A., & Verdin, J. (1997). Employee trip reduction without government mandates: Cost and effectiveness estimates from Chicago. Transportation Research Record: Journal of the Transportation Research Board, 1598, 43–48.
3908	21.039	Simple and suited: Guidelines for workplace travel surveys.		Ampt, E. S., Richardson, A. J., & Wake, D. (2009). Simple and suited: Guidelines for workplace travel surveys. Paper presented to 32nd Australasian Transport Research Forum (ATRF), Auckland, New Zealand.
3909	21.039	How do we know employer-based transportation demand management works? The need for experimental design.		Higgins, T. (1996). How do we know employer-based transportation demand management works? The need for experimental design. Transportation Research Record: Journal of the Transportation Research Board, 1564, 54–59.
3910	21.039	Evaluating workplace travel plans.		Wake, D., Thom, A., & Cummings, R. (2010). Evaluating workplace travel plans. Paper presented to 33rd Australasian Transport Research Forum (ATRF), Canberra, Australia.
3911	21.039	Integrating travel behaviour change for workers, shoppers and residents at an outer suburban centre.		Wiblin, S. (2010). Integrating travel behaviour change for workers, shoppers and residents at an outer suburban centre. Paper presented to 33rd Australasian Transport Research Forum (ATRF), Canberra, Australia.
3912	21.039	Sustainable Transport: A Sourcebook for Policy-makers in Developing Cities	not available	Wright, L. (2005). Sustainable Transport: A Sourcebook for Policy-makers in Developing Cities Module 3e Car-Free Development, Deutsche Gesellschaft fur Technische Zusammenarbeit (GTZ) GmbH. Eschborn, Germany: Federal Ministry for Economic Cooperation and Development
3913	21.039	Potential for carfree development in the UK.		Melia, S. (2009). Potential for carfree development in the UK. PhD Thesis, University of West England.
3914		Enoch, M. (2012). Sustainable transport, mobility management and travel plans. Surrey, England: Ashgate Publishing Limited.		Enoch, M. (2012). Sustainable transport, mobility management and travel plans. Surrey, England: Ashgate Publishing Limited.
3915		Enoch, M., & Potter, S. (2003). Encouraging the commercial sector to help employees change their travel behaviour. Transport Policy, 10, 51–58.		Enoch, M., & Potter, S. (2003). Encouraging the commercial sector to help employees change their travel behaviour. Transport Policy, 10, 51–58.
3916		Enoch, M., & Rye, T. (2006). Travel plans: Using good practice to inform future policy. In B. Jourquin, P. Rietveld, & K. Westin (Eds.), Towards better performing transport networks (pp. 157–177). London, UK: Routledge.		Enoch, M., & Rye, T. (2006). Travel plans: Using good practice to inform future policy. In B. Jourquin, P. Rietveld, & K. Westin (Eds.), Towards better performing transport networks (pp. 157–177). London, UK: Routledge.
3917		Ferguson, E. (2000). Travel demand management and public policy. England: Ashgate Publishing.		Ferguson, E. (2000). Travel demand management and public policy. England: Ashgate Publishing.
3918		Fraser, J., & Addison, L. (2002). Travel plans—A greenwash or an effective planning mechanism. Town and Country Planning, 275–277.		Fraser, J., & Addison, L. (2002). Travel plans—A greenwash or an effective planning mechanism. Town and Country Planning, 275–277.
3919		Myers, K. (2005). Travel behaviour change initiatives: A local government’s innovations. Paper presented to 28th Australasian Transport Research Forum (ATRF), Sydney, Australia.		Myers, K. (2005). Travel behaviour change initiatives: A local government’s innovations. Paper presented to 28th Australasian Transport Research Forum (ATRF), Sydney, Australia.

## Sheet: Sample details
Uniq	code_use	code	project	no results	Potential Duplicates	y.o.p	y.o.i	treatment	sample_n	N-desc	data_type	data_source	age	M / F	city	(region) city_coded	country	Region	Pop_city	year_pop_city_estimate	pop_city_estimate	pop_city_comment	data_collection_method	sampling_techniques	survey_period	Frequency_of_sampling	Response rate	Attrition rate	Frequency_details	Data collection_date_details	after_intervention_data (duration)	Study_design	Methods	control_group_type	control_group_type_comment	design comment	measures	context	info type	Study_design_code	Study_design_code_2	Randomization; selection	control	control_type	Pre- and post- data	Follow-up	Comparability (C & T)	Control for confounders	Sampling Biases
1	14	1	Stepchange pilot			2004			1754	1754					Bishopbriggs, Paisley and Inverurie, Scotland	Paisley	Scotland	UK		2021	76220	Bishopbriggs not found Paisley 76220 Inverurie not found	surveys							Of households approached, 1754 engaged in an activity (56%)		BA	surveys						2	BA	BA
2	14	2	Enﬁeld TfL pilot			2004			235	235 (565 households)					Enﬁeld TfL	London	UK	UK		2001	277300	https://www.citypopulation.de/en/uk/admin/						0.373043		1000 households target; 2619 attempted contacts; 977 contacts made		BA							2	BA	BA
3	14	3	Holland Park		294	2003			102	600 households					Holland Park	NI	Australia	Australia		2016	8111	https://quickstats.censusdata.abs.gov.au/census_services/getproduct/census/2016/quickstat/SSC31359										BA							3	BA	BA						NI	NI	NI
4	14	4	Dulwich		293	2003			515	515; (1000 households)					Dulwich	Dulwich	Australia	Australia		2016	1678	https://quickstats.censusdata.abs.gov.au/census_services/getproduct/census/2016/quickstat/SSC40375										BA							3	BA	BA						NI	NI	NI
5	14	5	Liverpool		47	2003			32	32					Liverpool	Liverpool	UK	UK		2003	853672											BA							3	BA	BA						NI	NI	NI
6	14	6	Reggio Emilia			2003			691	691					Reggio Emilia	Reggio Emilia	Italy	EU		2003	292570											BA							3	BA	BA						NI	NI	NI
7	14	7	Porto			2003			421	421					Porto	Porto	Portugal	EU		2003	1266744											BA							3	BA	BA						NI	NI	NI
8	14	8	Kassel			2003			13012	13012					Kassel	Kassel	Germany	EU		2011	190800											BA							3	BA	BA						NI	NI	NI
9	14	9	Luxembourg			2003			230	230					Luxembourg	Luxembourg	Luxembourg	EU		2001	76688											BA							3	BA	BA						NI	NI	NI
10	14	10	Stuttgart-Freiberg			2003			5330	5330					Stuttgart-Freiberg	Stuttgart, Freiberg	Germany	EU		2003 2021		Stuttgart 588818 Freiberg 43670										BA							3	BA	BA						NI	NI	NI
11	14	11	Marangaroo		290	2004			201	201					Marangaroo, suburb of Perth	Perth	Australia	Australia	10000													BA							2	BA	BA						NA	NA	NA
12	14	12	South Perth			2003			1000	1000					South Perth	Perth	Australia	Australia		2001	37606	https://www.citypopulation.de/en/australia/admin/	surveys	Random sample surveys								BA							3	BA	BA						NI	NI	NI
13	14	13	Bern A			2003			247	247					Bern	Bern	Switzerland	EU		2003	358932											BA							3	BA	BA						NI	NI	NI
14	14	14	Frome			2003			500	500					Frome	Frome	UK	UK		2001	24510	https://citypopulation.de/en/uk/southwestengland/somerset/E34000692__frome/										BA							3	BA	BA						NI	NI	NI
15	14	15	Oslo			2003			1153	1153					Oslo	Oslo	Norway	EU		2003	797599											BA							3	BA	BA						NI	NI	NI
16	14	16	Christies Beach			2003			215	215					Christies Beach	Christies Beach	Australia	Australia		2001	4866	https://profile.id.com.au/onkaparinga/population?WebID=140&EndYear=2001&DataType=UR										BA							3	BA	BA						NI	NI	NI
17	14	17	Lisbon			2003			548	548					Lisbon	Lisbon	Portugal	EU		2003	2714041											BA							3	BA	BA						NI	NI	NI
18	14	18	Copenhagen A			2003			585	585					Copenhagen A,	Copenhagen	Denmark	EU		2003	1102529											BA							3	BA	BA						NI	NI	NI
19	14	19	York (12 h day)		46	2004			500	500					York	York	UK	UK		2001	181131											BA						‘hard’ measures combined	2	BA	BA						NA	NA	NA
20	14	20	Cologne			2003			235	235					Cologne,	Cologne	Germany	EU		2003	967299											BA							3	BA	BA						NI	NI	NI
21	14	21	Linz			2003			15141	15141					Linz	Linz	Austria	EU		2001	183504											BA							3	BA	BA						NI	NI	NI
22	14	22	Lisbon			2003			548	548					Lisbon	Lisbon	Portugal	EU		2003	2714041											BA							3	BA	BA						NI	NI	NI
23	14	23	Wiesbaden			2003			4632	4632					Wiesbaden	Wiesbaden	Germany	EU		2011	269121											BA		control, no specific					3	BA	BA						NI	NI	NI
24	14	24	East Hampshire 2003			2004			1000	1000 (1115 in the before survey and 956 in the after survey)					East Hampshire,	Hampshire	UK	UK		2021	119932	https://www.easthants.gov.uk/in-profile	surveys									BA	questionnaires						2	BA	BA						NA	NA	NA
25	14	25	Bishopsworth/ Hartcliffe project I			2004			2500	2500					Bishopsworth/ Hartcliffe,	Bishopsworth, Hartcliffe	UK	UK				city not found										BA based on survey years; control group not mentioned explicitly				BA based on survey years; control group not mentioned explicitly		relatively low-income edge of city	2	BA	BA						NA	NA	NA
26	14	26	Quedgeley pilot			2004			177	515 people target; 496 people reached 871 people, 187 people					Quedgeley, Gloucester	Gloucester	Australia	Australia				city not found Gloucester UK (district) 150000										BA based on survey years; control group not mentioned explicitly				BA based on survey years; control group not mentioned explicitly			2	BA	BA						NA	NA	NA
27	14	27	Arnhem			2003			106	106					Arnhem	Arnhem	Netherlands	EU		2021	141674											BA based on survey years; no other information available				BA based on survey years; no other information available			3	unclear	unclear						NI	NI	NI
28	14	28	Munich			2003			229	229					Munich	Munich	Germany	EU		2003	1241247											BA based on survey years; no other information available				BA based on survey years; no other information available			3	unclear	unclear						NI	NI	NI
29	14	29	Cambridge (UK)			2004			400	400					Cambridge	Cambridge	UK	UK		2021	129000											BA based on survey years; no other information available				BA based on survey years; no other information available			2	BA	BA						NA	NA	NA
30	14	30	Bremen (Germany)			2003			189	189					Bremen	Bremen	Germany	EU		2003	543917											BA based on survey years; no other information available							3	unclear	unclear						NI	NI	NI
31	14	31	Salzburg (Austria)			2003			5500	5500					Salzburg	Salzburg	Austria	EU		2001	142662											BA based on survey years; no other information available							3	unclear	unclear						NI	NI	NI
32	14	32	Bishopston (UK)			2004			5364	5364					Bishopston, Bristol	Bristol	UK	UK		2021		Bishopston not found Bristol 617280										CBA based on table mention (page 118); no other information available							2	CBA	CBA						NA	NA	NA
33	14	33	Borken (Germany)			2003			410	410					Borken	Borken	Germany	EU		2021	40876											BA based on survey years; no other information available							3	unclear	unclear						NI	NI	NI
34	14	34	Delft/Den Haag (Netherlands)			2003			124	124					Delft/Den Haag	Delft, Den Haag	Netherlands	EU		2021 2003		Delft 95060 Den Haag 616231										BA based on survey years; no other information available							3	unclear	unclear						NI	NI	NI
35	14	35	Halle (Germany)			2003			154	154					Halle	Halle	Germany	EU		2011	229200											BA based on survey years; no other information available							3	unclear	unclear						NI	NI	NI
36	14	36	Armandale (UK)			2004			210	210					Armandale	Armandale	UK	UK														BA based on survey years; no other information available							2	BA	BA						NA	NA	NA
37	14	37	Frementle (France)			2004			615	615					Frementle	Frementle	France	EU				city not found (there's a Fremantle, Australia)										BA based on survey years; no other information available							2	BA	BA						NA	NA	NA
38	14	38	Bristol VIVALDI phase 1 (UK)			2004			232	232					Bristol	Bristol	UK	UK		2004	571462											CBA			adjusted for changes in the behaviour of the control group	control group outcomes not reported			2	CBA	CBA		Yes				NA	NA	NA
39	14	39	Helsinki (Finland)			2003			176	176					Helsinki	Helsinki	Finland	EU		2003	1049206											CBA			adjusted for changes in the behaviour of the control group	control group outcomes not reported			3	CBA	CBA		Yes				NI	NI	NI
40	14	40	Gloucester (UK)			2003			445	445					Gloucester	Gloucester	UK	UK		2016	128500											CBA based on table mention (page 118); no other information available							3	CBA	unclear						NI	NI	NI
41	14	41	Montpellier (France)			2003			411	411					Montpellier	Montpellier	France	EU		2003	366033											BA based on survey years; no other information available							3	unclear	unclear						NI	NI	NI
42	14	42	Pinneberg (Germany)			2003			501	501					Pinneberg	Pinneberg	Germany	EU		2021	40577											BA based on survey years; no other information available							3	unclear	unclear						NI	NI	NI
43	14	43	Leipzig (Germany)			2003			188	188					Leipzig	Leipzig	Germany	EU		2003	496157											BA based on survey years; no other information available							3	unclear	unclear						NI	NI	NI
44	14	44	Magdeburg (Germany)			2003			212	212					Magdeburg	Magdeburg	Germany	EU		2011	228144											BA based on survey years; no other information available							3	unclear	unclear						NI	NI	NI
45	14	45	Hannover-Südstadt (Germany)			2003			40990	40990					Hannover-Südstadt	Hannover	Germany	EU		2003		Hannover 528218										BA based on survey years; no other information available							3	unclear	unclear						NI	NI	NI
46	14	46	York (morning peak) (UK)		19	2004			500	500					York	York	UK	UK		2001	181131											BA based on survey years; no other information available						‘hard’ measures combined	2	BA	BA						NA	NA
47	14	47	Liverpool (UK)		5	2003			33	33					Liverpool	Liverpool	UK	UK		2003	853672											BA based on survey years; no other information available							3	unclear	unclear						NI	NI	NI
48	14	48	Quedgeley large scale 2004 (2)			2004			954	954					Quedgeley	Quedgeley	UK	UK				city not found Gloucester UK (district) 150000										BA based on survey years; control group not mentioned explicitly							2	BA	BA						NA	NA
49	14	49	Frome pilot (UK)			2004			282	282					Frome	Frome	UK	UK		2001	24510	https://citypopulation.de/en/uk/southwestengland/somerset/E34000692__frome/										CBA based on table mention (page 118); no other information available							2	CBA	CBA						NA	NA
50	14	50	Melville (Australia)			2004			634	634					Melville	Melville	Australia	Australia		2006	96778	https://www.citypopulation.de/en/australia/admin/										BA based on survey years; no other information available							2	BA	BA						NA	NA
51	14	51	Bern B (Swiss)			2003			27	27					Bern	Bern	Switzerland	EU		2003	358932											BA based on survey years; no other information available							3	unclear	unclear						NI	NI	NI
52	14	52	Ludwigshafen (Germany)			2003			197	197					Ludwigshafen	Ludwigshafen	Germany	EU		2011	157584											BA based on survey years; no other information available							3	unclear	unclear						NI	NI	NI
53	14	53	Subiaco (Australia)			2004			400	400					Subiaco	Subiaco	Australia	Australia	15000													BA							2	BA	BA						NA	NA
54	14	54	Brisbane (Australia)			2003			1100	1100					Brisbane	Brisbane	Australia	Australia		2003	1703189											BA							2	BA	BA						NI	NI	NI
5502	14	55	Dalvik				1998								Dalvik	Dalvik	Sweden	EU																control, no specific					3	BA	BA
5501	14	55	Nürnberg				1996		4940						Nürnberg	Nürnberg	Germany	EU	500000		499237		survey		1996-2004									control, no specific					3	BA	BA						NI	NI	NI
55	14	55	Nürnberg (Germany)			2003			4940	4940					Nürnberg	Nürnberg	Germany	EU		2021	499237											CBA		control, no specific					2	CBA	CBA						NI	NI	NI
5503	14	55	Viernheim				2001								Viernheim	Viernheim	Germany	EU																control, no specific					3	BA	BA
56	14	56	Vincent (Australia)			2004			409	409					Vincent	Vincent	Australia	Australia		2006	29261	https://www.citypopulation.de/en/australia/admin/										BA based on survey years; no other information available							2	BA	BA						NA	NA
57	14	57	South Perth (Australia)			2004			706	706					South Perth	Perth	Australia	Australia		2006	40517	https://www.citypopulation.de/en/australia/admin/	survey									BA							2	BA	BA						NA	NA
58	14	58	Venice (Italy)			2003			742	742					Venice	Venice	Italy	EU		2011	261362											BA based on survey years; no other information available							3	unclear	unclear						NI	NI	NI
59	14	59	Vollmar (Germany)			2003			5655	5655					Vollmar	Vollmar	Germany	EU				city not found										BA based on survey years; no other information available							3	unclear	unclear						NI	NI	NI
60	14	60	Bologna (Italy)			2003			681	681					Bologna	Bologna	Italy	EU		2003	730747											BA based on survey years; no other information available							3	unclear	unclear						NI	NI	NI
61	14	61	Gloucester largescale (UK)			2004			2018	2018					Gloucester	Gloucester	UK	UK		2016	128500						0.5					CBA			adjusted for changes in the behaviour of the control group	control group outcomes not reported			2	CBA	CBA		Yes				NA	NA
62	14	62	Gloucester pilot (UK)			2004			187	187					Gloucester	Gloucester	UK	UK		2016	128500						0.38					BA							2	BA	BA						NA	NA
63	14	63	Madrid (Spain)			2003			382	382					Madrid	Madrid	Spain	EU		2003	5229816											BA based on survey years; no other information available							3	unclear	unclear						NI	NI	NI
64	14	64	Baunatal (Germany)			2003			6918	6918					Baunatal	Baunatal	Germany	EU														BA based on survey years; no other information available							3	unclear	unclear						NI	NI	NI
65	14	65	Bristol Bishopston (UK)			2004			5364	5364					Bristol Bishopston	Bristol	UK	UK				city not found										CBA based on table mention (page 118); no other information available							2	CBA	CBA						NA	NA
66	14	66	Hampshire (UK)			2004			162	162					Hampshire (county)	Hampshire	UK	UK		2001	1241400	https://www.citypopulation.de/en/uk/admin/										BA based on survey years; no other information available							2	BA	BA						NA	NA
67	14	67	Kingston TfL pilot (UK)			2004			793	793					Kingston	Kingston	UK	UK		2004		city not clear Kingston upon Hull 305396 Kingston upon Thames data not found					0.916364					CBA			adjusted for changes in the behaviour of the control group	control group outcomes not reported			2	CBA	CBA		Yes				NA
68	14	68	Turin (Italy)			2003			213	213					Turin	Turin	Italy	EU		2003	1694378											BA based on survey years; no other information available							3	unclear	unclear						NI	NI	NI
69	14	69	Parma (Italy)			2003			721	721					Parma	Parma	Italy	EU		2003	281438											BA based on survey years; no other information available							3	unclear	unclear						NI	NI	NI
70	14	70	Southwark TfL pilot (UK)			2004			257	257					Southwark (Greater London Borough)	London	UK	UK		2001	256700	https://www.citypopulation.de/en/uk/admin/					0.142778					BA				unclear whether changes in the behaviour of the control group have been taken into account			2	BA	BA						NA
71	14	71	Buckinghamshire County (UK)			2004			3000	3000					Buckinghamshire County	Buckinghamshire	UK	UK																					3	unclear	unclear						NA
72	14	72	Bike Busters (UK)			2004			175	175							UK	UK																					3	unclear	unclear						NA
73	14	73	Boots (UK)			2010			7500	7500				no bias	Boots	Boots	UK	UK				city not found	Staff travel survey		53					1995-06-01	1999-11-01	BA					Changes in cars per 100 staff inferred from changes in gate counts	Outer suburbs	2	BA	BA						NA
74	14	74	Oxford Radcliffe Hospitals NHS Trust (UK)			2010			5170	5170				>70% female	Oxford Radcliffe Hospitals	Oxford	UK	UK		2016	161300	data for Oxford (city)	Staff travel surveys		12	2				2000-03-01	2001-03-01	BA					Cars per 100 staff directly inferred from the number of car drivers	Outer suburbs	2	BA	BA						NA
75	14	75	Stockley Park (UK)			2010			7700	7700				no bias	Stockley Park	London	UK	UK				city not clear	Staff travel surveys		24	2				1997-10-01	1999-10-01	BA					percentage of staff arriving as a car driver on a typical day	Outer suburbs	2	BA	BA						NA
76	14	76	Agilent Technologies (UK)			2010			1500	1500				no bias	Agilent Technologies	NI	UK	UK				city not clear	Staff travel surveys		24	2				1997-11-01	1999-11-01	BA					Number of cars per 100 staff inferred from the number of single occupancy vehicles	Rural	2	BA	BA						NA
77	14	77	Government Office for the East Midlands			2010			245	245				no bias	Gov. Ofﬁce for the East Midlands	East Midlands	UK	UK		2011	3670500	data for East Midlands (UK) https://ec.europa.eu/eurostat/databrowser/view/LFST_R_LFSD2POP__custom_1360525/default/table?lang=en	Staff travel surveys		24	2	76		Dec 1997 (70% response), Dec 1999 (76% response)	1997-12-01	1999-12-01	BA					Cars per 100 staff directly inferred from the number of car drivers	Town centre	2	BA	BA						NA
78	14	78	Pfizer			2010			5500	5500				no bias	Pﬁzer	NI	UK	UK				city not clear	Staff travel surveys		36	2				1998-04-01	2001-04-01	BA					percentage of staff arriving as a car driver on a typical day	Rural	2	BA	BA						NA
79	14	79	Egg (UK)			2010			880	880				no bias	Egg	NI	UK	UK				city not found	directly counted for cars+ others inferred		16				range of monitoring exercises	1999-09-01	2001-01-01	BA					number of cars per 100 staff was directly counted, whilst use of other modes was inferred from a number of other indicators.	Edge of town centre/inner suburbs	2	BA	BA						NA
80	14	80	University of Bristol (UK)			2010			4177	4177				no bias	University of Bristol, Bristol	Bristol	UK	UK		2010	612093		Staff travel surveys		36	2	44		Nov 98 and Nov 01 (44% response rate).	1998-11-01	2001-11-01	BA					percentage of staff arriving as a car driver on a typical day	Town centre	2	BA	BA						NA
81	14	81	Vodafone (UK)			2010			5400	5400				>70% male	vodafone	NI	UK	UK				city not clear	staff travel survey + estimates		40					1998-06-01	2001-10-01	BA					percentage of staff arriving as a car driver on a typical day	Town centre	2	BA	BA						NA
82	14	82	AstraZeneca (UK)			2010			4200	4200				no bias	astrazeneca	NI	UK	UK				city not clear	staff travel survey		48	2				1997-10-01	2001-10-01	BA					percentage of staff arriving as a car driver on a typical day	Rural	2	BA	BA						NA
83	14	83	Nottingham City Hospital NHS Trust (UK)			2010			3500	3500				>70% female	Nottingham City Hospital	Nottingham	UK	UK		2010	725747		Staff travel surveys		36	2				1997-11-01	2000-11-01	BA					Cars per 100 staff directly inferred from the number of car drivers	Edge of town	2	BA	BA						NA
84	14	84	Wycombe District Council (UK)			2010			502	502				no bias	Wycombe District Council, High Wycombe	High Wycombe	UK	UK		2021	133204		staff travel surveys		12	2				1998-03-01	1999-03-01	BA					Cars per 100 staff directly inferred from the number of car drivers	Town centre	2	BA	BA						NA
85	14	85	BP (UK)			2010			2100	2100				no bias	BP	NI	UK	UK				city not clear	Staff travel surveys		37	3	41		Feb 1998 (60% response), Oct 1999 (42% response), Mar 2001 (41% response)	1998-02-01	2001-03-01	BA					Cars per 100 staff directly inferred from the number of car drivers	Outer suburbs	2	BA	BA						NA
86	14	86	Addenbrooke’s NHS Trust			2010			4977	4977				>70% female	Addenbrooke’s	Cambridge	UK	UK				city not found	Annual travel surveys		72	Annual			every October 1993-99	1993-10-01	1999-10-01	BA					percentage of staff arriving as a car driver on a typical day	Edge of town	2	BA	BA						NA
87	14	87	Buckinghamshire County Council (UK)			2010			2200	2200				no bias	Buckinghamshire County Council	Buckinghamshire	UK	UK				city not found	Repeated staff travel surveys		29	2	29		Sep 1998 and Feb 2001 (29% response).	1998-09-01	2001-02-01	BA					Cars per 100 staff directly inferred from the number of car drivers.	Town centre	2	BA	BA						NA
88	14	88	Orange (Almondsbury Park) (UK)			2010			2000	2000				no bias	Orange (Almondsbury Park)	Gloucestershire	UK	UK				city not found	travel survey + snapshot surveys		63	quarterly			original travel survey: July 96. Since 1999, snapshot surveys undertaken quarterly in Jan, Apr, Jul and Oct.	1996-07-01	2001-10-01	BA					percentage of staff arriving as a car driver on a typical day	Edge of town	2	BA	BA						NA
89	14	89	Computer Associates (UK)			2010			850	850				>70% male	Computer Associates	NI	UK	UK				city not clear	staff travel survey		16	1			survey in Jun 2000 + estimated data for after	2000-06-01	2001-10-01	BA					Cars per 100 staff calculated as the number of single occupancy vehicles. bus patronage figures	Edge of town	2	BA	BA						NA
90	14	90	Marks and Spencer Financial Services (UK)			2010			1100	1100				>70% female	Marks and Spencer Financial Services (UK)	NI	UK	UK				city not clear	Staff travel surveys		14	2				1998-10-01	1999-12-01	BA					Cars per 100 staff directly inferred from the number of car drivers	Edge of town	2	BA	BA						NA
91	14	91	Plymouth Hospitals NHS Trust (UK)			2010			4193	4193				>70% female	Plymouth Hospitals	Plymouth	UK	UK		2016	264200	data for Plymouth (city)	staff travel survey + estimates		72					1995	2001-10-01	BA					percentage of staff arriving as a car driver on a typical day	Outer suburbs	2	BA	BA						NA
92	14	92	HM Prison (UK)			2004			650	650					HM Prison	NI	UK	UK	650			target population based on employees								1999	2001	BA based on survey years; no other information available							3	BA	BA						NA
93	14	93	Buckinghamshire (2)			2004			850	850					Buckinghamshire	Buckinghamshire	UK	UK				city not found								2000	2003	BA							2	BA	BA						NA
94	14	94	Bluewater			2010			5500	5500				>70% female	Bluewater	NI	UK	UK				city not found	Staff travel survey		14	1				1999-03-01	2000-05-01	BA					Change in cars per 100 staff is based on the benchmark expectation about the number of cars that would park on site, and the actual levels of parking in May 2000	Rural	2	BA	BA						NA
95	14	95	Royal Orthopaedic Hospital (UK)			2004			500	500					Birmingham	Birmingham	UK	UK	500	2004	2333259	target population based on employees								2000	2002	BA based on survey years; no other information available							3	BA	BA						NA
96	14	96	Compass Group (UK)			2004			400	400					Birmingham	Birmingham	UK	UK	520			target population based on employees								1999	2003	BA based on survey years; no other information available							3	BA	BA						NA
97	14	97	Local Government Ombudsman (UK)			2004			85	85					City ofYork	York	UK	UK	85			target population based on employees								1998	2002	BA based on survey years; no other information available							3	BA	BA						NA
98	14	98	Generics (UK)			2004			220	220					Generics, UK	NI	UK	UK	220			target population based on employees								2000	2002	BA based on survey years; no other information available							3	BA	BA						NA
99	14	99	St Helen’s College (UK)			2004			800	800					St Helen’s College	St Helens	UK	UK	800	2001	176800	target population based on employees								1999	2002	BA based on survey years; no other information available							3	BA	BA						NA
100	14	100	Northﬁeld Medical Centre (UK)			2004			50	50					Birmingham	Birmingham	UK	UK	50			target population based on employees								1999	2001	BA based on survey years; no other information available							3	BA	BA						NA
101	14	101	The Priory Hospital (UK)			2004			300	300					Birmingham	Birmingham	UK	UK	300			target population based on employees								1998	2001	BA based on survey years; no other information available							3	BA	BA						NA
102	14	102	Buckinghamshire (UK)			2004			410	410					Buckinghamshire	Buckinghamshire	UK	UK	410			target population based on employees								1998	2003	BA based on survey years; no other information available							3	BA	BA						NA
103	14	103	Chamber of Commerce (UK)			2004			18	18					Cambridgeshire	Cambridgeshire	UK	UK	18			target population based on employees								2001	2002	BA based on survey years; no other information available							3	BA	BA						NA
104	14	104	Orange (Temple Point)			2010			400	400				no bias	Orange (Temple Point)	NI	UK	UK				target population based on employees	previous location data + snapshot surveys		0					2001-10-01	2001-10-01	BA					The number of cars per 100 staff is directly inferred from the number of car drivers.	Town centre	2	BA	BA						NA
105	14	105	Cambridgeshire County Council (UK)			2004			1100	1100					Cambridgeshire County	Cambridgeshire	UK	UK		2001	554700	target population based on employees								1999	2002	BA							2	BA	BA						NA
106	14	106	Gov. Ofﬁce for East of England (UK)			2004			290	290					Cambridgeshire	Cambridgeshire	UK	UK	290	2011	4723600	target population based on employees								2001	2002	BA based on survey years; no other information available							3	BA	BA						NA
107	14	107	ARUP (UK)			2004			109	109					Bristol	Bristol	UK	UK	109			target population based on employees																	3	unclear	unclear						NA
108	14	108	City council Transport. Department (UK)			2004			562	562							UK	UK	562			target population based on employees								1997	2001	BA based on survey years; no other information available							3	BA	BA						NA
109	14	109	University of Bristol (UK)			2004			5000	5000					Bristol	Bristol	UK	UK	5000	2004	571462	target population based on employees																	3	unclear	unclear						NA
110	14	110	Cambridge City Council (UK)			2004			800	800					Cambridge	Cambridge	UK	UK	800	2021	129000	target population based on employees								2000	2002	BA based on survey years; no other information available							3	BA	BA						NA
111	14	111	WS Atkins (UK)			2004			783	783					Birmingham	Birmingham	UK	UK	783			target population based on employees								2001	2003	BA based on survey years; no other information available							3	BA	BA						NA
112	14	112	Economic Develop. Depart. City (UK)			2004			423	423					Birmingham	Birmingham	UK	UK	423			target population based on employees								1999	2003	BA based on survey years; no other information available							3	BA	BA						NA
113	14	113	The Dental Hospital (UK)			2004			400	400					Birmingham	Birmingham	UK	UK	400			target population based on employees								1998	2001	BA based on survey years; no other information available							3	BA	BA						NA
114	14	114	Cambridge University (UK)			2004			6250	6250					Cambridge	Cambridge	UK	UK	6250	2021	129000	target population based on employees								2000	2002	BA based on survey years; no other information available							3	BA	BA						NA
115	14	115	Orange (UK)			2004			700	700					Orange	NI	UK	UK				city not found										BA							2	BA	BA						NA
116	14	116	Norwich Union (UK)			2004			1300	1300					Bristol	Bristol	UK	UK	1300			target population based on employees										unclear							3	unclear	unclear						NA
117	14	117	Lancashire—primary schools (UK)			2005			2911	2911					Lancashire (county)	Lancashire	UK	UK		2001	1136500	data for Lancashire County https://www.citypopulation.de/en/uk/admin/								1999	2004	unclear							3	unclear	unclear						NI	NI	NI
118	14	118	Redcar and Cleveland—primary schools (UK)			2005			2173	2173					Redcar and Cleveland (unitary district)	Redcar and Cleveland	UK	UK		2001	139200	https://www.citypopulation.de/en/uk/admin/								2001	2004	unclear							3	unclear	unclear						NI	NI	NI
119	14	119	Thurrock—primary schools (UK)			2005			4331	4331					Thurrock (Unitary district)	Thurrock	UK	UK		2001	143300	https://www.citypopulation.de/en/uk/admin/								2001	2005	unclear							3	unclear	unclear						NI	NI	NI
120	14	120	Wrexham secondary (UK)			2003			2463	2463					North Wales	North Wales	UK	UK		2021	65692										2003								3	unclear	unclear						NI	NI	NI
121	14	121	Bedfordshire—lower school (UK)			2005			3640	3640					Bedfordshire	Bedfordshire	UK	UK		2021		Bedford 106940 Luton 258018 Leighton Buzzard 37469 Dunstable 51973 Biggleswade not found Flitwick not found Kempston not found								2003	2004								3	unclear	unclear						NI	NI	NI
122	14	122	Bedfordshire—middle school (UK)			2005			1669	1669					Bedfordshire	Bedfordshire	UK	UK		2021		Bedford 106940 Luton 258018 Leighton Buzzard 37469 Dunstable 51973 Biggleswade not found Flitwick not found Kempston not found								2003	2004								3	unclear	unclear						NI	NI	NI
123	14	123	Marlow CE Infant (UK)			2004			186	186							UK	UK				city not clear								2000	2003								3	unclear	unclear						NA
124	14	124	Runnymede Secondary (UK)			2003			1349	1349					Surrey	Surrey	UK	UK				city not clear									2003								3	unclear	unclear						NI	NI	NI
125	14	125	Bracknell Forest—primary school (UK)			2005			904	904					Bracknell Forest	Bracknell Forest	UK	UK				city not clear		Self selection						2003	2004								3	unclear	unclear						NI	NI	NI
126	14	126	Leeds—primary schools (UK)			2005			2317	2317					Leeds	Leeds	UK	UK		2014	780000									2001	2004								3	unclear	unclear						NI	NI	NI
127	14	127	Shropshire—secondary schools (UK)			2005			2692	2692					Shropshire (Unitary district)	Shropshire	UK	UK		2001	283300	https://www.citypopulation.de/en/uk/admin/								2002	2004								3	unclear	unclear						NI	NI	NI
128	14	128	Telford & Wrekin—primary school (UK)			2005			1854	1854					Telford & Wrekin (Unitary district)	Telford & Wrekin	UK	UK		2001	158600	https://www.citypopulation.de/en/uk/admin/								2000	2004								3	unclear	unclear						NI	NI	NI
129	14	129	Hartlepool—primary school—March (UK)			2005			813	813					Hartlepool	Hartlepool	UK	UK		2021	88855	data for Hartlepool								2003	2004								3	unclear	unclear						NI	NI	NI
130	14	130	Lancashire—urban secondary schools (UK)			2005			1734	1734					Lancashire (county)	Lancashire	UK	UK		2001	1136500	data for Lancashire County https://www.citypopulation.de/en/uk/admin/								1999	2004								3	unclear	unclear						NI	NI	NI
131	14	131	Wrexham Post 16 (UK)			2003			70	70					Wrexham Post 16, Wrexham	Wrexham	UK	UK		2021	65692										2003								3	unclear	unclear						NI	NI	NI
132	14	132	Stockport—primary schools (UK)			2005			991	991					Stockport (Metropolitan borough, Greater Manchester)	Manchester	UK	UK		2001	284600	https://www.citypopulation.de/en/uk/admin/								2002	2004								3	unclear	unclear						NI	NI	NI
133	14	133	Shropshire—primary schools (UK)			2005			2299	2299					Shropshire (Unitary district)	Shropshire	UK	UK		2001	283300	https://www.citypopulation.de/en/uk/admin/								2002	2004								3	unclear	unclear						NI	NI	NI
134	14	134	Hebden bridge primary (UK)			2003			146	146					Hebden bridge primary	Yorkshire	UK	UK		2001	4086	https://www.citypopulation.de/en/uk/yorkshireandthehumber/west_yorkshire/E34003956__hebden_bridge/									2003								3	unclear	unclear						NI	NI	NI
135	14	135	Redcar & Cleveland—secondary (UK)			2005			1284	1284					Redcar & Cleveland (unitary district)	Redcar & Cleveland	UK	UK		2001	139200	https://www.citypopulation.de/en/uk/admin/								2001	2004								3	unclear	unclear						NI	NI	NI
136	14	136	Wrexham primary (UK)			2003			47	47					Wrexham primary, Wrexham	Wrexham	UK	UK		2021	65692										2003								3	unclear	unclear						NI	NI	NI
137	14	137	Little Kingshill Combined (UK)			2004			262	262					Little Kingshill Combined	Great Missenden	UK	UK		2001		city not found (village belongs to) Buckinghamshire County 479100 https://www.citypopulation.de/en/uk/admin/								2001	2003								3	unclear	unclear
138	14	138	West Wycombe Combined (UK)			2004			209	209					West Wycombe Combined, High Wycombe	High Wycombe	UK	UK		2021	133204									2001	2003								3	unclear	unclear
139	14	139	Holy Trinity CE (UK)			2004			266	266					Holy Trinity CE	Hertfordshire	UK	UK				city not clear								2000	2003								3	unclear	unclear
140	14	140	John Hampden Infant (UK)			2004			275	275					John Hampden Infant	Wendover	UK	UK				city not clear								2000	2003								3	unclear	unclear
141	14	141	Holmer Green Infant (UK)			2004			180	180					Holmer Green Infant	High Wycombe	UK	UK		2001	4077	https://www.citypopulation.de/en/uk/southeastengland/wards/buckinghamshire/E05002645__holmer_green/								2000	2003								3	unclear	unclear
142	142	142	21 primary schools in boroughs of Camden and Islington			2003			1629	Intervention group n= 714 Control group n= 672			year 2 & 5 primary schoolchildren	Female: Intervention (56%) control (49%)	London (boroughs of Camden and Islington)	London	UK	UK		2003	7411269										14 months	Cluster RCT	Analysis adjusted for baseline travel			nine of 11 intervention schools and none of 10 control schools. 2 of 11 intervention schools opted out of the project following randomisation.			1	RCT	RCT		Yes				Yes	Yes
143	143	143	public primary schools (n=61) located in the inner west of Sydney			2008			2258	Intervention group: 12 schools, 1094 baseline responses Control group: 12 schools, 1164 baseline responses			aged 10–12 years	52% female	Sydney	Sydney	Australia	Australia		2008	4032807		survey								19 months	Cluster RCT	survey (students) over five days + survey (parents) on how their child travelled to and from school in a usual week					Urban primary schools	1	RCT	RCT		Yes				No	Yes	Low
144	144	144	Two primary schools in Scotland			2007			60	Intervention group: 1 school class, 31 children Control group: 1 school class, 29 children			9 years (range 9–10 years)	40% boys	West Dunbartonshire, Scotland	West Dunbartonshire	UK	UK		2011	90610	https://www.citypopulation.de/en/uk/admin/	computerised mapping programme, online computerised questionnaire								10 weeks	CBA	computerised mapping programme, online computerised questionnaire						1	CBA	CBA		Yes				No	Yes
145	145	145	walking school bus (WSB) program on student transport in a low-income, urban neighborhood (Three public elementary schools)			2009			820	Intervention group: 1 school, 347 children. Control group: 2 schools, 473 (293+180) children			aged 5–11 years	female 44% (intervention school), 43% and 52% (control schools)	Seattle, Washington	Seattle	US	US		2010		City 610630 Metro 3449240	classroom survey. cross-sectional surveys								1 month, 6 months and 12 months	CBA	classroom survey. cross-sectional surveys					Socioeconomically disadvantaged schools	1	CBA	CBA		Yes				Yes	Yes
146	15	146	Bracknell Forest			2013			3871	Intervention group:3 schools, 828 baseline responses, Control group: 15 schools, 3043 baseline responses			Primary schoolchildren	NR	Bracknell Forest	Bracknell Forest	UK	UK		2021		Bracknell (only -without Forest- found) 76103		Self selection			57				Minimumof 6 months, max of 9 months post-intervention	CBA	57% schools provided baseline and follow-up data						3	CBA	CBA		Yes				Unclear	No
147	15	147	Lancashire			2013			47426	Intervention group: 20 schools, 4714 baseline responses Control group: 217 schools, 42712 baseline responses			Primary and secondary schoolchildren	NR	Lancashire (county)	Lancashire	UK	UK		2011	1171558	https://www.citypopulation.de/en/uk/admin/		Self selection			38				Minimum of 2 months, max of 3 years and 3 months post intervention	BA	38% schools provided baseline and follow-up data						3	BA	BA						No	No
148	15	148	Redcar & Cleveland			2013			10639	Intervention groups: 10 primary schools, 2341 baseline responses; 1 secondary school, 1265 baseline responses Control groups: 34 primary schools, 8298 baseline responses; 2 secondary schools, 1571 baseline responses			Primary and secondary schoolchildren	NR	Redcar and Cleveland (unitary district)	Redcar and Cleveland	UK	UK		2011	135164	https://www.citypopulation.de/en/uk/admin/		Self selection			77				0-2 years post-intervention	BA	77% schools provided baseline and follow-up data.						3	BA	BA						No	No
149	15	149	Telford & Wrekin			2013			6360	Intervention group: 8 schools, 1712 baseline responses; Control group: 21 schools, 4648 baseline responses			Primary schoolchildren	NR	Telford & Wrekin (Unitary district)	Telford & Wrekin	UK	UK		2011	166831	https://www.citypopulation.de/en/uk/admin/		Self selection			33				from 2 months to 3 years and 5 months post-intervention	BA	33% schools provided baseline and follow-up data						3	BA	BA						No	No
150	15	150	TAPESTRY 2003 Dublin--(Porter, 2003)			2003			268	Intervention group: 4 schools, 230 baseline responses; Control group: 2 schools, 38 baseline responses			11-12 years.	NR	Dublin	Dublin	UK	UK		2003	1016577			Convenience sample			NA				1 month	BA	NA					Urban and rural primary schools	3	BA	BA						No	No
151	15	151	TAPESTRY 2003 Herts--(Rumble, 2003)			2003			2293	Intervention group: 11 schools, 1846 baseline responses Control group: 2 schools, 347 baseline responses			primary schoolchildren	NR	Herts (abb. Hertfordshire county)	Hertfordshire	UK	UK		2001	1033977	dsta for Hertfordshire County https://www.citypopulation.de/en/uk/eastofengland/E10000015__hertfordshire/		Localities chosen on likelihood of success, schools self selected			60				3 weeks	BA						Urban primary schools in North Hertfordshire	3	BA	BA						Unclear	No
152	152	152	Walk in to Work Out			2002			295	295. intervention group =145, control group =150			38 years (range 19-69)	64% women	Glasgow, Scotland	Glasgow	UK	UK	Three city workplaces	2002	1584011		questionnaire, focus groups	Automatic randomisation,Allocation concealed			89				6 and 12 months	RCT	questionnaire, focus groups					76% were social economic class 1 or 2. 70% travelled between 2 and 10 miles to work	1	RCT	RCT	Yes	Yes				Unclear	No
153	15	153	Sargeant et al., 2004--Addenbrooke			2004			330	Intervention group n=158 Control group n=172			working age adults	NR	Addenbrooke	Addenbrooke	UK	UK				city not found		Allocation methods not reported. Included a component of non-random allocation. No allocation concealment.			95				3 months	RCT						Urban workplace	3	RCT	RCT	Yes	Yes				No	Yes	Low
154	15	154	Sargeant et al., 2004--Council CarPark			2004			281	Intervention group n=145 Control group n=136			working age adults	NR	Council CarPark	NI	UK	UK				city not clear		Alternate allocation from alphabetical list of names. No allocation concealment or blinding			70				3 months	RCT						Urban workplace	3	RCT	RCT	Yes	Yes				No	Yes	Low
155	15	155	Sargeant et al., 2004--Council New Recruit			2004			103	Intervention group n=55 Control group n=47			working age adults	NR	Council New Recruit	NI	UK	UK				city not clear		Allocation methods not reported			95				3 months	RCT						Urban workplace	3	RCT	RCT	Yes	Yes				No	Yes	Low
156	156	156	Denver Experiment			1982			748	Intervention group: 594 employees from an unknown number of workplaces Control group: 154 employees from an unknown number of workplaces			working age.	NR	Denver	Denver	US	US		1980	492686											BA						Urban workplaces	1	BA	BA
157	157	157	Florida State University carpooling experiment			1982			998	Intervention groups: number of participants not reported. Number of available parking spaces in intervention parking lots were: lot A n=130, lot B n=580, lot C n=186 Control group: number of participants not reported.Number of available parking spaces in control parking lot (lot D) was n=102			NR	NR	Florida	Florida	US	US		1980	9700000						1				30 days	controlled experiment							1	Experiment	Experiment	No	Yes	selected control	Yes		No	No	Unclear
158	158	158	ecotravel coordinator program			2005			59	Intervention (n = 60). Control (n = 60). Intervention groups: Coordinators n=15. Participants n=44. Control group n= 92.			third and fourth-year tertiary students	NR	Kanazawa University, Ishikawa National College of Technology	Kawanishi- Inagawa area	Japan	Asia		2005	454699	data for Kanazawa	survey + ecotravel meeting				NR				2 months	BA	survey + ecotravel meeting	non-randomized control			travel diaries for a week, travel mileage measured by odometers in their cars,		1	BA	BA	volunatry participation	Yes	comparison control	Yes		No	No	Yes
159	159	159	Stockholm obesity intervention			2009			120	120			48.2 (7.4)	0 / 120	Stockholm	Stockholm	Sweden	EU		2009	1335197		Self-report, intention-to-treat analysis				Medium to high	high				RCT	Self-report, intention-to-treat analysis					intention-to-treat analysis	1	RCT	RCT	YES	Yes		YES	YES	YES		Yes
160	160	160	Pedometer-Based Intervention			2009			110	110			63.75	83 / 27	Illawarra and Shoalhaven areas of New South Wales	Illawarra, Shoalhaven	Australia	Australia		2021 2011	305050	data for Illawarra (region) https://www.rdaillawarra.com.au/our-region/#:~:text=The%20Illawarra%20has%20a%20population,and%20south%20coast%20of%20NSW. Shoalhaven (city) 96203 https://www.citypopulation.de/en/australia/admin/	self-reported, pedometer				Medium to high	high				RCT	self-reported, pedometer						1	RCT	RCT	YES	Yes		YES	YES	YES
163	163	163	Walk in to Work Out			2002			295	295			38	109 / 186	Glasgow, Scotland	Glasgow	UK	UK		2002	1584011		Self-report				Medium to high	-				RCT	Self-report							RCT	RCT	YES	Yes		YES	YES	YES
166	12	166	Prestwich (Plan)			2013			255	255					Prestwich	Prestwich	UK	UK		2021	32125		Self-report				Medium to high	high				RCT	Self-report						3	RCT	RCT	YES	Yes		YES	NI	YES
167	12	167	Prestwich (Goal)			2013			149	149			23.44	54 / 95	Prestwich	Prestwich	UK	UK		2021	32125		Self-report				Medium to high	high				RCT	Self-report						3	RCT	RCT	YES	Yes		YES	NI	YES
168	12	168	Baker			2013			79	79			49.2	16 / 63	Baker	Baker						city not clear	Pedometer				Medium to high	high				RCT	Pedometer						3	RCT	RCT	YES	Yes		YES	NI	YES
169	12	169	Gilson (Routes)			2013			70	70			42.2		Gilson	Gilson						city not clear	Pedometer				Medium to high	high				RCT	Pedometer						3	RCT	RCT	YES	Yes		YES	NI	YES
170	12	170	Gilson (Tasks))			2013			70	70					Gilson	Gilson						city not clear	Pedometer				Medium to high	high				RCT	Pedometer						3	RCT	RCT	YES	Yes		YES	NI	YES
173	173	173	Pedometer trial			2007			369	369			49.1 (30–65 years)	284 / 170	urban or rural regions of New South Wales (NSW)	New South Wales (NSW)	Australia	Australia		2021	7400000	data for New South Wales (NSW) (state)	Self-report				-	high				RCT	Self-report						1	RCT	RCT	YES	Yes		YES	NI	YES
175	175	175	telephone counseling intervention			2003			197	197			44.4	0 / 197	different regions	NI	US	US				city not clear	Self-report questionnaires				-	high				RCT	Self-report questionnaires						1	RCT	RCT	YES	Yes		YES	NI	YES
176	176	176	telephone to walk			1997			85	85			66.9	0 / 85	Perth	Perth	Australia	Australia		1997	1358986		Self-report				-	high				RCT	Self-report						1	RCT	RCT	YES	Yes		YES	NI	YES
177	177	177	pedometers to increase physical activity: a pilot study			2009			30	30			43	0 / 30	Perth	Perth	Australia	Australia		2009	1673049		Pedometer				-	high				RCT	Pedometer	randomized control	blocked randomization method				1	RCT	RCT	YES	Yes		YES	NI	YES
185	185	185	Brownson (2005)			2005			1531	1531			45-64	360 / 1171			US	US					Self-report				-	-				Quasi-experimental	Self-report					adults aged > 18 years.	1	Quasi-experiment	Quasi-experiment	NI			YES	YES	YES
186	186	186	Community-Based trial			2004			1232	1232			45-64	303 / 929	Missouri “Bootheel” region (it is composed of the counties of Dunklin, New Madrid, and Pemiscot)	Missouri	US	US		2000		Dunklin 33155 New Madrid 19760 Pemiscot 20047 https://www.citypopulation.de/en/usa/admin/	Self-report. Six intervention communities, six control communities				-	-				Quasi-experimental	Self-report. six intervention communities, six control communities						1	Quasi-experiment	Quasi-experiment	NI			YES	YES	YES
187	187	187	Car-share			2003			298	298			30-39		San Francisco	San Francisco	US	US		2000 2010		City 776733 Metro 4343630	Self-report, statistical control group				-	-				Controlled repeat cross-sectional	Self-report, statistical control group						1	CCS	CCS	NI	Yes	statistical control group	YES	NI	-
188	188	188	Travelsmart suburbs Brisbane			2002			NR	N/R					Brisbane	Brisbane	Australia	Australia		2002	1663375		before-aftrer self-report surveys,				Medium to high	high				Controlled repeat cross-sectional	before-aftrer self-report surveys,						1	CCS	CCS	NI	Yes	before-aftrer self-report surveys,	YES	YES	YES
189	12	189	Socialdata (Perth)			2013			2578	2578			N/R	N/R	Perth	Perth	Australia	Australia		2013	1832610		Self-report				Medium to high	high				Controlled repeat cross-sectional	Self-report						3	CCS	CCS	NI	Yes		YES	YES	YES
190	12	190	Socialdata (Melville)			2013			3090	3090			N/R	N/R	Melville	Melville	Australia	Australia		2011	102135	https://www.citypopulation.de/en/australia/admin/	Self-report				-	high				Controlled repeat cross-sectional	Self-report						3	CCS	CCS	NI	Yes		YES	YES	YES
191	12	191	Sustrans (Lancashire)			2013			2262	2262			N/R	N/R	Lancashire (county)	Lancashire	UK	UK		2011	1171558	https://www.citypopulation.de/en/uk/admin/	Self-report				Medium to high	high				Controlled repeat cross-sectional	Self-report						3	CCS	CCS	NI	Yes		YES	YES	NI
192	12	192	Sustrans (Nottingham)			2013			2057	2057			N/R	N/R	Nottingham	Nottingham	UK	UK		2013	743635		Self-report				Medium to high	high				Controlled repeat cross-sectional	Self-report						3	CCS	CCS	NI	Yes		YES	YES	NI
193	12	193	Sustrans (Sheffield)			2013			1517	1517			N/R	N/R	Sheffield	Sheffield	UK	UK		2013	695996		Self-report				Medium to high	high				Controlled repeat cross-sectional	Self-report						3	CCS	CCS	NI	Yes		YES	YES	NI
194	12	194	Sustrans (Gloucester)			2013			1367	1367			N/R	N/R	Gloucester	Gloucester	UK	UK		2016	128500		Self-report				Medium to high	high				Controlled repeat cross-sectional	Self-report						3	CCS	CCS	NI	Yes		YES	YES	NI
195	12	195	Sustrans (Bristol)			2013			1360	1360			N/R	N/R	Bristol	Bristol	UK	UK		2013	633511		Self-report				Medium to high	high				Controlled repeat cross-sectional	Self-report						3	CCS	CCS	NI	Yes		YES	YES	NI
196	12	196	Sustrans (Cramlington)			2013			1061	1061			N/R	N/R	Cramlington	Cramlington	UK	UK		2021	33180		Self-report				Medium to high	high				Controlled repeat cross-sectional	Self-report						3	CCS	CCS	NI	Yes		YES	YES	NI
197	12	197	Sustrans (Doncaster)			2013			977	977			N/R	N/R	Doncaster	Doncaster	UK	UK		2021	158141		Self-report				Medium to high	high				Controlled repeat cross-sectional	Self-report						3	CCS	CCS	NI	Yes		YES	YES	NI
198	12	198	Wilmink			1987			2000	2000					Delft	Delft	Netherlands	EU		2021	95060		Self-report				Medium to high	-				Controlled repeat cross-sectional	Self-report						3	CCS	CCS	NI	Yes		YES	YES	YES
199	12	199	TAPESTRY			2013			1299	1299													Self-report				Medium to high	-				Controlled repeat cross-sectional	Self-report						3	CCS	CCS	NI	Yes		YES	YES	NI
200	12	200	Haq			2004			242	242. 167 individuals = intervention group, 60 = control					York	York	UK	UK		2001	181131		Self-report				-	-				Controlled repeat cross-sectional	Self-report						3	CCS	CCS	NI	Yes		YES	NI	NI
203	12	203	City and County of San Francisco,	1		2013									San Francisco	San Francisco	US	US		2013		City 839572 Metro 4519640																new developments	4								NI
204	12	204	City and County of San Francisco,	1		2013									San Francisco	San Francisco	US	US		2013		City 839572 Metro 4519640																new developments	4								NI
206	206	206	De Gruyter, C. (2017)	1		2017																																new developments	1
209	209	209	Enoch & Potter, 2003;	1		2003			NR																													new developments	1
210	210	210	Ho et al., 2017;	1		2017			NR	650 Walking. 884 Cycling. 686 Green car use					Rouse Hill Town Centre, New South Wales	New South Wales	Australia	Australia		2016	7965		resident survey. telephone and online surveys															new developments	1
211	16	211	Jollon, 2013;	1		2013																																new developments	4								NA
212	16	212	MAX, 2007;	1		2007			NR								Ireland Germany Lithuania Netherlands Poland Spain Sweden Switzerland UK	EU																				new developments	4								NA
213	16	213	NSW Government, 2011;	1		2011																																new developments	4								NA
214	16	214	Potter & Enoch, 2007;	1		2007			NR																													new developments	1
218	218	218	Pasadena Towers Case Study			1994			371	192 (control site), 179 (intervention site)					Pasadena, California	Pasadena	US	US		1990	131591											intervention vs non-randomized control		non-randomized control				new developments	1	Experiment	Experiment		Yes	non-randomized control
219	16	219	UrbanTrans & Kimley Horn Associates, 2014;	1		2014																																new developments	4								NA
222	16	222	Wiblin et al., 2012	1		2012																																new developments	4								NA
223	18	223	Brighton Year 1				2006		2000	1968; 2000					Brighton	Brighton	UK	UK	West edge of city (average income)	(no yop/yoi) 2021	612159		pre/post surveys	Before doorstep surveys with one-day travel diary	Mar/April 2006 Before Nov 200				1,968 households participated in ‘before’ survey. No information on sampling procedure, contact rate, etc. After doorstep survey with about 2,000 households			Quasi-experiment	two group pre-and post-test surveys; paper-based household surveys	no control	No comparison area		one-day travel diaries		2.5	Quasi-experiment	Quasi-experiment	Unclear	Yes	No comparison area	Yes	Unclear	NA	Unclear	Unclear
224	18	224	Bristol: Bishopsworth 1				2002		321						Bristol: Bishopsworth	Bristol	UK	UK	South-west edge of city (low income)			city not found	pre/post surveys	Partial matched (panel) samples Control group in adjacent area	May 2002 (b) March 2003 (a)		(rr = 70%/69%)		Households with phone details only Target b/a samples = 378/321 Control b/a samples = 484/342 (rr = 72%/67%)	May 2002 (b) March 2003 (a)		Quasi-experiment	two group pre-and post-test surveys	non-randomized control	comparison area	partial matched samples and matched (panel) samples	one-day travel diaries		2.5	Quasi-experiment	Quasi-experiment	Unclear	Yes	non randomized comparison area	Yes	Unclear	No	Unclear	Unclear
225	18	225	Bristol: Bishopsworth 2				2003		363	378; 363					Bristol: Bishopsworth	Bristol	UK	UK				city not found	pre/post surveys	Partial matched (panel) samples Control group in adjacent area	May 2002 May/June 2004		(rr = 70%/76%)		Households with phone details only Target b/a samples = 378/363 Control b/a samples = 484/313 (rr = 72%/70%)	May 2002 May/June 2004		Quasi-experiment	two group pre-and post-test surveys			partial matched samples and matched (panel) samples	one-day travel diaries		2.5	Quasi-experiment	Quasi-experiment		Yes	Control group in adjacent area
226	18	226	Bristol: Hartcliffe				2003		374	374; 332					Bristol: Hartcliffe	Bristol	UK	UK	South edge of city (low income)			city not found	pre/post surveys	Independent samples Control group in adjacent area	March 2003 May/June 2004		(rr = 61%/66%)		Households with phone details only Target b/a samples = 374/332 Control b/a samples = 342/313 (rr = 67%/70%)	March 2003 May/June 2004		Quasi-experiment	two group pre-and post-test surveys			partial matched samples and matched (panel) samples	one-day travel diaries		2.5	Quasi-experiment	Quasi-experiment	Unclear	Yes	Control group in adjacent area	Yes	Unclear	No	Unclear	Unclear
227	18	227	Bristol: Bishopston				2003		456	456; 478					Bristol: Bishopston	Bristol	UK	UK	North (inner-) outer area of city (high income, students)			city not found	pre/post surveys	Partial matched (panel) samples Control group in adjacent area	March/April 2003 Sept/Oct 2003		(rr = 71%/78%)		Households with phone details only Target b/a samples = 456/450 Control b/a samples = 448/415 (rr = 74%/73%)	March/April 2003 Sept/Oct 2003		Quasi-experiment	two group pre-and post-test surveys			partial matched samples and matched (panel) samples	one-day travel diaries		2.5	Quasi-experiment	Quasi-experiment	Unclear	Yes	Control group in adjacent area	Yes	Unclear	No	Unclear	Unclear
228	18	228	Darlington Phase 1				2005		1237	1237; 1156					Darlington	Darlington	UK	UK	North and north-west outer areas of town	2021	92363		pre/post surveys	Matched (panel) samples No control group, Independent samples Town-wide control	Sep–Dec 2004 Nov–Dec 2005		(rr = 90%/68%)		Before survey integrated into PTP contact stage After survey by telephone interview Target b/a samples = 2053/779 Travel behaviour in after survey based on average frequency of walking, cycling and public transport	Sep–Dec 2004 Nov–Dec 2005		Quasi-experiment	two group pre-and post-test surveys			independent (random) samples from the project area and comparison area populations for both the before and after surveys	one-day travel diaries		2.5	Quasi-experiment	Quasi-experiment	Unclear	Yes	comparison area	Yes	Unclear	No	Unclear	Unclear
229	18	229	Lancashire: South Ribble				2006		634	634					Lancashire: South Ribble (county)	Lancashire	UK	UK	Outlying areas to south and east of Preston	2011 (yop/yoi missing)	1171558	https://www.citypopulation.de/en/uk/admin/	pre/post surveys									Quasi-experiment	two group pre-and post-test surveys			independent (random) samples from the project area and comparison area populations for both the before and after surveys	one-day travel diaries		2.5	Quasi-experiment	Quasi-experiment	Unclear	Yes	comparison area	Yes	Unclear	No	Unclear	Unclear
230	18	230	Nottingham Lady Bay				2003		601	601; 450					Nottingham Lady Bay	Nottingham	UK	UK	South (inner-) outer area of city (high income)	2021 (yop/yoi missing)	794008	data for Nottingham	pre/post surveys	Matched (panel) samples, Weighting to match distribution of segments. City-wide control	June–Aug 2003 May–Jun 2004		(rr = 69%/86%)		Households with and without phone details Target b/a samples = 601/450 (rr = 69%/86%) Control b/a samples = 409/485 (rr = 66%/65%)	June–Aug 2003 May–Jun 2004		Quasi-experiment	two group pre-and post-test surveys			partial matched samples and matched (panel) samples	one-day travel diaries		2.5	Quasi-experiment	Quasi-experiment	No	Yes	City-wide control	Yes	Unclear	No	Unclear	Unclear
231	18	231	Nottingham Meadows				2003		535	535; 402					Nottingham Meadows	Nottingham	UK	UK	South inner area of city (low income, ethnic diversity)	2021 (yop/yoi missing)	794008	data for Nottingham	pre/post surveys	Matched (panel) samples City-wide control	June–Aug 2003 May–Jun 2004		(rr = 61%/80%)		Households with and without phone details Target b/a samples = 535/402 (rr = 61%/80%) Control b/a samples = 409/485 (rr = 66%/65%)	June–Aug 2003 May–Jun 2004		Quasi-experiment	two group pre-and post-test surveys			partial matched samples and matched (panel) samples	one-day travel diaries		2.5	Quasi-experiment	Quasi-experiment	No	Yes	City-wide control	Yes	Unclear	No	Unclear	Unclear
232	18	232	Peterborough Phase 1				2005		1073	1073; 1228					Peterborough	Peterborough	UK	UK	North of town	2021 (yop/yoi missing)	163379		pre/post surveys	Independent samples, Weighting to match distribution of segments. Town-wide control	Sep–Nov 2004 Feb–Apr 2006		(rr = 60%/64%)		Households with and without phone details Target b/a samples = 1073/1228 (rr = 60%/64%) Control b/a samples = 3388/666 (rr = 60%/60%)	Sep–Nov 2004 Feb–Apr 2006		Quasi-experiment	two group pre-and post-test surveys			independent (random) samples from the project area and comparison area populations for both the before and after surveys	one-day travel diaries		2.5	Quasi-experiment	Quasi-experiment	No	Yes	Town-wide control	Yes	Unclear	No	Unclear	Unclear
233	18	233	Worchester Phase 1				2005		978	978; 962					Worchester (Worcester found)	Worchester	UK	UK	North-east of town	2015 2021 (yop/yoi missing)		City 101328 Metro 552292	After survey by telephone interview	Independent samples, Weighting to match distribution of segments. Town-wide control	Sep–Nov 2004 Mar–Apr 2006		(rr = 59/88%)		Households with and without phone details Target b/a samples = 978/962 (rr = 59/87%) Control b/a samples = 3147/446 (rr = 59/88%) Travel behaviour in after survey based on average frequency of mode use	Sep–Nov 2004 Mar–Apr 2006		Quasi-experiment	two group pre-and post-test surveys			independent (random) samples from the project area and comparison area populations for both the before and after surveys	average weekly frequency of use of different travel modes		2.5	Quasi-experiment	Quasi-experiment	No	Yes	Town-wide control	Yes	Unclear	No	Unclear	Unclear
234	234	234	Experimental Study Munich			2017			606	606. (treatment = 288) and control group (ncontrol = 318).			32.4	48.8 (male)	Munich	Munich	Germany	EU	new residents	2017	1482117		detailed mobility diaries over three days,				0.35				six weeks after the completion of the PTP campaign	two-group posttest-only randomized experiment					detailed mobility diaries over three days,	new residents	1	post intervention	post intervention	Yes	Yes		No	Yes	Yes	Yes	Medium
235	21	235	Sapporo				1999		66	66					Sapporo	Sapporo	Japan	Asia		1999	2503136		Travel diary survey Travel survey									Before–after design without control group	1. Travel diary survey 2. Feedback on travel behavior 3. Travel survey 4. Feedback on travel behavior change	no control	no				3	BA	BA	Unclear	No		Yes	Unclear	NI	Unclear	Unclear
236	21	236	Sapporo (Ainosato)				2000		120	120					Sapporo (Ainosato)	Sapporo	Japan	Asia		2000	2508246		Travel diary survey Travel survey									Before–after design without control group	1. Travel diary survey 2. Feedback on travel behavior 3. Travel survey 4. Feedback on travel behavior change	no control	no				3	BA	BA	Unclear	No		Yes	Unclear	NI	Unclear	Unclear
237	21	237	Sapporo (Ebetsu)				2000		349	349					Sapporo (Ebetsu)	Sapporo	Japan	Asia		2000	2508246		Travel diary survey Travel survey									Before–after design without control group	1. Travel diary survey 2. Feedback on travel behavior 3. Travel survey 4. Feedback on travel behavior change	no control	no				3	BA	BA	Unclear	No		Yes	Unclear	NI	Unclear	Unclear
238	21	238	Takasaki City				2000		91	91					Takasaki City	Takasaki City	Japan	Asia		2000	358233		Travel diary survey Travel survey									Before–after design with control group	1. Simple travel survey 2. Provide trial ticket 3. Travel survey	control, no specific					3	CBA	CBA	Unclear	Yes		Yes	Unclear	Unclear	Unclear	Unclear
239	21	239	Kanazawa				2001		19	19					Kanazawa	Kanazawa	Japan	Asia		2001	456164		Travel diary survey Travel survey									Before–after design with control group	1. Travel diary survey 2. Feedback on travel behavior 3. Travel survey	control, no specific					3	CBA	CBA	Unclear	Yes		Yes	Unclear	Unclear	Unclear	Unclear
240	21	240	Hitachi City				2002		58	58					Hitachi City	Hitachi City	Japan	Asia		2021	186307		Travel diary survey Travel survey									Before–after design without control group	1. Travel diary survey 2. Feedback on travel behavior 3. Travel survey	no control	no				3	BA	BA	Unclear	No		Yes	Unclear	NI	Unclear	Unclear
241	21	241	Osaka City				2001		106	106					Osaka City	Osaka City	Japan	Asia		2001		City (2021) 2592413 Metro (2001) 18662468										Before–after design with control group		control, no specific					3	CBA	CBA	Unclear	Yes		Yes	Unclear	Unclear	Unclear	Unclear
242	21	242	Suita City				2002		422	422					Suita City	Suita City	Japan	Asia		2021	351630		Simple travel survey Travel survey									Before–after design with control group	1. Simple travel survey 2. Provide customized information 3. Travel survey	control, no specific					3	CBA	CBA	Unclear	Yes		Yes	Unclear	Unclear	Unclear	Unclear
243	21	243	Kawanishi- Inagawa area				2003		312	312					Kawanishi- Inagawa area	Kawanishi- Inagawa area	Japan	Asia		2021	160520	data for Kawanishi (city)	Simple travel survey									Before–after design with control group	1. Simple travel survey 2. Individualized information with behavioral plan	control, no specific					3	CBA	CBA	Unclear	Yes		Yes	Unclear	Unclear	Unclear	Unclear
244	21	244	Sapporo				2003		50	50					Sapporo	Sapporo	Japan	Asia		2003	2562208		Simple travel survey									Before–after design with control group	1. Simple travel survey 2. Individualized information with behavioral plan	control, no specific					3	CBA	CBA	Unclear	Yes		Yes	Unclear	Unclear	Unclear	Unclear
245	21	245	Mihara Town				2003								Mihara Town	Mihara Town	Japan	Asia		2021	80387		Questionnaire										1. Provide information 2. Questionnaire						3	post intervention	post intervention	Unclear				Unclear		Unclear	Unclear
246	21	246	Suzuran-dai (Hyogo- Prefecture)				2004		210	210					Suzuran-dai (Hyogo- Prefecture)	Hyogo	Japan	Asia				city ot clear										Before–after design with control group	1. Area-specific information with behavioral plan	control, no specific					3	CBA	CBA	Unclear	Yes		Yes	Unclear	Unclear	Unclear	Unclear
247	21	247	Miki City				2004		48	48					Miki City	Miki City	Japan	Asia		2021	74701											Before–after design with control group	1. Area-specific information with behavioral plan	control, no specific					3	CBA	CBA	Unclear	Yes		Yes	Unclear	Unclear	Unclear	Unclear
248	21	248	Himeji City				2004		103	103					Himeji City	Himeji City	Japan	Asia		2021	481493		Simple travel survey									Before–after design with control group	1. Simple travel survey 2. Individualized information with behavioral plan	control, no specific					3	CBA	CBA	Unclear	Yes		Yes	Unclear	Unclear	Unclear	Unclear
249	21	249	Keihanshin area				2004		1560	1560					Keihanshin area	Keihanshin area	Japan	Asia				city nor found	Simple travel survey									Before–after design with control group	1. Simple travel survey 2. Feedback on travel behavior with behavioral plan	control, no specific					3	CBA	CBA	Unclear	Yes		Yes	Unclear	Unclear	Unclear	Unclear
250	21	250	Obihiro City				2004		410	410					Obihiro City	Obihiro City	Japan	Asia		2021	173890		Travel survey									experimental group -control group design	1. Request creation of behavioral plan 2. Travel survey	control, no specific					3	Experiment	Experiment	Unclear	Yes		Yes	Unclear	Unclear	Unclear	Unclear
251	21	251	Ryugasaki City				2005		153	153					Ryugasaki City	Ryugasaki City	Japan	Asia		2005	78950	https://www.citypopulation.de/en/japan/admin/	Simple travel survey									Before–after design with control group	1. Simple travel survey 2. Feedback on travel behavior with behavioral plan	control, no specific					3	CBA	CBA	Unclear	Yes		Yes	Unclear	Unclear	Unclear	Unclear
252	21	252	Kanazawa City (several workplaces)				2001		106	106					Kanazawa City	Kanazawa City	Japan	Asia		2001	456164		Travel diary survey Travel survey									Before–after design without control group	1. Travel diary survey 2. Feedback on travel behavior 3. Travel survey 4. Feedback on travel behavior change	no control	no				3	BA	BA	Unclear	No		Yes	Unclear	NI	Unclear	Unclear
253	21	253	Toyonaka City (1 workplace)				2003		79	79					Toyonaka City	Toyonaka City	Japan	Asia		2021	384459		Simple travel survey Travel survey									Before–after design without control group	1. Simple travel survey 2. Individualized information with behavioral plan 3. Travel survey 4. Feedback on travel behavior change	no control	no				3	BA	BA	Unclear	No		Yes	Unclear	NI	Unclear	Unclear
254	21	254	Suita City (1 university)				2003		133	133					Suita City	Suita City	Japan	Asia		2021	351630		Travel diary survey									Before–after design without control group	1. Travel diary survey 2. Individualized information with behavioral plan	no control	no				3	BA	BA	Unclear	No		Yes	Unclear	NI	Unclear	Unclear
255	21	255	Himeji City (3 workplaces)				2004		99	99					Himeji City	Himeji City	Japan	Asia		2021	481493		Simple travel survey									Before–after design with control group (measuring commuting trips)	1. Simple travel survey 2. Individualized information with behavioral plan	control, no specific					3	CBA	CBA	Unclear	Yes		Yes	Unclear	Unclear	Unclear	Unclear
256	21	256	Osaka Prefecture (several workplaces)				2004		500	500					Osaka Prefecture	Osaka Prefecture	Japan	Asia		2004		City (2021) 2592413 Metro (2004) 18737176	Simple travel survey Travel survey									Before–after design with control group	1. Simple travel survey 2. Individualized information with behavioral plan 3. Travel survey 4. Feedback on travel behavior change	control, no specific					3	CBA	CBA	Unclear	Yes		Yes	Unclear	Unclear	Unclear	Unclear
257	21	257	Sapporo				2000		127	127					Sapporo	Sapporo	Japan	Asia		2000	2508246		Class and travel diary survey Class and travel survey									Before–after design without control group	1. Class and travel diary survey 2. Feedback on travel behavior 3. Class and travel survey	no control	no				3	BA	BA	Unclear	No		Yes	Unclear	NI	Unclear	Unclear
258	21	258	Kanazawa				2001		39	39					Kanazawa	Kanazawa	Japan	Asia		2001	456164		Travel diary survey Travel survey									Before–after design with control group	1. Travel diary survey 2. Feedback on travel behavior 3. Travel survey	control, no specific					3	CBA	CBA	Unclear	Yes		Yes	Unclear	Unclear	Unclear	Unclear
259	21	259	Sapporo				2002		292	292					Sapporo	Sapporo	Japan	Asia		2002	2542906		Travel diary survey Travel survey									Before–after design without control group	1. Travel diary survey 2. Feedback on travel behavior 3. Travel survey 4. Feedback on travel behavior change	no control	no				3	BA	BA	Unclear	No		Yes	Unclear	NI	Unclear	Unclear
260	21	260	Sapporo				2002		97	97					Sapporo	Sapporo	Japan	Asia		2002	2542906		Travel diary survey Travel survey									Before–after design without control group	1. Travel diary survey 2. Feedback on travel behavior 3. Travel survey 4. Feedback on travel behavior change	no control	no				3	BA	BA	Unclear	No		Yes	Unclear	NI	Unclear	Unclear
261	21	261	Kanazawa				2002		71	71					Kanazawa	Kanazawa	Japan	Asia		2002	455797		Simple travel survey Travel survey									Before–after design with control group	1. Simple travel survey 2. Individualized advice by coordinator 3. Travel survey	control, no specific					3	CBA	CBA	Unclear	Yes		Yes	Unclear	Unclear	Unclear	Unclear
262	21	262	Izumi City				2002		135	135					Izumi City	Izumi City	Japan	Asia		2021	189085		Travel diary survey Workshop in class									-	1. Travel diary survey 2. Workshop in class						3	unclear	unclear					Unclear
263	21	263	Toyonaka				2003		91	91					Toyonaka	Toyonaka	Japan	Asia		2021	384459		-									-	-						3	unclear	unclear
264	21	264	Fuji				2004		164	164					Fuji	Fuji	Japan	Asia		2021	240014		1. Simple travel survey 2. Workshop in class 3. Travel survey									-	1. Simple travel survey 2. Workshop in class 3. Travel survey						3	unclear	unclear					Unclear
265	21	265	Hadano				2005		81	81					Hadano	Hadano	Japan	Asia		2021	174281		1. Simple travel survey 2. Workshop in class 3. Travel survey									Before–after design without control group	1. Simple travel survey 2. Workshop in class 3. Travel survey	no control	no				3	BA	BA	Unclear	No		Yes	Unclear	NI	Unclear	Unclear
266	19	266	Armadale				2003		562	7000 pop 247 pre 562 post					Armadale	Armadale	Australia	Australia	7000	2021	62296			Partial panel			0.72			Mar-03 (before) Mar-04 (after)		Before-after population comparison		NA					3	BA	BA						NI	NI	NI
267	19	267	Bassendean				2006		409	13,463 pop 409 pre 409 post					Bassendean	Bassendean	Australia	Australia	13463					Random			0.63			Nov-06 (before) Nov-07 (after)		Before-after population comparison		NA					3	BA	BA						NI	NI	NI
268	19	268	Belmont	1						15000 city					Belmont	Belmont	Australia	Australia	15000													Before-after population comparison		NA					3	BA	BA						NI	NI	NI
269	19	269	Cambridge				2001		400	24,000 pop 529 pre 400 post					Cambridge	Cambridge	Australia	Australia	24000					Panel			0.7			Nov-01 (before) Nov-02 (after)		Before-after population comparison		NA					3	BA	BA						NI	NI	NI
270	19	270	Canning				2006		535	14,000 pop 535 pre 571 post					Canning	Canning	Australia	Australia	14000					Random			0.77			Mar-06 (before) Mar-07 (after)		Before-after population comparison		NA					3	BA	BA						NI	NI	NI
271	19	271	Gosnells (Thornlie)	1			2006		17200	17200					Gosnells (Thornlie)	Gosnells	Australia	Australia	17200													Before-after population comparison		NA					3	BA	BA						NI	NI	NI
272	19	272	Claremont				2006		508	8733 pop 661 pre 508 post					Claremont	Claremont	Australia	Australia	8733					Panel			0.62			Jun-06 (before) Jun-07 (after)		Before-after population comparison		NA					3	BA	BA						NI	NI	NI
273	19	273	Cottesloe	1			2006			6300					Cottesloe	Cottesloe	Australia	Australia	6300													Before-after population comparison		NA					3	BA	BA						NI	NI	NI
274	19	274	Nedlands	1			2006			14000					Nedlands	Nedlands	Australia	Australia	14000													Before-after population comparison		NA					3	BA	BA						NI	NI	NI
275	19	275	Fremantle				2001		615	17,000 pop 476 pre 615 post					Fremantle	Fremantle	Australia	Australia	17000					Random			0.8			Mar-01 (before) Mar-04 (after)		Before-after population comparison		NA					3	BA	BA						NI	NI	NI
276	19	276	Joondalup				2007		373	19,475 pop 382 pre 373 post					Joondalup	Joondalup	Australia	Australia	19475					Random			0.82			Mar-07 (before) Mar-08 (after)		Before-after population comparison		NA					3	BA	BA						NI	NI	NI
277	19	277	Joondalup (Living Smart)				2007		425	5000 pop 579 pre 425 post					Joondalup	Joondalup	Australia	Australia	5000					Random			0.79			Nov-07 (before) Nov-09 (after)		Before-after population comparison		NA					3	BA	BA						NI	NI	NI
278	19	278	Mandurah (Living Smart)				2008		490	10,000 pop 553 pre 490 post					Mandurah	Mandurah	Australia	Australia	10000					Random			0.76			Feb-08 (before) Feb-10 (after)		Before-after population comparison		NA					3	BA	BA						NI	NI	NI
279	19	279	Melville (East)				2007		544	38,500 pop 576 pre 544 post					Melville	Melville	Australia	Australia	38500					Random			0.83			May-07 (before) May-08 (after)		Before-after population comparison		NA					3	BA	BA						NI	NI	NI
280	19	280	Melville (West)				2000		634	19,000 pop 972 pre 634 post					Melville	Melville	Australia	Australia	19000					Random			0.78			May-00 (before) Nov-03 (after)		Before-after population comparison		NA					3	BA	BA						NI	NI	NI
281	19	281	Perth City				2006		574	670 pre 574 post					Perth City	Perth	Australia	Australia	4000	2006	1533535			Random			0.72			Nov-06 (before) Nov-07 (after)		before-after population comparison		NA					3	BA	BA						NI	NI	NI
282	19	282	Stirling				2006		574	670 pre 574 post					Stirling	Stirling	Australia	Australia	26756	2006	183957	https://www.citypopulation.de/en/australia/admin/										Before-after population comparison		NA					3	BA	BA						NI	NI	NI
283	19	283	Vincent				2006		574	670 pre 574 post					Vincent	Vincent	Australia	Australia	8800													Before-after population comparison		NA					3	BA	BA						NI	NI	NI
284	19	284	Rockingham				2007		420	14,000 pop 562 pre 420 post					Rockingham	Rockingham	Australia	Australia	14000					Panel			0.75			May-07 (before) May-08 (after)		Before-after population comparison	Panel	NA					3	BA	BA						NI	NI	NI
285	19	285	South Perth				1997		1118	35000					South Perth	South Perth	Australia	Australia	35000	2001	37606	https://www.citypopulation.de/en/australia/admin/	travel diary	Random			0.76			1997–2000 (before) Oct-00 (after)		Before-after population comparison	travel diary evaluations	NA					3	BA	BA						NI	NI	NI
286	19	286	Subiaco				1998		400	15,000 pop 310 pre 400 post					Subiaco	Subiaco	Australia	Australia	15000					Random						Sep-98 (before) Sep-03 (after)		Before-after population comparison	Random	NA					3	BA	BA						NI	NI	NI
287	19	287	Swan				2006		409	11,200 pop 409 pre 409 post					Swan	Swan	Australia	Australia	11200					Random			0.62			Nov-06 (before) Nov-07 (after)		Before-after population comparison	Random	NA					3	BA	BA						NI	NI	NI
288	19	288	Victoria Park				2006		391	25,360 pop 454 pre 391 post					Victoria Park	Victoria Park	Australia	Australia	25360					Random & panel			0.86			Mar-06 (before) Mar-07 (after)		Before-after population comparison	Random & panel	NA					3	BA	BA						NI	NI	NI
289	19	289	Wanneroo (Clarkson)				2005		409	14,000 pop 580 pre 409 post					Wanneroo (Clarkson)	Wanneroo	Australia	Australia	14000					Panel			0.71			May-05 (before) May-06 (after)		Before-after population comparison	Panel	NA					3	BA	BA						NI	NI	NI
290	19	290	Wanneroo (Marangaroo)				2002		201	11,000 pop 300 pre 201 post					Wanneroo (Marangaroo)	Wanneroo	Australia	Australia	11000					Panel			0.67			May-02 (before) May-03 (after)		Before-after population comparison	Panel	NA					3	BA	BA						NI	NI	NI
291	19	291	Adelaide pilot			2001			350	350 households					Adelaide	Adelaide	Australia	Australia		2021	1345445		seven-day travel diaries									pre and post-intervention		NA			seven-day travel diaries		3	CBA	CBA						NI	NI	NI
292	19	292	Adelaide – Christies Beach			2001			1000	1000 households					Adelaide – Christies Beach	Adelaide	Australia	Australia		2020	10755	https://www.citypopulation.de/en/australia/adelaide/403041074__christies_beach/	seven-day travel diaries									pre and post-intervention		NA			seven-day travel diaries		3	BA	BA						NI	NI	NI
293	19	293	Adelaide – Dulwich			2001			1000	1000 households					Adelaide – Dulwich	Adelaide	Australia	Australia		2021		city not found	seven-day travel diaries									pre and post-intervention		NA			seven-day travel diaries		3	BA	BA						NI	NI	NI
294	19	294	Brisbane – Holland Park (Qld)		3	2001			600	600 households					Brisbane – Holland Park (Qld)	Brisbane	Australia	Australia					seven-day travel diaries									pre and post-intervention		NA			seven-day travel diaries		3	BA	BA						NI	NI	NI
295	19	295	Redland				2004		2357	2357; 2831					Redland	Redland	Australia	Australia	10000								0.77			Jun 2004; Nov 2004			Random	Yes					3	CBA	CBA		Yes				NI	NI	NI
296	19	296	Brisbane (North)				2006-8		1309	1309; 1381					Brisbane (North)	Brisbane	Australia	Australia	170200								0.96												3	CBA	CBA						NI	NI	NI
297	19	297	Brisbane (South)	1											Brisbane (South)	Brisbane	Australia	Australia	180000																				3								NI	NI	NI
298	19	298	Gold Coast	1											Gold Coast	NI	Australia	Australia	72000																				3								NI	NI	NI
299	19	299	Sunshine Coast	1											Sunshine Coast	Sunshine Coast	Australia	Australia	72000																				3								NI	NI	NI
300	19	300	South Perth (WA)			1997			865	865					South Perth	Perth	Australia	Australia	35000	2001 (yop/yoi missing)	37606	https://www.citypopulation.de/en/australia/admin/										CBA							3	CBA	CBA						NI	NI	NI
301	19	301	Grange (Qld)				2001		589	987; 589					Grange (Qld)	Grange	Australia	Australia		2016	4318	https://quickstats.censusdata.abs.gov.au/census_services/getproduct/census/2016/quickstat/SSC31236																	3	BA	BA						NI	NI	NI
302	19	302	Townsville (Qld)				2003		580	580; 831					Townsville (Qld)	Townsville	Australia	Australia		2021 (yop/yoi missing)	180474																		3	CBA	CBA						NI	NI	NI
303	303	303	occupational health care units (OHC) intervention			2012			241	241, pedometer (STEP, N= 123), (control= 118), pop = 2,230 employees			44.1 (9.4) (step); 45.3 (9.1) (comparison)	female: 87 (71%) (step); 78 (66%)(comparison)	Southern Finland	Southern Finland	Finland	EU	2230			employees	questionnaires, process evaluation and interviews	Panel			32% to 72%	0.72	Baseline questionnaire and follow-up questionnaires at 2 and 6 months		12	RCT	questionnaires (0, 2, 6, 12 months), process evaluation and interviews (12 months)			stratified randomization with random allocation sequences to ensure closely balanced groups within each worksite	pedometer, questionnaire	20 office-based worksites	1	RCT	RCT	Yes	Yes		Yes	Yes	Medium	Yes	Medium
304	304	304	implementation intentions intervention			2011			352	701, (intervention=208), (Control=207)				44.0 male	Northern England	Northern England	England	UK				city not clear					0.5021	84.82				RCT, DiD	(control vs. experimental), (baseline vs. follow-up)			the response rate between baseline and follow-up was 84.82% and the overall response rate was 50.21%.	single-occupancy car use in last 2 weeks, perceived change in behaviour in past month, 7-point unipolar (+1 to +7) scales,	predominantly rural area	1	RCT	RCT	Yes	Yes		Yes	Yes	High	Unclear	Medium
305	305	305	Residential relocation intervention			2006			241	241. control (n = 123) experimental group (n = 118), 169 both waves					Stuttgart	Stuttgart	Germany	EU		2006	594271		1-day mobility diary	recruited by post, e-mail, and telephone			0.30125		Six months after completing the first questionnaire move, experimental group received the intervention via mail about 6 weeks after the move, 12 weeks after their move		12 weeks after their move	RCT					For each trip, participants registered the time and starting location, purpose (e.g., work, shopping, leisure), travel mode (e.g., car, bike, walking, or PT), destination, time of arrival, and estimated distance. 1-day mobility diary	Participants who planned to move to Stuttgart	1	RCT	RCT	Yes	Yes		Yes	Yes	High	Yes	Medium
306	306	306	self-regulated behavioral change intervention: Stage-based dialog campaign			2013		Stage-based dialog campaign	291	291. Control = 118, Stage-based dialog campaign = 68, Standardized information = 105			36.2 years	72.0% were female	Berlin	Berlin	Germany	EU		2013	3488177		phone interview, standardized interview	random sample of 12,000 addresses			0.485					RCT	regression analyses	randomized control	randomly assigned		a) How frequently have you used the motor car (PT, cycling, walking) for everyday trips within the last month (5-point rating scale, never [0] to very often [4]); (b) How many days have you used the motor car (PT, cycling, walking) within the last week for everyday trips(7-point rating scale from never [0] to every day [7]).		1	RCT	RCT	Yes	Yes		Yes	Yes	High	Yes	High
30802	308	308	rush-hour avoidance intervention: Monetary			2011			232	232			41.3	60.3 Male	Zoetermeer	Zoetermeer	Netherlands	EU		2021	115845		on-board transponder, pre and post measurement surveys, travel log	opt-in random car owners							1 week	quasi-experimental design	collected data, pre and post measurement surveys	randomized control	counterbalanced (blocked randomization)				1	Quasi-experiment	Quasi-experiment	Yes	No		Yes	Yes	NA	Unclear	High
30801	308	308	rush-hour avoidance intervention: Yeti			2011			341	341. 232 participants selected a monetary reward and 109 the Yeti reward			44.8	74.3 Male	Zoetermeer	Zoetermeer	Netherlands	EU		2021	115845		on-board transponder, pre and post measurement surveys, travel log	opt-in random car owners	13 weeks.		0.148261		April-August, 2006. pre-test, credit, non-credit, post-test		1 week	quasi-experimental design	collected data, pre and post measurement surveys,	randomized control	counterbalanced (blocked randomization)	quasi-experimental design; counterbalanced (blocked randomization) design	logbook		1	Quasi-experiment	Quasi-experiment	Yes	No		Yes	Yes	NA	Unclear	High
310	310	310	Sweden car use reduction intervention			2008			184	184. 71 households (33 in the experimental group and 38 in the control group)			53 years	52% woman (treatment); 46% woman (control)			Sweden	EU					Pre/post-intervention questionnaire, prospective car diary				0.158482	0.666667				RCT	Pre/post-intervention questionnaire & 1-week travel diary, prospective car diary for next week	randomized control		3.5 month	Personal norm and car habit strength, SRHI, index variable of car habit strength was calculated using the mean of the 12 items. Identical car diaries		1	RCT	RCT	Yes	Yes		Yes	Yes	Medium	Yes	Medium
31102	311	311	Sapporo city school intervention: Advice			2005			292	292. 155 (advice), 137 (planning group)			fifth grade students (10 and 11 years old)		Sapporo city	Sapporo	Japan	Asia		2005	2601251		3-day activity-travel diary, questionnaire	school								CBA	3-day activity-travel diary, questionnaire						1	CBA	CBA	Unclear	No		Yes	Yes	NA	No	High
31101	311	311	Sapporo city school intervention: planning group			2005			292	292. 155 (advice), 137 (planning group) from four homeroom classes			fifth grade students (10 and 11 years old)		Sapporo city	Sapporo	Japan	Asia		2005	2601251		3-day activity-travel diary, questionnaire						Six weeks prior to experimental intervention,		2 weeks	CBA	3-day activity-travel diary, questionnaire			control group is not established because the programs were implemented as actual educational programs for all the fifth-grade students in the school	frequency of car and public-transport use over three consecutive days (Sunday, Monday, and Tuesday), number of days the family car was used each month		1	CBA	CBA	Unclear	No		Yes	Yes	NA	No	High
313	313	313	Umea awareness experiment			2003			115	60 households; 115 subjects 66 subjects (33 households) in the experimental group 54 subjects (27 households) in the control group			43.7 years	49% men	Umeå	Umeå	Sweden	EU		2021	83249		7-day travel diaries and questionnaires	recruited by telephone from a group which participated in a survey	Spring of 1999		0.51497	0.697674	three phases (pre-treatment phase, treatment phase, and post-treatment phase) with a questionnaire and a travel diary in each phase		1 week	Cluster RCT	7-day travel diaries and questionnaires	randomized control	randomly assigned		Two measures of car habit, response frequency measure developed by Verplanken et al. (1994) and self-reported frequency of past car use, number of trips with car		1	RCT	RCT	Yes	Yes		Yes	Yes	Medium	No	High
31401	314	314	Göteborg car reduction experiment: charge			2002		charge	182	182 (Estimated). 80 households					Greater Göteborg	Göteborg	Sweden	EU		2000	844802	https://www.citypopulation.de/en/sweden/metrogoteborg/	Car logs, questionnaires	randomly selected sample of car owners								Cluster RCT	Car logs, questionnaires				Mean weekly trip frequency and driving distance in km were obtained from the car logs, odometer readings		1	RCT	RCT	Yes	Yes		Yes	Yes	Low to Medium	Yes	High
31402	314	314	Göteborg car reduction experiment: Charge + plan			2002		Charge + plan	182	182 (Estimated). 80 households					Greater Göteborg	Göteborg	Sweden	EU		2000	844802	https://www.citypopulation.de/en/sweden/metrogoteborg/	Car logs, questionnaires									Cluster RCT	Car logs, questionnaires						1	RCT	RCT	Yes	Yes		Yes	Yes	Low to Medium	Yes	High
31403	314	314	Göteborg car reduction experiment: Extend charge + plan			2002		Extend charge + plan	182	182 (Estimated). 80 households					Greater Göteborg	Göteborg	Sweden	EU		2000	844802	https://www.citypopulation.de/en/sweden/metrogoteborg/	Car logs, questionnaires									Cluster RCT	Car logs, questionnaires						1	RCT	RCT	Yes	Yes		Yes	Yes	Low to Medium	Yes	High
31703	317	317	Bochum and Dortmund experiment: Commitment			2006		Commitment	297	297 people (Commitment with preceding free ticket group: n = 130; commitment only group: n = 61; free ticket only group: n = 53; control group: n = 53)			185 male, 112 female	45.0 years	Bochum, Dortmund	Bochum, Dortmund	Germany	EU		2006		Bochum (approx. 400,000 inhabitants), Dortmund (approx. 600,000 inhabitants)	telephone interviews and a logbook record of 8 week	people living in areas with good access to public transportation were randomly selected from the telephone directory			0.474938	63	telephone interviews and a logbook record of 8 weeks with an additional interview within a 2-week follow-up recording 4 months later		4 months later	RCT	telephone interviews and a logbook record of 8 weeks with an additional interview within a 2-week follow-up recording 4 months later				Strength of car habit, response frequency measure,		1	RCT	RCT	Yes	Yes		Yes	Yes	Unclear	No	High
31701	317	317	Bochum and Dortmund experiment: Commitment + free ticket			2006		Commitment + free ticket	297	297 people (Commitment with preceding free ticket group: n = 130; commitment only group: n = 61; free ticket only group: n = 53; control group: n = 53)			185 male, 112 female	45.0 years	Bochum, Dortmund	Bochum, Dortmund	Germany	EU		2006		Bochum (approx. 400,000 inhabitants), Dortmund (approx. 600,000 inhabitants)	telephone interviews and a logbook record of 8 week	people living in areas with good access to public transportation were randomly selected from the telephone directory			0.474938	63	telephone interviews and a logbook record of 8 weeks with an additional interview within a 2-week follow-up recording 4 months later		4 months later	RCT	telephone interviews and a logbook record of 8 weeks with an additional interview within a 2-week follow-up recording 4 months later				Strength of car habit, response frequency measure,		1	RCT	RCT	Yes	Yes		Yes	Yes	Unclear	No	High
31702	317	317	Bochum and Dortmund experiment: Free ticket			2006		Free ticket	297	297 people (Commitment with preceding free ticket group: n = 130; commitment only group: n = 61; free ticket only group: n = 53; control group: n = 53)			185 male, 112 female	45.0 years	Bochum, Dortmund	Bochum, Dortmund	Germany	EU		2006		Bochum (approx. 400,000 inhabitants), Dortmund (approx. 600,000 inhabitants)	telephone interviews and a logbook record of 8 week	people living in areas with good access to public transportation were randomly selected from the telephone directory			0.474938	63	telephone interviews and a logbook record of 8 weeks with an additional interview within a 2-week follow-up recording 4 months later		4 months later	RCT	telephone interviews and a logbook record of 8 weeks with an additional interview within a 2-week follow-up recording 4 months later				Strength of car habit, response frequency measure,		1	RCT	RCT	Yes	Yes		Yes	Yes	Unclear	No	High
32102	321	321	Gouda experiment: Cost information			1998		Cost information	350	350. (N=280)					Gouda	Gouda	Netherlands	EU		2021	71952	medium-sized city	pre-test questionnaire,									RCT	pre-test questionnaire						1	RCT	RCT	Yes	Yes		Yes	Yes	Unclear	Yes	Unclear
32103	321	321	Gouda experiment: Environment + Cost information			1998		Environment + Cost information	350	350. (N=280)					Gouda	Gouda	Netherlands	EU		2021	71952	medium-sized city	pre-test questionnaire,									RCT	pre-test questionnaire						1	RCT	RCT	Yes	Yes		Yes	Yes	Unclear	Yes	Unclear
32101	321	321	Gouda experiment: Environmental information			1998		Environmental information	350	350. (N=280)					Gouda	Gouda	Netherlands	EU		2021	71952	medium-sized city	pre-test questionnaire,	random procedure								RCT	pre-test questionnaire	randomized control	random procedure		travel modes and mileage in a detailed trip diary		1	RCT	RCT	Yes	Yes		Yes	Yes	Unclear	Yes	Unclear
32104	321	321	Gouda experiment: Self-monitoring, No information			1998		Self-monitoring, No information	350	350. (N=280)					Gouda	Gouda	Netherlands	EU		2021	71952	medium-sized city	pre-test questionnaire,									RCT	pre-test questionnaire						1	RCT	RCT	Yes	Yes		Yes	Yes	Unclear	Yes	Unclear
32502	325	325	Copenhagen experiment: Customised Timetable			2008		Customised Timetable	597	597 (373 experimental subjects, 224 members of the control group)					Copenhagen	Copenhagen	Denmark	EU		2008	1165516		three waves of telephone interviews,	random sample of carowners, have a driver’s licence and a car at their disposal, commute to job or study at least once a week, and not having been a monthly travel card holder for mass transit			0.75		October and November 2002 and April 2003			CBA	three waves of telephone interviews,				(1) public transport use on a scale from 0 to 10, (2)self-reported habit index for cardriving, (3) psychological constructs regarding the use of mass transit		1	CBA	CBA	Yes	Yes		Yes	Yes	Low to Medium	Unclear	High
32501	325	325	Copenhagen experiment: Free travelcard			2008		Free travelcard	597	597 (373 experimental subjects, 224 members of the control group)			avg age was 43 (range 18-71)	44% females	Copenhagen	Copenhagen	Denmark	EU		2008	1165516		three waves of telephone interviews	random sample of carowners, have a driver’s licence and a car at their disposal, commute to job or study at least once a week, and not having been a monthly travel card holder for mass transit			0.75		October and November 2002 and April 2003			CBA	three waves of telephone interviews,				(1) public transport use on a scale from 0 to 10, (2)self-reported habit index for cardriving, (3) psychological constructs regarding the use of mass transit		1	CBA	CBA	Yes	Yes		Yes	Yes	Low to Medium	Unclear	High
32503	325	325	Copenhagen experiment: Free travelcard + customised timetable			2008		Free travelcard + customised timetable	597	597 (373 experimental subjects, 224 members of the control group)					Copenhagen	Copenhagen	Denmark	EU		2008	1165516		three waves of telephone interviews,	random sample of carowners, have a driver’s licence and a car at their disposal, commute to job or study at least once a week, and not having been a monthly travel card holder for mass transit			0.75		October and November 2002 and April 2003			CBA	three waves of telephone interviews,				(1) public transport use on a scale from 0 to 10, (2)self-reported habit index for cardriving, (3) psychological constructs regarding the use of mass transit		1	CBA	CBA	Yes	Yes		Yes	Yes	Low to Medium	Unclear	High
32505	325	325	Copenhagen experiment: Free travelcard + plan			2008		Free travelcard + plan	597	597 (373 experimental subjects, 224 members of the control group)					Copenhagen	Copenhagen	Denmark	EU		2008	1165516		three waves of telephone interviews,	random sample of carowners, have a driver’s licence and a car at their disposal, commute to job or study at least once a week, and not having been a monthly travel card holder for mass transit			0.75		October and November 2002 and April 2003			CBA	three waves of telephone interviews,				(1) public transport use on a scale from 0 to 10, (2)self-reported habit index for cardriving, (3) psychological constructs regarding the use of mass transit		1	CBA	CBA	Yes	Yes		Yes	Yes	Low to Medium	Unclear	High
32504	325	325	Copenhagen experiment: Plan			2008		Plan	597	597 (373 experimental subjects, 224 members of the control group)					Copenhagen	Copenhagen	Denmark	EU		2008	1165516		three waves of telephone interviews,	random sample of carowners, have a driver’s licence and a car at their disposal, commute to job or study at least once a week, and not having been a monthly travel card holder for mass transit			0.75		October and November 2002 and April 2003			CBA	three waves of telephone interviews,				(1) public transport use on a scale from 0 to 10, (2)self-reported habit index for cardriving, (3) psychological constructs regarding the use of mass transit		1	CBA	CBA	Yes	Yes		Yes	Yes	Low to Medium	Unclear	High
330	36	330	Australian Greenhouse Office, 2005	1		2005											Australia	Australia														before-and-after evaluations							4	BA	BA						NA
33102	24	331	Brog and Barta, 2007; Columbia City	1		2007		Columbia City	296						Columbia City	Columbia City	US	US	2983																				4		unclear						NA
33103	24	331	Brog and Barta, 2007; Crossroads	1		2007		Crossroads	290						Crossroads	NI			3462																				4		unclear						NA
33101	24	331	Brog and Barta, 2007; Lake Forest Park	1		2007		Lake Forest Park	346						Lake Forest Park	Lake Forest Park	US	US	5015																				4		unclear						NA
	24	331	Brog and Barta, 2007; Madison-Miller			2007		Madison-Miller	287						Madison-Miller	Madison-Miller	US	US	2740													before-and-after evaluations							4	BA	BA						NA
332	332	332	Cooper, 2007;			2007			1219	287 346 296 290							US	US														before-and-after evaluations	communitywide, controlled, random sample telephone survey before and after the program period. A controlled, two-wave bus stop count survey also was conducted.	non-randomized control	selected control area				1	BA	BA		Yes	selected control area
33201	332	332	Cooper, 2007;			2007		Madison-Miller	287						Madison-Miller	Madison-Miller	US	US	2740								0.1047						individual trip logs	control, no specific	control area		Bus Stop Counts		1	CBA	CBA	Unclear	yes	unclear type	Unclear	Yes	Unclear	Unclear	Unclear
33202	332	332	Cooper, 2007;			2007		Lake Forest Park	346						Lake Forest Park	Lake Forest Park	US	US	5015								0.069						individual trip logs						1	BA	BA	Unclear	Unclear		Unclear	Yes	Unclear	Unclear	Unclear
33203	332	332	Cooper, 2007;			2007		Columbia City	296						Columbia City	Columbia City	US	US	2983								0.0992						individual trip logs						1	BA	BA	Unclear	Unclear		Unclear	Yes	Unclear	Unclear	Unclear
33204	332	332	Cooper, 2007;			2007		Crossroads	290						Crossroads	NI	US	US	3462								0.0838								subarea level		automated passenger count (APC) data		1	CBA	CBA	Unclear	yes	comparable area	Unclear	Yes	Unclear	Unclear	Unclear
333	24	333	Portland Office of Transportation, 2007;	1		2007																										before-and-after evaluations							4	BA	BA						NA
334	24	334	Socialdata America, 2005;	1		2005																										before-and-after evaluations							4	BA	BA						NA
335	24	335	City of Portland Office of Transportation, 2006;	1		2006																										before-and-after evaluations							4	BA	BA						NA
336	24	336	City of Portland Office of Transportation, 2005).	1		2005																										before-and-after evaluations							4	BA	BA						NA
337	31	337	South Perth TravelSmart, 1997			1997									South Perth	Perth	Australia	Australia		2001	37606	https://www.citypopulation.de/en/australia/admin/																	4								NA
338	31	338	Met Bus Information and marketing Campaign			1997									Victoria	Victoria	Australia	Australia																					4								NA
339	31	339	Melbourne Tram and Info Marketing Campaign , 1997			1997									Melbourne	Melbourne	Australia	Australia		1997	3318807																		4								NA
340	340	340	Office (6 sites)			2010			7918	7918;300, 297, 1,314, 1,400, 2,303 (93%), 2,304 (69%)					Minneapolis	Minneapolis	US	US		2010		City 383067 Metro 3340010	counts						7:00 – 9:00 a.m., 11:00 a.m. – 1:00 p.m., and 4:00 – 6:00 p.m. to cover the peak traffic and parking periods	Fall of 2009		comparison with industry average	Trip generation and parking counts, Phone and email interviews were conducted during the Fall of 2009						1	post intervention	post intervention	Unclear	Unclear	Unclear	Unclear	Unclear	Unclear	Unclear	Unclear
341	341	341	Office (1 site)			2011			32						New South Wales	New South Wales	Australia	Australia		2021	7400000	data for New South Wales (NSW) (state)																	1
342	342	342	Office (1 site)			2007			64	Intervention: 32 Control: 32			49.2 years ± 8.8	63 women and 16 men	West of Scotland university (four campuses in the towns of Paisley, Blantyre, Dumfries and Ayr (Scotland) and one in London)	Paisley, Blantyre, Dumfries, London	Scotland	UK		2021		Paisley 76220 Blantyre not found Dumfries 33280 Ayr 47190		stratified randomization (gender, baseline step count)			0.609467	0.820513	baseline, 12, 24, 36, 48 and 60 week		12 weeks		Measures for step-counts, 7-day physical activity recall			2-way mixed factorial analyses	daily step-counts, self-reported physical activity		1	RCT	Experiment	Yes	Yes		Yes	Yes	Yes	Yes	Medium
343	343	343	Employment (20 sites)a	1		2010											UK	UK																					1
345	345	345	Residential (8 sites)	1		2014									London	London	UK	UK		2014	8536861																		1
34601	346	346	Residential (4 sites): Case–Control 1 (CC1)			2015		CC1	296	Case site: 242 Control site 54					Melbourne	Melbourne	Australia	Australia		2015	4429931		observational count data						March to May 2014		1 year	mixed-methods approach	comparisons with control sites. an assessment of car and bicycle parking utilization at the case and control sites was made. Comparisons of observed vehicle trip generation rates with published rates Comparisons of multimodal count data with regional travel survey data	non-randomized control	similar characteristics site		A count of people entering and leaving each access point, by transport mode, on a Tuesday (7:00 a.m. to 9:00 a.m.), Thursday (7:00 a.m. to 9:00 a.m.), and Saturday (10:00 a.m. to 1:00 p.m.) A count of the total supply and demand of car and bicycle parking facilities on a weekday, usually a Tuesday (7:00 a.m. and 9:00 a.m.), Thursday (7:00 a.m. and 9:00 a.m.), or both.		1	post intervention	post intervention		yes	non-random control site
34602	346	346	Residential (4 sites): Case–Control 2 (CC2)			2015		CC2	438	Case site: 282 Control site: 156					Melbourne	Melbourne	Australia	Australia		2015	4429931		observational count data									mixed-methods approach	(same as above)	non-randomized control	similar characteristics site		(same as above)		1	post intervention	post intervention		yes	non-random control site
34603	346	346	Residential (4 sites): Case–Control 3 (CC3)			2015		CC3	169	Case site: 124 Control site: 45					Melbourne	Melbourne	Australia	Australia		2015	4429931		observational count data									mixed-methods approach	(same as above)	non-randomized control	similar characteristics site		(same as above)		1	post intervention	post intervention		yes	non-random control site
34604	346	346	Residential (4 sites): Case–Control 4 (CC4)			2015		CC4	58	Case site: 24 Control site: 34					Melbourne	Melbourne	Australia	Australia		2015	4429931		observational count data									mixed-methods approach	(same as above)	non-randomized control	similar characteristics site		(same as above)		1	post intervention	post intervention		yes	non-random control site
350	350	350	Residential (1 site)			2012									New South Wales	New South Wales	Australia	Australia		2021	7400000	data for New South Wales (NSW) (state)										mixed-methods approach	(same as above)	non-randomized control	similar characteristics site		(same as above)		1	post intervention	post intervention		yes	non-random control site
351	351	351	hospital travel plan (1 site)			2016			682	2011: 804 2012: 904 2013: 872 2014: 682					New South Wales	New South Wales	Australia	Australia		2021	7400000	data for New South Wales (NSW) (state)					0.18		on-line survey averaged 23%, and was 25% at baseline, 26% in 2012, 24% in 2013 and 18% in 2014			mixed-methods approach	(same as above)	non-randomized control	similar characteristics site		(same as above)		1	post intervention	post intervention		yes	non-random control site
35202	352	352	Hospital (2 sites): Hollywood Private Hospital			2015		Hollywood Private Hospital	173	Hollywood Private Hospital: 173(2006), 445(2012)					Perth	Perth	Australia	Australia		2015	1894246		surveys									retrospective, controlled, before–after study	surveys						1	BA	BA	No	No		Yes	Yes	NA	Unclear	Unclear
35201	352	352	Hospital (2 sites): Queen Elizabeth II Medical Centre			2015		Queen Elizabeth II Medical Centre	650	QEII MedicalCentre: 650 (2006), 1041 (2012)					Perth	Perth	Australia	Australia		2015	1894246		surveys						all staff travel surveys which were conducted at the two adjoining sites in 2006 and in 2012			retrospective, controlled, before–after study	surveys						1	BA	BA	No	No		Yes	Yes	NA	Unclear	Unclear
359	5	359	Merom et al., 2005	1		2005
360	360	360	Brockman and Fox, 2011			2011			2292	1998, n = 2292 2001, n = 2332 2003, n = 1950 2005, n = 2647 2007, n = 2829			<25: 5.1 26-45: 59.8 46-55: 21.2 >56: 13.9	56.7 Female	Bristol	Bristol	UK	UK		2011	619145	Staff members of Bristol University	self-administered cross sectional surveys	University of Bristol Staff Travel Surveys					November 1998 and 2001, and was e-mailed for completion online in November 2003, 2005 and 2007.			Ecologic study, comparing groups in time	Questionnaire				employees’ usual mode of transport to work, categorised into ‘usually’ (four to five times per week), ‘sometimes’ (two to three times per week) and ‘occasionally’ (once or less per week)		1	BA	BA	No	No		Yes	Yes	NA	No	Unclear
361	361	361	Wen et al., 2005			2005			51	51			38.3	74.5% female	Sydney	Sydney	Australia	Australia		2005	3874825	health service employees working in the Queen Mary Building	panel survey	Face-to-face interviews			0.81	75% follow-up rate	September 2001 and 2002. ~1 month before the commencement of the individualized marketing strategy. The follow-up survey was conducted 2 months after the strategies had ceased.	September 2001 and 2002	2 months	Before–after design	Questionnaire				usual mode (only one choice of either walking, cycling, public transport or car) and detailed recall of each mode of transport for each trip on a normal working day (from dawn to midnight)		1	BA	BA	No	No		Yes	Yes	NA	No	High
362	362	362	O’Fallon, 2010*			2010			1587	1587							New Zealand	Australia				employees of the 27 joining workplaces	Questionnaire									Before–after design	Questionnaire			40 workplaces			1	BA	BA	No	No		Yes	Yes	NA	No	High
363	363	363	Goodman et al., 2013			2013			1300000	Intervention group (CDT/CCTs): 18/37 (2,751,198). No. units/sub-regions. Matched comparison group 18/27 (2,178,498)	English census data						UK	UK				Intervention group: 2,751,198. Matched comparison group = 2,178,498	census analysis									controlled before-after natural experimental	Longitudinal, controlled natural experiment	non-randomized control	three comparison groups (matched towns, unfunded towns and a national comparison group)		prevalence of cycling to work, defined as the proportion of commuters who reported cycling to be their usual, main mode of travel to work. secondary outcomes the prevalence of walking to work dtc		1	natural experiment	natural experiment	No	Yes	non-random	Yes	Yes	Low	Low	High
364	364	364	Thomas et al., 2009			2009			NA						Columbia	Columbia	US	US	100000	2010		(Data for Columbia, Maryland) City 99615 Metro 2715740	Questionnaire									Cross-sectional study	Questionnaire						1	CS	CS
365	365	365	Alcott and DeCindis, 1991			1991			701	Interviews: 701 licensed drivers living Traffic counts and bus ridership analysis: unknown		RTPA by O'Neil Associates, Inc.			Phoenix	Phoenix	US	US		-		City (1990) 983403 Metro (2010) 4204200	Telephone interviews, traffic counts and bus ridership analysis		February to March 1990				September 12-14 and October 3-6. The first set of counts during the campaign was taken October 17-19. Further counts were taken at least one time each month from November through February.	September 12-14 and October 3-6.		Before–after design	Telephone interviews, traffic counts and bus ridership analysis	matched comparison	comparison with earlier trends				1	BA	BA	No	No		comparison with earlier trends	Unclear	NA	No	High
366	366	366	James and Brög, 2001			2001			35000	35,000 people in 15,300 households					South Perth	South Perth	Australia	Australia		2001	37606	https://www.citypopulation.de/en/australia/admin/	Questionnaire		October 2000.							Before–after design	Questionnaire					inner/middle suburban area	1	BA	BA	No	No		Yes	Yes	NA	No	Unclear
367	24	367	Touwen, 1997	1		1997											Netherlands	EU																					4								NA	NA	NA
368	368	368	Reutter, 2004			2004			58	58					North Rhine-Westphalia (state)	North Rhine-Westphalia (state)	Germany	EU		2001	18052092	data for North Rhine-Westphalia (state) https://www.citypopulation.de/en/germany/admin/										Before–after design							1	BA	BA
369	369	369	Staunton et al., 2003			2003			4665	4665					Marin County, California	Marin County	US	US		2010	252904											Before–after design							1	BA	BA	Unclear	Unclear		Unclear	Unclear	Unclear	Unclear	Unclear
370	370	370	Boarnet et al., 2005			2005			1243	A total of 1778 parents completed the “before” survey and 1243 parents completed the “after” survey					California	California (State)	US	US		2010	37300000						Before = 1778 (51.75%); after = 1243 (38.59%)	0.6991				Before–after design	multiple case study design; surveys of parents of 3rd to 5th graders	no control	No; comparing the measured outcomes to expected outcomes	comparing the measured outcomes to expected outcomes	observed traffic counts, parent’s self-report of the child’s method of travel to and from school, and the parent’s own walking and bicycling in the neighborhood		1	BA	BA	No	No		Yes	Yes	NA	NA	Unclear
371	371	371	Orenstein et al., 2007	1		2007									California	California (State)	US	US		2010	37300000																		1
372	372	372	Rose and Marfurt, 2007			2007			1952	1952					Victoria (State)	Victoria (State)	Australia	Australia		2021	5710000		survey				35%-66%		December 2002 (two months after the event), February, March, April and July		two months after the event + 6 months	Before–after design	follow-up survey five months after the event				single day travel mode information		1	BA	BA	No	No		Yes	Yes	NA	Low	Unclear
373	24	373	Sarmiento et al., 2010	1		2010																																	4								NA	NA	NA
374	24	374	Gomez et al. (2005)	1		2005																																	4								NA	NA	NA
375	24	375	Parra et al., 2007;	1		2007																																	4								NA	NA	NA
376	24	376	IDU, 2009;	1		2009																																	4								NA	NA	NA
377	24	377	IDRD, 2004;	1		2004																																	4								NA		NA
378	24	378	Despascio, 2008	1		2008																																	4								NA		NA
379	24	379	Montezuma, 2005;	1		2005																																	4								NA		NA
380	380	380	Bowles et al., 2006			2006			918	918				72% (male)	Sydney	Sydney	Australia	Australia		2006	3903942																		1	BA	BA
381	24	381	Godbold, 2005	1		2005																																	4								NA		NA
382	24	382	Greig, 2001	1		2001																																	4								NA		NA
383	383	383	Tal and Handy, 2008	1		2008			1084	1084				55% (M)	Davis, California	Davis	US	US		2010	65584																		1
384	384	384	Telfer et al., 2006			2006			113	113; 81 post			(87%) were aged 25—54 years	(75%) were female	Sydney	Sydney	Australia	Australia		2006	3903942							0.716814	a precourse, end of course, and 2-month follow-up participant questionnaire	20 CPT courses	2-month follow-up,					participants were screened for minimum cycling ability and any medical conditions that would preclude them from physical activity	Bicycle riding history, cycling status		1	BA	BA	No	No		Yes	Yes	NA	No	high
385	385	385	Bauman et al., 2008	1		2008											Australia	Australia																					1
388	388	388	Minnesota			2006			130	130 (30 control + 100)					Minnesota (state)	Minnesota (state)	US	US		2010	5300000	data for Minnesota (state)	survey + electronic recorded data about each trip									control/treatment	survey + electronic recorded data about each trip						1	Experiment	Experiment
389	389	389	North Central Texas pay-as-you-drive insurance program			2009			93						North Central Texas	North Central Texas (State)	US	US				city not clear	odometer readings		2007-09-01						after six months and again after 12 months	before/after (practically just after-after comparison)	odometer readings			Baseline mileage was determined by odometer readings taken from recent emissionsand safety inspections			1	BA	BA
390	390	390	pay-as-you drive vehicle insurance: Dutch field experiment			2011			141	141							Netherlands	EU														RCT							1	RCT	RCT		Yes
391	3	391	Greaves and Fifer, 2013	1		2013
392	3	392	Belonitor trial	1		2006																																	4								NA		NA
393	3	393	vehicle-fleet experiment	1		2011																																	4								NA		NA
394	3	394	Pay as you speed, ISA	1		2012																																	4								NA		NA
396	396	396	sunday saver and seniors sunday pass	1		2007											Australia	Australia																					1
397	33	397	Perone and Volinski (2003)	1																																			3								NI	NI	NI
398	398	398	Brussels “free” public transport			2006			3162	3162, 1618 (51.2%) Flemish-speaking, 1544 (48.83%) to French-speaking universities, 40 interviews					Brussels	Brussels	Belgium	EU		2006	1867561		survey, Mental maps, interviews									descriptive	survey, Mental maps, interviews					students of Flemish colleges	1	post intervention	post intervention
399	399	399	free bus ticket experiment			2003			43	43 drivers [experimental group (23 subjects) and a control group (20 subjects)]			Control = 21.5 years (1.57); treatment = 22.6 (2.29)	almost all men except 3	Kyoto	Kyoto	Japan	Asia		2021	1459640	approximately 1.5 million residents	three questionnaires								one month	control/treatment	three questionnaires				frequency of automobile and bus use in the last month, the frequency of use per month, habit in travel mode choice	drivers, Kyoto University	1	RCT	RCT	Yes; maybe	Yes		Yes	Yes	Unclear	No	high
400	400	400	Copenhagen public transport as subscription			2009			597	597					Copenhagen	Copenhagen	Denmark	EU		2009	1178851			random sample of car owners			0.75		October and November 2002 and April 2003			control/treatment							1	RCT	RCT	Yes;	Yes
401	401	401	Breaking car use habits: free one-month travelcard.			2008			1000	1000					Copenhagen	Copenhagen	Denmark	EU		2008	1165516		3-wave questionnaire	people who had a driver’s license and a car at their disposal, who commuted to work or study at least once a week, who were not dependent on a private car on their job, and who had not been a monthly travelcard holder for public transport for at least a year			0.75	0.762838	first interview in October 2002, the second in November 2002, and the third in April 2003.		five months later	control/treatment		randomized control		allocation to experimental treatments was not completely random,	car habits (response frequency measure), Behaviour frequency was measured on a scale from 0 to 10,		1	Experiment	Experiment	Yes	Yes		Yes	Yes	Unclear	No	Medium
402	402	402	Trento, Italy.	1		2007			9000	9000					Trento	Trento	Italy	EU		2011	116298		survey										survey						1
40301	403	403	cashing out employer-paid parking			1997		5. Down town L.A	281			South Coast Air Quality Management District (SCAQMD).			Down town L.A	Los Angeles	US	US		2000 2010		City 3694820 Metro 12838400	survey		1993		100		first, second, or third year "after cashing out was offered	sample size was 1,208 commuters in 1990 and 2~625 commuters in 1994	1994	Before–after design					Solo Driver Share, Vehicle Trips to Work, Vehicle Miles Traveled to Work	law firm	1	BA	BA	No	NA		Yes	Yes	NA	No
40302	403	403	cashing out employer-paid parking			1997		8. Downtown L.A.	285			South Coast Air Quality Management District (SCAQMD).			Downtown L.A.	Los Angeles	US	US		2000 2010		City 3694820 Metro 12838400	survey		1993		100% in 1990 & 76% in 1995		first, second, or third year "after cashing out was offered		1995	Before–after design					Solo Driver Share, Vehicle Trips to Work, Vehicle Miles Traveled to Work	managed care medical provider	1	BA	BA	No	NA		Yes	Yes	NA	No
40303	403	403	cashing out employer-paid parking			1997		1. Century City	257			South Coast Air Quality Management District (SCAQMD).			Century City (neighborhood in Los Angeles)	Los Angeles	US	US		2021	7634	https://www.niche.com/places-to-live/n/century-city-los-angeles-ca/	survey		1993		87		first, second, or third year "after cashing out was offered	The sample size was 2,487 commuters in 1992 and 2,625 commuters in 1994	1994	Before–after design					Solo Driver Share, Vehicle Trips to Work, Vehicle Miles Traveled to Work	accounting firm	1	BA	BA	No	NA		Yes	Yes	NA	No
40304	403	403	cashing out employer-paid parking			1997		4. Century City	191			South Coast Air Quality Management District (SCAQMD).			Century City (neighborhood in Los Angeles)	Los Angeles	US	US		2021	7634	https://www.niche.com/places-to-live/n/century-city-los-angeles-ca/	survey		1993		89% in 1992 & 83% in 1994		first, second, or third year "after cashing out was offered	sample size was 2,487 commuters in 1992 and 2,625 commuters in 1994	1994	Before–after design					Solo Driver Share, Vehicle Trips to Work, Vehicle Miles Traveled to Work	legal services	1	BA	BA	No	NA		Yes	Yes	NA	No
40305	403	403	cashing out employer-paid parking			1997		3. Century City	120			South Coast Air Quality Management District (SCAQMD).			Century City (neighborhood in Los Angeles)	Los Angeles	US	US		2021	7634	https://www.niche.com/places-to-live/n/century-city-los-angeles-ca/	survey		1993		90% in 1990, 77% in 1992, 83% in 1993, and 85% in 1994		first, second, or third year "after cashing out was offered	2,548 commuters in 1991, 2,487 in 1992, 2,591 in 1993, and 2,625 in 1994	1994	Before–after design					Solo Driver Share, Vehicle Trips to Work, Vehicle Miles Traveled to Work	banking services	1	BA	BA	No	NA		Yes	Yes	NA	No
40306	403	403	cashing out employer-paid parking			1997		7. Santa Monica	300			South Coast Air Quality Management District (SCAQMD).			Santa Monica	Santa Monica	US	US		2000	84084		survey		1993		94% in 1994 & 83% in 1995		first, second, or third year "after cashing out was offered		1995	Before–after design					Solo Driver Share, Vehicle Trips to Work, Vehicle Miles Traveled to Work	law firm	1	BA	BA	No	NA		Yes	Yes	NA	No
40307	403	403	cashing out employer-paid parking			1997		6.Santa Monica	121			South Coast Air Quality Management District (SCAQMD).			Santa Monica	Santa Monica	US	US		2000	84084		survey		1993		83.8% in 1994 & 92% in 1995		first, second, or third year "after cashing out was offered		1995	Before–after design					Solo Driver Share, Vehicle Trips to Work, Vehicle Miles Traveled to Work	video and audio post-production	1	BA	BA	No	NA		Yes	Yes	NA	No
40308	403	403	cashing out employer-paid parking			1997		2. West Hollywood	139			South Coast Air Quality Management District (SCAQMD).			West Hollywood	Los Angeles	US	US		2000	35794		survey		1993		86% in 1991 & 91% in 1993		first, second, or third year "after cashing out was offered	The sample size was 2,487 commuters in 1991 and 2,591 commuters in 1993	1993	Before–after design					Solo Driver Share, Vehicle Trips to Work, Vehicle Miles Traveled to Work	government agency	1	BA	BA	No	NA		Yes	Yes	NA	No
40309	403	403	cashing out employer-paid parking			1997		all 8	1694	1694							US	US					surveys									Before–after design	surveys						1	BA	BA	No	NA		Yes	Yes	NA	No
404	24	404	West Edinburgh, Scotland			2006			997	997 households; 195 for the DCM					West Edinburgh, City of Edinburgh	Edinburgh	Scotland	UK		2001	449020	https://www.citypopulation.de/en/uk/admin/	stated preference (SP)	3000 survey at 3 streets	2003-07-01		0.332333					stated preference (SP)	discrete choice models			hypothetical choices				SP	other
40501	405	405	Martens (2007)			1995											Netherlands	EU																					3
40502	405	405	Martens (2007)			1995		Zevenbergen-Drie Hoefijzers							Zevenbergen-Drie Hoefijzers	Zevenbergen-Drie Hoefijzers	Netherlands	EU		2008		36724 data for Moerdijk (Municipality) contains both Zevenbergen-Drie Hoefijzers https://www.citypopulation.de/en/netherlands/admin/																	3
40503	405	405	Martens (2007)			1995		Oosterhout-Europaweg							Oosterhout-Europaweg	Oosterhout-Europaweg	Netherlands	EU		2021		Oosterhout 53107																	3
40504	405	405	Martens (2007)			1995		Oosterhout-Napoleonlaan							Oosterhout-Napoleonlaan	Oosterhout-Napoleonlaan	Netherlands	EU		2021		Oosterhout 53107																	3
40505	405	405	Martens (2007)			1995		Oosterhout-Elkhuizenlaan							Oosterhout-Elkhuizenlaan	Oosterhout-Elkhuizenlaan	Netherlands	EU		2021		Oosterhout 53107																	3
40506	405	405	Martens (2007)			1995		Oosterhout-Busstation							Oosterhout-Busstation	Oosterhout-Busstation	Netherlands	EU		2021		Oosterhout 53107																	3
40507	405	405	Martens (2007)			1995		Werkendam-Sleewijk							Werkendam-Sleewijk	Werkendam-Sleewijk	Netherlands	EU		2021		Werkendam 26362 Sleewijk not found Altena (Municipality) includes both and more villages (2008) 53222 https://www.citypopulation.de/en/netherlands/admin/																	3
40508	405	405	Martens (2007)			1995		Raamsdonkveer-Busstation							Raamsdonkveer-Busstation	Raamsdonkveer-Busstation	Netherlands	EU		2021	6590																		3
406	24	406	Bicycle parking, storage, and changing facilities	1		2009																																	4								NA		NA
407	24	407	Ecoplan, 2009;	1		2009																																	4								NA		NA
408	24	408	DeMaio, 2009a;	1		2009																																	4								NA		NA
409	24	409	Holtzman, 2008;	1		2008																																	4								NA		NA
411	24	411	bicycle-facilities	1		2008																																	4								NA		NA
412	24	412	Spicycles in Barcelona	1		2008									Barcelona	Barcelona	Spain	EU		2021 2008		City 1621537 Metro 4802558																	4								NA		NA
413	24	413	Nadal, 2007;	1		2007									Paris	Paris	France	EU		2007	10237542																		4								NA		NA
414	24	414	City of Paris	1		2007									Paris	Paris	France	EU		2007	10237542																		4								NA		NA
415	24	415	public use bicycle program in Philadelphia	1		2007									Philadelphia	Philadelphia	US	US		2010		City 1528280 Metro 5970900																	4								NA		NA
416	24	416	Velo'v	1		2009																																	4								NA		NA
417	24	417	Smart bicycles in London			2004			46	survey & system usage data, August 2004					London	London	UK	UK		2004 (inferred from N-desc yop/yoi missing)	7456170		survey & system usage data									Retrospective (cross-sectional study)	survey & system usage data						4	CS	CS						NA		NA
418	24	418	Smart bicycles in London	1											London	London	UK	UK		2021 (yop/yoi missing)	9425622																		4								NA		NA
419	24	419	Smart bicycles in London	1											London	London	UK	UK		2021 (yop/yoi missing)	9425622																		4								NA		NA
420	420	420	Noland and Ishaque			2006			46														Questionnaire									Retrospective (cross-sectional study)							1	CS	CS
421	421	421	public bicycle share program in Montreal, Canada			2013			2509	First season measurement (2009): n = 2502, Second season measurement (2010): n= 2509					Montreal	Montreal	Canada	US		2013	4003862		Telephone survey									Cross-sectional study	Telephone survey						1	CS	CS
422	5	422	Leeds			2004			41	14 (experimental) 27 (control)					Leeds	Leeds	UK	UK		2014	780000											experimental							4	Experiment	Experiment						NA		NA
423	5	423	Manchester			2004			53	17 (experimental) 36 (control)					Manchester	Manchester	UK	UK		2004	2414222											experimental							4	Experiment	Experiment						NA		NA
501	51	501	Mercy San Juan Hospital				1994		1400	1,400 employees					Carmichael, CA (Sacramento area)	Carmichael	US	US		2010	61762									1994-08-01	1995-08-01	cross-sectional case study approach	not a random sample of an entire population of employers						2.5	CS	CS	Unclear	No		Yes	Unclear		Unclear	Probably high
502	51	502	Rijnstate Hospital				1995		2350	2,350 employees					Arnhem	Arnhem	Netherlands	EU		2021	141674									1994	1995	cross-sectional case study approach	not a random sample of an entire population of employers						2.5	CS	CS	Unclear	No		Yes	Unclear		Unclear	Probably high
503	51	503	The Boeing Company				1942		76000	76000					Everett, WA (Seattle area)	Seattle	US	US		1940	30224									1974	1995	cross-sectional case study approach	not a random sample of an entire population of employers						2.5	CS	CS	Unclear	No		Yes	Unclear		Unclear	Probably high
504	51	504	Océ Nederland B.V.				1991		3000	3000					Venlo (Municipality)	Venlo (Municipality)	Netherlands	EU		2001	99541	https://www.citypopulation.de/en/netherlands/admin/								1991	1993	cross-sectional case study approach	not a random sample of an entire population of employers						2.5	CS	CS	Unclear	No		Yes	Unclear		Unclear	Probably high
505	51	505	National Oceanic and Atmospheric Administration (NOAA)				1990		5000	5000					Silver Spring, MD (Washington, DC area)	Washington, DC (area)	US	US		2010	71452									1990	1995	cross-sectional case study approach	not a random sample of an entire population of employers						2.5	CS	CS	Unclear	No		Yes	Unclear		Unclear	Probably high
506	51	506	Ministry of Transport, Public Works and Water Manage-ment				1991		1020	1020					The Hague	The Hague	Netherlands	EU		1991	604279									1991	1994	cross-sectional case study approach	not a random sample of an entire population of employers						2.5	CS	CS	Unclear	No		Yes	Unclear		Unclear	Probably high
507	51	507	City of Pasadena				1989		2000	2,000 at 32 sites; 820 at City Hall site					Pasadena, CA (Los Angeles area)	Los Angeles	US	US		1990	131591									1989	1990	cross-sectional case study approach	not a random sample of an entire population of employers						2.5	CS	CS	Unclear	No		Yes	Unclear		Unclear	Probably high
508	51	508	Province of Gelderland				1991		1100	1100					Arnhem	Arnhem	Netherlands	EU		2021	141674									before 3-1991	after 3-1991	cross-sectional case study approach	not a random sample of an entire population of employers						2.5	CS	CS	Unclear	No		Yes	Unclear		Unclear	Probably high
509	51	509	Southern California Gas				1984		1800	1800					Los Angeles, CA	Los Angeles	US	US		1980	2968580									1984	1994	cross-sectional case study approach	not a random sample of an entire population of employers						2.5	CS	CS	Unclear	No		Yes	Unclear		Unclear	Probably high
510	51	510	PTT Telecom				1993		615	615					Amersfoort	Amersfoort	Netherlands	EU		2021	139914									1993	1994	cross-sectional case study approach	not a random sample of an entire population of employers						2.5	CS	CS	Unclear	No		Yes	Unclear		Unclear	Probably high
511	51	511	Commonwealth Land Title				1993		100	100					Glendale, CA (Los Angeles area)	Los Angeles	US	US		1990	180038									1993	1994	cross-sectional case study approach	not a random sample of an entire population of employers						2.5	CS	CS	Unclear	No		Yes	Unclear		Unclear	Probably high
512	51	512	Nationale Nederlanden nv				1992		2520	2520					Rotterdam	Rotterdam	Netherlands	EU		1992	964269									1992	1994	cross-sectional case study approach	not a random sample of an entire population of employers						2.5	CS	CS	Unclear	No		Yes	Unclear		Unclear	Probably high
513	51	513	University of Washington				1989		52400	17,400 faculty and staff, plus 35,000 students					Seattle, WA	Seattle	US	US		1990 2010		City 516259 Metro 3449240								1989	1994	cross-sectional case study approach	not a random sample of an entire population of employers						2.5	CS	CS	Unclear	No		Yes	Unclear		Unclear	Probably high
514	51	514	Rijksuniversiteit Limburg (campus Randwijck)				1992		1600	1,600 faculty and staff (Randwijck)					Maastricht	Maastricht	Netherlands	EU		2021	122378										1994	cross-sectional case study approach	not a random sample of an entire population of employers						2.5	CS	CS	Unclear	No		Yes	Unclear		Unclear	Probably high
515	51	515	Logan International Airport				1991		14551	14,551 employees working for 127 companies					Boston, MA	Boston	US	US		1990	574283									1990	1995	cross-sectional case study approach	not a random sample of an entire population of employers						2.5	CS	CS	Unclear	No		Yes	Unclear		Unclear	Probably high
516	51	516	Airport Schiphol				1991		43000	43000					Amsterdam (15 km to CBD)	Amsterdam	Netherlands	EU		1991	946552									1991	1994	cross-sectional case study approach	not a random sample of an entire population of employers						2.5	CS	CS	Unclear	No		Yes	Unclear		Unclear	Probably high
517	51	517	Rick Engineering				1984		120	120					San Diego, CA	San Diego	US	US		1980 2010	City 875538 Metro 3103210									1990	1994	cross-sectional case study approach	not a random sample of an entire population of employers						2.5	CS	CS	Unclear	No		Yes	Unclear		Unclear	Probably high
518	51	518	Heidemij Consultancy				1990		425	425					Arnhem	Arnhem	Netherlands	EU		2021	141674									1991	1994	cross-sectional case study approach	not a random sample of an entire population of employers						2.5	CS	CS	Unclear	No		Yes	Unclear		Unclear	Probably high
519	51	519	Rockbestos Company				1993		300	300					East Granby, Connecticut (near Hartford)	East Granby	US	US		2010	5158									1990	1994	cross-sectional case study approach	not a random sample of an entire population of employers						2.5	CS	CS	Unclear	No		Yes	Unclear		Unclear	Probably high
520	52	520	Case Study 1 – West Midlands				2007		131	158 (2006/07), 150 (2007-08), 131 (2008/09)			3 and 11 years		West Midlands (Metropolitan County)	West Midlands (Metropolitan County)	UK	UK		2011	2739733	https://www.citypopulation.de/en/uk/admin/				3			2006/07 2007/08 2008/09	2006/07	2008/09	Before–after design	School Census Data						2	BA	BA	Unclear	No		Yes
521	52	521	Case Study 2 – South West				2007		124	129 (2006/07), 124 (2007-08), 127 (2008/09)			5 and 11 years		South West	South West (region)	UK	UK				city not clear				3			2006/07 2007/08 2008/09	2006/07	2008/09	Before–after design	School Census Data						2	BA	BA	Unclear	No		Yes
522	52	522	Case Study 4 – East of England				2006		362	362 (2006/07), 362 (2007-08), 364 (2008/09)					case Study 4 – East of England	East of England (region)	UK	UK				city not clear				3			2006/07 2007/08 2008/09	2006/07	2008/09	Before–after design	School Census Data						2	BA	BA	Unclear	No		Yes
523	52	523	Case Study 5 – Yorkshire and Humber				2006		98	106 (2006/07), 99 (2007-08), 98 (2008/09)					Yorkshire and the Humber (Region of England)	Yorkshire and the Humber (region)	UK	UK		2011	4273200	data for Yorkshire and the Humber (Region of England) https://ec.europa.eu/eurostat/databrowser/view/LFST_R_LFSD2POP__custom_1360525/default/table?lang=endata for				3			2006/07 2007/08 2008/09	2006/07	2008/09	Before–after design	School Census Data						2	BA	BA	Unclear	No		Yes
524	52	524	Case Study 7 – Yorkshire and Humber				2006		213	213 (2006/07), 214 (2007-08), 214 (2008/09)					Yorkshire and the Humber (Region of England)	Yorkshire and the Humber (region)	UK	UK		2011	4273200	data for Yorkshire and the Humber (Region of England) https://ec.europa.eu/eurostat/databrowser/view/LFST_R_LFSD2POP__custom_1360525/default/table?lang=endata for				3			2006/07 2007/08 2008/09	2006/07	2008/09	Before–after design	School Census Data						2	BA	BA	Unclear	No		Yes
525	52	525	Case Study 8 – East Midlands				2006		342	345 (2006/07), 342 (2007-08), 345 (2008/09)					East Midlands	East Midlands (region)	UK	UK		2016	4701311	https://ec.europa.eu/eurostat/databrowser/view/demo_r_gind3/default/table?lang=en				3			2006/07 2007/08 2008/09	2006/07	2008/09	Before–after design	School Census Data						2	BA	BA	Unclear	No		Yes
526	52	526	Case Study 3 – East of England				2006								East of England	East of England (region)	UK	UK				city not clear				3			2006/07 2007/08 2008/09	2006/07	2008/09								2	other	unclear		No		Yes
527	52	527	Case Study 6 – South East				2005		1344	1344 (2006/07), 1343 (2007-08), 1342 (2008/09)			11 and 18 years		South East	South East (region)	UK	UK				city not clear				3			2006/07 2007/08 2008/09	2006/07	2008/09		School Census Data						2	other	unclear		No		Yes
528	52	528	Case Study 9 – Yorkshire and Humber				2007		123	128 (2006/07), 123 (2007-08), 124 (2008/09)			5-16 years		Yorkshire and the Humber (Region of England)	Yorkshire and the Humber (region)	UK	UK		2011	4273200	https://ec.europa.eu/eurostat/databrowser/view/LFST_R_LFSD2POP__custom_1360525/default/table?lang=en				3			2006/07 2007/08 2008/09	2006/07	2008/09	Before–after design	School Census Data						2	BA	BA	Unclear	No		Yes
60101	601	601	Buckley et al., 2013: USA (Moscow, Idaho)			2013		Fallevent:Walking emphasis (%)	475	475 students for fall and 238students for spring, 45students					Moscow, Idaho	Moscow	US	US		2013		City 24529 Metro 38220	Count observation data, Surveys and interviews						(during, 1 day after) Duration: 1 day.	fall of 2011: 3days	spring 2012: 5days	Observational case study, Before–after design					AST measure: observation counts (trips to school only, walking and cycling combined).		1	BA	BA
60102	601	601	Buckley et al., 2013: USA (Moscow, Idaho)			2013		Spring event:Bicycling emphasis (%)	238	475 students for fall and 238 students for spring					Moscow, Idaho	Moscow	US	US		2013		City 24529 Metro 38220	Count observation data, Surveys and interviews							(during, 1 day after, 2 weeks after)	spring 2012: 5days	Quasi-experimental. Before–after design					AST measure: observation counts (trips to school only, walking and cycling combined).		1	Quasi-experiment	Quasi-experiment
603	603	603	Buliung et al. 2011 4 Canadian provinces: Ontario, Alberta, British Columbia, Nova Scotia			2011			1336	12 primary schools, 1489 parent questionnaires.					Ontario, Alberta, British Columbia, Nova Scotia (all provinces)	Ontario, Alberta, British Columbia, Nova Scotia (region)	Canada	US		-		Ontario (2021) 13600000 Alberta (2011) 3645000 British Columbia (2021) 4700000 Nova Scotia (2011) 921700								September 2012 and June 2013	1 year	Observational. Before–after design	Observational				student classroom survey + parent questionnaire (trips to/from school, all active modes combined)		1	BA	BA
604	604	604	Bungum et al. 2014: Las Vegas, USA			2014			1336	Sample: 2 schools (1 experimental and 1 control) . 638 (treat); 698 (control) 1336 students			ages 5-11		Henderson, Nevada, Las Vegas	Nevada	US	US		2014		City 274255 Metro 2053130			2014-10-01	pre-2 post (during, 1-week)			baseline (Week 0, May 2014),during the intervention(Week 7, July 014),and post-intervention (Week 20, October 2014).		1 week	Observational. Before–after design	counts				observation counts (trips to school only, all active modes combined).		1	BA	BA	Unclear	Yes		Yes	Yes	low to medium	No	Probably high
605	605	605	Christiansen et al. 2014: Denmark			2014			1014	14 schools (7 experimental and 7 control). . Intervention: Transport diary: n = 498; Questionnaire: n = 515 Comparison: Transport diary: n = 516; Questionnaire: n = 545			ages 11-13	Girls (%): 49.0, 48.2	Southern Denmark	Southern Denmark (region)	Denmark	EU				city not clear	5-day transportation diary		spring 2010	baseline and at a two-year follow-up	75.2	0.792807			2 year	RCT					5 day travel diary (trips to/from school, all active modes combined).		1	RCT	RCT	Yes	Yes		Yes	Yes	Medium	Yes	Probably low
606	606	606	Coombes et al. 2016: United Kingdom			2016			80	2 schools (1 intervention and 1 control); 80 students			ages 8-10.		Nowich	Nowich	UK	UK		2011	132512	data for Norwich, Nowich not found	Accelerometer for 7 days, travel diaries			pre-2 post (7-weeks, 20-weeks)	0.34	0.8875	Baseline, mid-intervention and post-intervention (20 weeks)	pre-2 post (7-weeks, 20-weeks)	7 weeks, 20 weeks	Quasi-experimental. Before–after design	Accelerometer for 7 days, travel diaries				travel diary (trips to/from school, all active modes combined).		1	Quasi-experiment	Quasi-experiment	No	Yes		Yes	Yes	Low	No	Probably high
607	607	607	Crawford & Garrard, 2013, Victoria, Australia [pilot schools]			2013			359	4 primary schools (2 control and 2 intervention)			10-13, but some younger also		Victoria (State)	Victoria (region)	Australia	Australia		2021	5710000		Qualitative and quantitative data		observational counts 2006, 2007						~1 year	Quasi-experimental. Before–after design	mixed methods study	matched comparison	two matched comparison schools		observation counts + student hands-up survey (trips to school only, all active modes combined).		1	BA	BA	No	Yes	matched comparison area	Yes	Yes	NA	No	Probably high
60801	608	608	Crawford & Garrard, 2013 (phase 2			2013			258	Baseline (n = 410) Followup (n= 358)	parent-reported data				Melbourne. Victoria	Melbourne	Australia	Australia		2013	4216555										6 months	Observational. Before–after design	mixed methods study				student hands-up survey and parent survey (trips to school only).		1	BA	BA
60802	608	608	Crawford & Garrard, 2013 (phase 2			2013			403	Baseline (n = 479 Followup (n = 403	student reported data				Melbourne. Victoria	Melbourne	Australia	Australia		2013	4216555																		1	BA	BA
609	609	609	Ducheyne et al. 2014: Belgium			2014			94	3 primary schools. “intervention” (25 children), the“intervention plus parent” (34 children) “control” (35 children)			9.3 ± 0.5 (9 to 10 years)	47.9% boys	Flanders, Belgium	Flanders	Belgium	EU		2014	6410000	https://www.statista.com/statistics/517196/population-of-belgium-by-region/			March 2012, post-data in April 2012 and follow-up in October 2012		0.96	0.764228	baseline, within 1 week after the last session, 5-months follow-up.		1-week, 5-month	RCT					parent reported (to/from school, time spent cycling only).		1	RCT	RCT	Yes	Yes		Yes	Yes	Medium	Maybe	Probably high
610	610	610	Goodman et al. 2016			2016			3336	3336 children whose school either had offered (n = 2563) or had not yet offered Bikeability (n = 773)		Millennium Cohort Study (MCS)	10-11	0.5			UK	UK						nationallyrepresentative sample of British children	January 2012 and August 2012.		0.477526					retrospective natural experiment.					parent-reported frequency of cycling (at least once a week vs. less), and whether cycling was children’s usual travel mode to school		1	natural experiment	natural experiment	No	Yes	staggered impleentation control	No	NA	Low to medium	Yes	Probably low
611	611	611	Gutierrez et al. 2014: Miami, USA			2014			NA	58 intersections near elementary schools (24 where a new crossing guard was present and 34 control)					Miami	Miami	US	US		2014		City 425110 Metro 5893860	counts + Safe Routes to School (SRTS) Parent Surveys		2011-2012	8	21.75% (pre-test) and 21.45% (post-test)		8 data collection periods. Pre-intervention data collection occurred in May/June 2011, November/December 2011 while post-intervention data collection occurred in November/December 2011 and April/ May 2012.			Quasi-experimental. Before–after design	counts of child and adult intersection crossing was documented via the School Monitoring Tool which consisted of an Instructional Sheet, Head Count Sheet, and Infrastructural/Environmental Notes Sheet.			intersection was the unit of analysis.	observation counts (to school only, walking and cycling examine separately and combined).		1	BA	BA	No	Yes	matched control	Yes	Yes	Low to medium	Unclear	Probably low
612	612	612	Henderson et al. 2013 Atlanta, USA			2013			658	one primary school (658 students)					Atlanta	Atlanta	US	US		2013		City 453990 Metro 5510530			2008–2010							Observational. Before–after design	2-page survey				parent-reported (to/from school); all active modes combined.		1	BA	BA				Yes
613	613	613	Hinckson et al. 2011a : New Zealand			2011			13631	33 primary schools. 13,631 students	secondary analysis				Auckland region	Auckland (region)	New Zealand	Australia		2011	1351275		Hands-up surveys		Baseline (2004) survey, Follow-up (2006)						10-6 months	Observational. Before–after design	longitudinal study using repeated measures on an annual basis			longitudinal study using repeated measures on an annual basis, comparing baseline to follow-up data.	student reported (to school only, all active modes combined).		1	BA	BA	No	NA		Yes	Yes	NA	No	Probably high
614	614	614	Hinckson et al. 2011b: New Zealand			2011			57096	56 primary schools. 57,096 students		School Travel Plan (STP) program	grades K-5 (5–10 years)		Auckland region	Auckland (region)	New Zealand	Australia		2011	1351275		roll surveys		surveys conducted between 2004 and 2008.						1-, 2- and 3-year. 4 to 16 months	Observational. Before–after design				percent mean counts at the school level and expressed as odds ratios	student reported (to school only, all active modes combined).		1	BA	BA	No	No		Yes	Yes	NA	No	Probably low
615	615	615	Hoelscher et al. 2016: Texas, USA			2016			3977	78 elementary schools. Schools were allocated to either of 3 conditions: “infrastructure” (n = 23), “non-infrastructure” (n = 21) or control group (n = 34).		Texas Childhood Obesity Prevention Policy Evaluation (T-COPPE) study	grade 4 students	half boys	Texas (State)	Texas (region)	US	US		2016	27900000		Serial cross-sectional surveys	Schools were recruited through districts	student self-report at baseline (2009), interim (2010, 2011), and follow-up (2012)				Baseline: March-December, 2009 Interim 1: May-June,2010 Interim 2: May-June,2011 Follow-up: April-May, 2012		3 year	Quasi-experimental. Before–after design		matched comparison	matched comparison/control		student reported (to/from school, all active modes combined).		1	Quasi-experiment	Quasi-experiment	No	Yes		Yes	Yes	NA	No	Probably low
616	616	616	Hunter et al. 2015: London, England Reading, England Vancouver, Canada			2015			3817	12 primary and secondary schools. n = 318 (8%) from Vancouver; n = 2507 (66%) from London, and n = 992 (26%) from Reading)			9-13 year olds (mean age 11.5 ± SD 0.7)	55% female	London, Reading, Vancouver	London, Reading, Vancouver	England, Canada	UK, US		2015		London 8661381 Reading 328863 Vancouver 2436967		baseline and week 4	2-month period (August-September)		0.54	0.495648			4-week	Observational	Mixed-Methods				Objective swipe card technology and child reports (to/from school, walking only). 5-day travel diary		1	other	other	No	No		Yes	Yes	NA
617	617	617	Johnson et al. 2016			2016		Bikeability	1345	1345	secondary?	2014 CensusAtSchool and the 2014 Bikeability School Travel Survey	year 5 and 6 students.				UK	UK												Bikeability administrative data (academic year 2013/2014), Bikeability School Travel Survey (2014)		retrospective case-control analysis					frequency of cycling to school as well as cycling in general (child report).		1	CS	CS	No	Unclear		Unclear	Unclear	NA	No	High
618	618	618	Johnson et al. 2016: England [CensusAtSchool]			2016		CensusAtSchool	1745	1745	secondary?	2014 CensusAtSchool and the 2014 Bikeability School Travel Survey	year 7-9 students.				UK	UK												CensusAtSchool (2013/2014),		retrospective case-control analysis					frequency of cycling to school as well as cycling in general (child report).		1	CS	CS	No	Unclear		Unclear	Unclear	NA	No	High
619	619	619	Mammen et al. 2014a: Canada			2014			7827	53 primary schools, 7827 questionnaires. Central = 12 schools, East = 21 schools, West = 20 schools			6-14 years				Canada	US					hands-up survey and school travel plans		January 2010 and March 2012	one year after baseline (September 2011)					1-year following implementation	retrospective analysis	baseline data (September 2010), take-home family survey (parent reported), hands-up classroom survey over five days (student-reported), environmental scan (i.e., walkabout)				parent questionnaire (to/from school, all active modes combined).asking students for five consecutive days, at both baseline and follow-up, how they got to school that morning and from school the previous afternoon		1	post intervention	post intervention	No	Unclear		Yes	Yes	NA	No	High
620	620	620	Mammen et al. 2014b : Canada			2014				53 primary schools							Canada	US													1 year	Observational. Before–after design					Student reported hands-up survey (to/from school, all active modes combined).		1	BA	BA	No	Unclear		Yes	Yes	NA	No	Probably low
621	621	621	McDonald et al. 2013: Oregon, USA			2013				9 primary schools and 5 middle schools (includes 9 experimental and 5 control schools).	secondary?	National Center for Safe Routes to School's student travel tally sheet + parent survey			Oregon (state)	Oregon (region)	US	US		2013	3900000		National Center for Safe Routes to School's student travel tally sheet + parent survey + own survey		between fall 2007 and fall 2011.							Quasi-experimental. Before–after design					student reported (to/from school, walking and biking combined).		1	Quasi-experiment	Quasi-experiment	No	Yes		Unclear	Unclear	Low	No	High
622	622	622	McDonald et al. 2014: Florida, Oregon, Texas, District of Columbia, USA			2014			65289	801 schools of which 83% were elementary schools (includes 378 experimental and 423 control schools) | 65,289 students.					Florida, Oregon, Texas, District of Columbia	Florida, Oregon	US	US		2014		Florida 19800000 Oregon 4000000 Texas 27000000 District of Columbia 662300									5 year	Quasi-experimental. Before–after design					student reported (to/from school, walking and biking combined).		1	Quasi-experiment	Quasi-experiment
623	623	623	McMinn et al. 2012: Glasgow, Scotland			2012			166	5 primary schools (2 experimental and 1 control). 166 students		Strathclyde Evaluation of Children's Active Travel (SE-CAT)	ages 8-9.	Male (%): 57	Glasgow	Glasgow	Scotland	UK		2012	1626863		Count + travel diary + questionnaire						Data were collected from Monday to Friday	Outcome measures were taken during 5 consecutive school days pre- and post-intervention.		Quasi-experimental. Before–after design					Step counts and MVPA measured by Actigraph accelerometers during the trips to and from school. Travel questionnaire. Travel diary		1	Quasi-experiment	Quasi-experiment	No	Yes	comparison	Yes	Yes	Low to Medium	No	High
624	624	624	Mendoza et al. 2011: Texas, USA			2015			149	8 primary schools (4 experimental and 4 control). 149 students			avg 10 years (4th-graders)	47% male	Texas (State)	Texas (region)	US	US		2015	27500000			cluster matched	spring of 2009	week before (time 1) and during weeks 4 and 5 of the intervention (time 2).	0.196629	90-100%				RCT					Student reported (to/from school, all active modes combined). weekly rate of active commuting	Low-income public elementary schools	1	RCT	RCT	Yes	Yes		Yes	Unclear	Medium	Low to Medium	Medium
625	625	625	Østergaard et al. 2015			2015			2401	Sample: 25 primary schools (13 experimental and 12 control). 2401 students			4th & 5th grade students.	48.8 (Control), 51.1 (treat) male	municipality of Copenhagen, Fredericia and on the island of Funen	Copenhagen	Denmark	EU		2016		Copenhagen 591481 Fredericia 50689 Island of Funen not found https://www.citypopulation.de/en/denmark/admin/	questionnaire		April and May 2010	2	~99%			baseline data collection in April and May 2010 and follow-up measurements were conducted one year later	1 year	Quasi-experimental					Student reported number of cycling trips to/from school in the past week (0-10 range)		1	Quasi-experiment	Quasi-experiment	No	Yes	non-random control	Yes	Yes	Medium	No	Medium
626	626	626	Sayers et al. 2012: Columbia, USA			2012			77	3 primary schools. 77 students			ages 8-9, wsb: 8.6 (1.6); comp: 8.1 (1.4)	wsb: 59; comp: 38 female	Columbia, Missouri	Columbia	US	US		2012	196540		7-day physical activity monitoring and physical activity surveys				0.118					Case control analysis	Case control analysis where the researchers compared accelerometry-	non-randomized control			Accelerometer 7 days		1	CS	CS	No; self-selected	Yes	self-selected	Unclear	Unclear	Medium	No	High
627	627	627	Stewart et al. 2014: Florida, Mississippi, Washington, Wisconsin, USA			2014				53 primary schools with SRTS projects; project (n = 48) and school (n = 53)		SRTS project tracking database			Florida, Mississippi, Washington, Wisconsin	Florida, Mississippi, Washington, Wisconsin	US	US		2014		Florida 19800000 Mississippi 3000000 Washington / District of Columbia 662300 Wisconsin 5800000										Observational. One-group pretest and posttest					student hands-up survey or observation counts (travel to school only). Assessed walking and biking separately and combined.		1	BA	BA		No
628	628	628	Vanwolleghem et al .2014			2014			58	2 primary schools. 58 students			ages 6-12 (mean = 9.7 ± 1.6 years).	Girls (62.1)	West-Flanders (Province)	West-Flanders (Province)	Belgium	EU		2015	1178996	https://www.citypopulation.de/en/belgium/admin/	pedometer and a diary		Spring 2013, baseline (April 2013) and intervention (May 2013)	2	0.43			(baseline and intervention) lasted one school week (Monday until Friday)		Observational. Before–after design	pedometer and parents filled out a diary, 11–12 year old children completed the diary independently			convenience sample (n = 8) of primary schools	child reported the number of active trips using the drop-off spot in a diary.		1	BA	BA	No	No		Yes	Yes	NA	No	Medium
629	629	629	Villa-González et al., 2016: Spain			2016			206	5 primary schools (3 experimental and 2 controls). 206 students			ages 8-11		provinces of Granada (Salobren˜a; Hue´tor Vega; Santa Fe; the city of Granada) and Jae´n (Castillo de Locoubı´n)	Granada (region) and Jae´n (Castillo de Locoubı´n)	Spain	EU		2020		Granada (province) 919168 Jaen (province) 631381 https://www.citypopulation.de/en/spain/admin/			2011/2012		0.417004			school days prior to (pre-intervention), immediately following (post-intervention) and after 6 month (follow-up) of the intervention programme in the months of January, June and November, respectively, of the academic year 2011/2012	6-month follow-up	Quasi-experimental. pre-post		matched comparison	matched comparison/control		student-reported number of walking and cycling trips in the previous week (range = 0-10 trips).		1	Quasi-experiment	Quasi-experiment	No	Yes	non-random control	Yes	Yes	Unclear	No	Unclear
630	630	630	Xu et al. 2015: China			2015			1182	8 primary schools (4 intervention and 4 control)			4th grade. Control: 10.2 ±0.5; Intervention: 10.2 ±0.5	53.7 male	Nanjing City	Nanjing City	China	Asia		2015	7391907		surveys	cluster randomized controlled trial	baseline and immediately-post-intervention in May 2011		0.90449	0.93824			1 year	RCT					Student reported school travel mode (to/from school, walking and cycling combined).		1	RCT	RCT	Yes	Yes		Yes	Yes	Medium	Unclear	Medium
63901	639	639	Healthy Homework (Duncan et al., 2011): pilot			2011			32	97 children (57 intervention, 40 control). For transport: 19 (intervention); 13 (control)					Auckland	Auckland	New Zealand	US		2011	1351275												Diary, Pedometers measures				Diary, Pedometers measures		1	other	Experiment
63902	639	639	Healthy Homework: RCT			2019			675	Intervention group (n = 346); Control group (n = 329). 16 New Zealand primary schools			Intervention: 8.71 (± 0.98). Control: 8.74 (1.04)	Intervention: 50.6%. Control: 52.9% female	Auckland	Auckland	New Zealand	US		2019	1582028			random number generator			0.576667	0.898844		01/07/11 and 24/07/12, with measurements staggered across every calendar month (excluding January and December) and school term (1–4); the last follow-up measure occurred at 07/04/13.		clustered RCT	screen-based sedentary time and selected dietary patterns assessed via parental proxy questionnaire, primary outcome measure, and was assessed using two sealed pedometers				Diary, Pedometers over five consecutive days (three weekdays, two weekend days)		1	RCT	RCT	Yes	Yes		Yes	Yes	Medium	No	Low
640	640	640	It’s Your Move!			2010			3040	intervention group (n = 5 schools); comparison group (n = 7 schools)		IYM programme	16.8 (1.14)	53.5% male			Australia	Australia									0.53	0.69				RCT					Survey* and interview		1	RCT	RCT
642	642	642	Stockholm County Implementation (Elinder et al., 2012)	1		2012			831				aged 6–16 years.				Sweden	EU									0.598			anthropometry (measured), and health behaviours assessed by a questionnaire, at baseline and after 2 years.									1
645	645	645	Heelan et al. (2009)			2009			324	201 (intervention); 123 (control). 2 WSB schools (n = 464) and control school (n = 227)			intervention: 8.1 ± 1.7 ; control: 8.4 ± 1.6	0.527363	Nebraska	Nebraska	US	US	30000				self-report logging tool & Accelerometers						3 times each year (fall, winter, spring)			quasi-experimental design	3 times a year (August, February, and May) self-report logging tool designed to capture mode of transport to and from school over a full week. Accelerometers, physical activity monitors for 4 consecutive weekdays on 2 separate weeks		yes		school-wide prevalence of walking to and from school. subsample of students from the WSB schools (INT) and the control school (CON) were assessed for total daily physical activity (using an ActiGraph LLC accelerometer)		1	Quasi-experiment	Quasi-experiment	No	Yes		Unclear	Unclear	Low	No
646	646	646	Ming Wen et al. (2008)	1		2008			1996	24 primary public schools. 1996 students and their parents.			aged 10–12 years		inner west Sydney	Sydney	Australia	Australia		2008		city not clear Sydney (city) 4032807										clustered RCT			yes		a survey completed by students on how they travelled to and from school over five days, and a survey completed by their parents on how their child travelled to and from school in a usual week		1	RCT	RCT
651	651	651	Lambe (2015)			2015			1457	Study 1: Primary Education: 5th–6th class students (n = 1457) in 21 primary schools (9 in intervention town 1; 5 in intervention town 2; and 7 in the control town). Study 2: Secondary Education: 1st, 2nd, the class students in 15 secondary schools (6 schools in intervention town 1; 5 in intervention town 2; and 4 in the control town).							Ireland	EU					Self-report questionnaires			2			May 2011-May 2013			Community-wide intervention study							1	other	CT
652	652	652	Lambe (2015)			2015			1091‬	1 intervention group & 1 control group.			15.1 (1.6); 15.3 (1.6)				Ireland	EU					quantitative + qualitative				78-82%		May 2012-May 2013	May 2012-May 2013, Dec-Jan 2013	5 months	quasi-experimental design						all girls school	1	Quasi-experiment	Quasi-experiment	No; unclear	Yes		Yes	Yes	Low to medium
	652	652	Lambe et al. (2017)			2017			1459	n = 1459. 5th–6th class students from all the 21 schools in 3 towns (n = 1038) students in 2 intervention towns; n = 419 students in 1 control town).			5th–6th class students	Female (%) = 45.5 (town 1); 46.8 (town 2); 56.1 (Control)			Ireland	EU	Town 1 : 25,000 Town 2: 12,300 Control: 17,900				Self-report questionnaires		May 2011 (baseline) and May 2013 (follow-up)	2	90.5% (range 87.2% - 94.5%)		May 2011-May 2013		two years later	Repeat cross-sectional study of a natural experiment	assisted self-report questionnaire with Illustrations of each travel mode	control, no specific	control town		“How do you usually travel to school?” (walk, cycle, car and bus)		1	CS	CS	No; unclear	Yes		Yes	Yes	Low to medium	No	Low to medium
1178	1178	1178	Quantified Traveler: Travel Feedback Meets the Cloud to Change Behavior			2015			78	135 total subjects, 78 used. Each subject is required to carry a smartphone with a QT app installed.	own	own	NA	27% M	San Francisco	San Francisco	US	US		2015		City 863000 Metro 4647920	app	convenience sampling		1	NA	NA	NA	Pre-experiment survey: NA App experiment: From March 18 to April 7, 2012 (3 weeks)	Post-experiment survey: NA	Pre-/Post-surveys + Experiment	QT’s long-term travel diaries; surveys		No	Pre-/Post-surveys: Likert scale method Experiment: App and webpage	Likert scale method; Experiment: App and webpage	UC Berkeley XLab	1	Experiment	Experiment	No; unclear	No	unclear	Yes	Yes	NA	No	High
1196	1196	1196	School mobility management case study: German School of Oporto (Deutsche Schule zu Porto)			2019			430	430 = valid responses for both surveys The pre-implementation survey received 285 responses, while the post-implementation survey received 145. In a universe of 652 students, this represents a response rate of 43.7% and 22.2%, respectively.	own	own	NA	NA	Oporto	Oporto	Portugal	EU	237591				revealed preference survey	convenience sampling		2	43.7% and 22.2%		two online surveys	March and May 2016	42491	pre- and post-intervention			No	During the summer semester 2016 a set of soft mobility management measures (5 measures) was implemented in a school (all levels). Measures assessed were: 1. Carpooling; 2. Park & Stride; 3. School Route Map; 4. Safe Parking Banners; 5. Tree of Life Contest. Impact was assessed with pre- and post-intervention online surveys.	scale ranging from 0 to 7. Specifically, the item assessed time spent in walking behaviour over the last 7 days ("During the last seven days, how many days have you walked for at least 10 minutes at a time?").		1	BA	BA	No	No		Yes	Yes	NA	No	Medium to High
1200	1200	1200	Using Messages Targeting Psychological versus Physical Health Benefits to Promote Walking Behaviour			2020			156	Analysed n = 156 Elegible for study n = 230 Accepted to participate n = 171	own	own	Mean = 19.74	19.2% Male	Naples	Naples	Italy	EU		2020	2186853		questionnaire	convenience sampling		3	0.855	0.912281		2019		RCT			Yes	Candidates assessed for elegobility were approached (n=200) and answered a pre-intervention questionnaire (T1) (n=171). At the end of T1 each student was allocated to one of the four conditions in a 1:1:1:1 ratio using an automatic individual randomisation sequence. Conditions were: Health messages + self-monitoring (HSM), Well-being messages + self-monitoring (WSM), Self-monitoring (SM) and Cont…			1	RCT	RCT	Yes	Yes		Yes	Yes	Unclear	No	Medium
1203	1203	1203	Impacts of personalized accessibility information on residential location choice and travel behavior			2020			282	Control n=135 Treatment n=147	own	own	<25 to >54	51.4% Male	Tippecanoe County	Tippecanoe County	US	US	170000				survey	convenience sampling		1				Pre: March to June 2014	August 2014 to October 2014	pre- and post-relocation			Yes	Impact of an interactive online accessibility mapping application (IOAMA) assessed with pre- and post-relocation surveys			1	BA	BA	Yes; unclear	Yes		Yes	Yes	High	Yes	Medium
1204	1204	1204	The Effects of Fare-Free Public Transport			2020			270	questionnaires collected and analysed	own	own	NA	NA	Frýdek-Místek	Frýdek-Místek	Czechia	EU	55931				survey with the residents of study area	convenience sampling		1				1 October 2018 - 31 December 2018		(1) interviews with city planning officials and (2) impact assessment with residents				Following the implementation of fare-free public transport policy (FFPT) in 2011, in 2018 (1) interviews with city planning officials and (2) impact assessment with residents survey			1	other	other
1211	1211	1211	personalized mobility based intervention			2020			52	Original sample 60. 12 of 52 in control group.	own + secondary	Own: Prompted recall survey Secondary: 'SPARROWS' App; online route planner platforms such as Graph Hopper Directions API; General transit feedback specification (GTFS)	NA	NA	Hasselt	Hasselt	Belgium	EU	77000				Primary data: pre/post questionnaires; App + prompted recall survey technique	convenience sampling		3				Pre data collection phase: 1 week travel diary Intervention Phase: 1 time personalised feedback (duration of phase 1 week)	Post data collection phase: 1 week travel diary	ICT based PTP intervention	activity-travel patterns, smartphone application; web-based prompted recall survey tool		Yes	ICT based PTP intervention	z-score: VMT in km was calculated from the individual activity travel-diary. Car dependency was quantified in the form of percentage, and was measured as a ratio of travelled distance via car and taxi with total travelled distance. (Distance travelled in km is also estimated form the individual activity-travel diary and post-processed to get the value in percentage)		1	BA	BA	Yes	Yes		Yes	Yes	Unclear	No; unclear	High
1212	1212	1212	Experimental Evaluation of Information Interventions: A Case Study in Hefei, China			2020			146	CG (n = 31) IG 1(n = 37) IG 2 (n = 39) IG 3 (n = 39) Sample recruitment: 304 households in a communit, of those 216 households registered at least one car in a community. After a WeChat-based 'honesty testing' survey was released, 31 residents failed to be connected in Wechat, 17 residents be connected but rejected and 22 residents were removed due to their invalid questionnaires. T1 n=146; T2 n=…	own	own	18 - 50<	64.7% Male	Hefei, capital of Anhui province	Hefei	China	Asia		2020	4241514	2M in urban area	surveys	stratified sampling method		3	0.675926			Before and after experiment: August 20, 2018 to September 2, 2018	Short term estimate: 3 September 2018 Long term estimate: 3 May 2020	3 experimental groups and 1 control group, between-group design			Yes	Three experimental groups and one control group based on a between-group design are adopted to do an experimental evaluation of the different effects of environmental and health information on encouraging car owners to travel on foot and by bicycle.			1	Experiment	Experiment	Yes	Yes		Yes	Unclear	Medium	No	Medium
1214	1214	1214	An RCT in travel demand management			2020			1967	sample size of 2023 employees. The sample was subdivided into four arms of five hundred each	own	own + 2016 biennial MIT Transportation Survey	Mean 50ys ST 12ys	Between 53-59% M	Boston	Boston	US	US		2020	694053		Passive data collection and survey-based self-reporting	convenience sampling		1	0.972318			Pre intervention data: September 2016 to April 2017 Intervention data: April 10, 2017 to May 23, 2017	7 months, until December 2017	Randomized Controlled Trial	Passive data collection and survey-based self-reporting		Yes	Experiment “Sustainable Commuting @ MIT.” Framed as a campaign encouraging low-carbon travel, the experiment was designed as an Randomized Controlled Trial. Sample was divided into 4 subgroups: one control arm and three experimental treatment arms (‘E1 Information’, ‘E2 Rewards’ and ‘E3 Both’)			1	RCT	RCT	Yes	Yes		Yes	Yes	Medium	No	High
1215	1215	1215	Disaster and unplanned disruption: Personal travel planning and workplace relocation in Christchurch, New Zealand			2020			624	pre-move survey (N=834), individual interviews with staff (N=1234) and a post-move survey (N=624) Total N is not clear, for there is an overlay of respondents between sub-samples but its not specified.	own	own	NA	NA	Christchurch	Christchurch	New Zealand	Australia		2020	398520		Survey and Individual interview	convenience sampling		3				Pre-move survey: NA Interviews: between November 2016 and March 2017	Post-move survey: between January and April 2017	pre and post surveys, individual interviews as treatment			Group A (no interview group) could be considered Control	Existing pre-condition, pre and post surveys, individual interviews as treatment and ANOVA analysis of results	How do you usually travel to and from your current work?		1	BA	BA	No	Unclear		Yes	Yes	NA	No	Medium
1217	1217	1217	Cycling for a Sustainable Future			2020			186	original n= 188 valid n = 186	own	own	Mean = 9 SD = 0.69	Nboys = 90, 48%; Ngirls = 96, 52%	Different cities in the region of Flanders, the Dutch-speaking northern part of Belgium	Flanders (region)	Belgium	EU	19693				Questionnaires	convenience sampling		1				pretest-post-test design with a two-week follow-up, and was conducted from February to June 2019. (As understood: Interventions lasted 2 weeks each, interventions in all six schools were done in 5 months)	1 data collection instance in a two-week follow-up	randomized pretest-post-test design			There is a 'Pretest of Stimuli Material' instance but its results are not referred to as control values. Page 8, Section 3.5	There is a 'Pretest of Stimuli Material' instance but its results are not referred to as control values. Page 8, Section 3.5	How do you usually go to school and back home	elementary schools	1	BA	BA	Yes	Unclear		Yes	Yes	NA	No	Medium
1218	1218	1218	Findings of a Cycle Street Intervention Study in the Rhine-Main Metropolitan Region, Germany			2020			701	total of 4014 households addressed resulted in 706 questionnaires returned, of which 5 were invalid	own	own	46 (mean)	49% Male	Offenbach am Main	Offenbach am Main	Germany	EU	140000	2021	119192		household survey	convenience sampling		1	17.6			March and April 2019	Data collection occurred six months after the implementation of the cycle street.	pre-post intervetion		non-randomized control	reference neighborhood	(Cycle Street Intervention six months prior) written household survey, self-regulated behavioral change (SSBC) based models Analysis by means of bivariate and multivariate statistical methods			1	BA	BA	No	Yes	reference group	No	No	Medium	No	Medium
1221	1221	1221	Moving to Private-Car-Restricted and Mobility-Served Neighborhoods			2019			127	Pre-survey: 26 out of 85 households answered the pre-survey in HOA Haninge and 70 out of 157 households in HOA Elvsjoe. Post-survey: 40 out of 85 households answered the post-survey in HOA Haninge and 87 out of 157 households in HOA Elvsjoe. Pre- and post-survey: 14 out of 85 households answered both the pre- and the post-survey in HOA Haninge and 32 out of 157 households in HOA Elvsjoe. Intervie…	own	own	NA	NA	Elvsjoe and Haninge	Elvsjoe and Haninge	Sweden	EU		2021		Elvsjoe (city not found) Haninge 74968	semi-structured interviews + Online surveys	convenience sampling		3	0.396694	0.190083	Sampling instances for 2 surveys and interviews	October/November 2017 and 2018		pre- and post-relocation			No	semi-structured interviews (2-waves: pre- and post-relocation) and surveys (pre- and post-relocation)		moving	1	BA	BA	Unclear	Unclear		Yes	Unclear	NA	Yes	Medium
1223	1223	1223	Testing salience and norm-based interventions in South Tyrol, Italy			2019			591		own	own	26-40	53% Male	South Tyrol	South Tyrol	Italy	EU		2019	531178	https://datacommons.org/place/nuts/ITD1?utm_medium=explore&mprop=count&popt=Person&hl=en	online survey	NA		1			NA	NA	No	Treatments were randomized; quasi-experimental			Yes	Treatments were randomized in the survey redirect page. In particular, participants were assigned in a between-subject fashion to either the baseline, the Salience or the Norm treatments. The three surveys were the same except from the additional treatment-information provided in the hypothetical scenarios stage.			1	Quasi-experiment	Quasi-experiment	Yes
1224	1224	1224	Teaming up for sustainability: Promoting sustainable mobility behaviour through sports clubs in Switzerland			2019			214	T1 total n= 122 (team cup n= 96, fitness cup n=26 ) T2 total n= 95 (team cup n= 73, fitness cup n=22 ) T3 total n= 82 (team cup n= 63, fitness cup n=19 )	own	own	Team cup sample Mean=35.4 Firness cup sample Mean=43	Team cup sample 43% Male Firness cup sample 32% Male	Winterthur	Winterthur	Switzerland	EU	113500				survey	convenience sampling		3			three online assessments	30 May 2016 - 8 July 2016; 8 July 2016 - 5 October 2016 ;	three months following the programme	Pre-post intervetion			No	(T1) Pre intervention online questionnaire, implementation of behaviour change programme (2 competitions targeted at either at formal social groups or individuals: ‘Team Cup’ for sports teams and ‘Fitness Cup’ for gym members), (T2) Post intervention online questionnaire, (T3) Follow up online questionnaire after 12 weeks	seven-point Likert scales		1	BA	BA	No	No		Yes	Yes	No	No	Medium to high
1225	1225	1225	Play&Go, an Urban Game Promoting Behaviour Change for Sustainable Mobility			2019			1079	total n = 1079 registered players valid n = 635 players (59% of the 1079 registrations) tracked one entire valid trip	own	own	<20 - >70 Most app users belong to 20-35 group (39% of sample) or 35-50 group (30% of sample)	56% Male	(Province of) Trento	Trento (region)	Italy	EU		2021	544745	https://www.citypopulation.de/en/italy/admin/trentino_alto_adige/022__trento/	questionnaires + interviews + game log analysis	convenience sampling		1				September 9, 2017 to March 3, 2018		VTBC game app (available for 6-months) (635 players), pre-post intervention			No	VTBC game app (available for 6-months) (635 players), pre-questionnaire (during registration in app), post-questionnaires via game app (94 responses) and post-semi-structured interviews (7)			1	BA	BA	Unclear; No	Unclear; No		Yes	Yes	NA	No	Low
1227	1227	1227	Applying a motivational stage-based approach in order to study a temporary free public transport intervention			2019			190	pre-intervention survey (n = 401) post-intervention survey (n = 190)	own	own	Mean = 48 SD = 11.7 Range = 25-77	45.8% Male	Värmland	Värmland	Sweden	EU		2019	281482	https://datacommons.org/tools/timeline#&place=nuts/SE311&statsVar=Count_Person	online surveys	convenience sampling		3			Voluntary inscription, pre-intervention survey and post-intervention survey	March 2017 - December 2017; Fall/Winter 2017		Pre-post intervetion			No		self-reported mode use over an average working week (5 days).		1	BA	BA	No	No		Yes	Yes	NA	No	Medium
1232	1232	1232	Modal Shift from Car to Bus: A French Case Study in a Rural Context Based on an Integrated Psychosocial Approach			2019			57	TG: 168 volunteers, 69 matched the inclusion criteria. 28 were present at the individualized counselling meeting where they completed the pre-test questionnaire (T1). Experimental attrition occurred: only 16 of the latter completed the follow-up questionnaire (T2) CG: 29 participants were recruited who matched the participants who took part in the program completed the pre-test questionnaire (T1)…	own	own			Abbeville, Amiens, Compiègne, and Creil	Abbeville, Amiens, Compiègne, and Creil	France	EU		2021		Abbeville 26461 Amiens 143086 Compiègne 44243 Creil 31863; between 24,000 and 135,000 inhabitants	questionnaire	convenience sampling; voluntary		2				completed the same questionnaire online twice with an interval of one month		experiment with control group, pre-post		matched comparison	Yes; matched participants	For TG: (1) individualized counseling meeting (2) first-time questionnaire (3) Participants completed the questionnaire a second time four to six weeks later (at the end of the bus test) (4) three months after the test, they were contacted by phone and asked whether they still took the bus and how frequently CG: completed the same questionnaire online twice with an interval of one month, at the s…	Bus use was measured in a four-point single-item scale.		1	Experiment	Experiment	No	Yes	matched participants	Yes	Yes	Unclear	No	High
1234	1234	1234	Association between innovative dockless bicycle sharing programs and adopting cycling in commuting and non-commuting trips			2019			1180	1265 respondents were sampled from 12 neighborhoods. However, 85 respondents were excluded from the analysis because > 20% of their data was missing	own	own	<30 - ≥ 50 40.8% 30 - 49	50.7% Male	Shanghai	Shanghai	China	Asia		2019	26317104		self-administered questionnaires: intercept interview	convenience sampling;		2	0.933		Trained interviewers conducted intercept survey around each survey site (12). Finally, at least 100 self-administered questionnaires were collected by intercept interview from each neighborhood and after an instance of attrition 1180 valid samples were recovered.	2017-05-01		intercept interview	self-administered questionnaires		No	A two-stage sampling method was used. First, Shanghai was divided into four areas: within the inner ring, between the inner and middle ring, between the middle and outer ring, and beyond the outer ring. Second, 3 neighborhoods were selected in each area by purposive sampling according to the following inclusion criteria: (1) > 1 km but < 2 km from the nearest subway station; and (2) population si…	(1) How did you travel most of the time before the advent of dockless bicycle sharing? (2) How do you travel most of the time after the advent of dockless bicycle sharing?		1	CS	CS	No	No				NA	No	Medium to Low
1235	1235	1235	The relationship between financial incentives provided by employers and commuters' decision to use transit: Results from the Atlanta Regional Household Travel Survey			2019			6576		secondary	Atlanta Regional Household Travel Survey 2011	Mean = 46	49% Male	Atlanta	Atlanta	US	US		2019		City 506800 Metro 6020360	mailed personalized diaries to report their travel for the assigned 24-h period. The survey also uses the global positioning system (GPS) to better understand trip characteristics from a subsample of households	stratified random sampling		1	63 percent.		One attrition instance occurred before running regression model after an outlier analysis	February 2011 to October 2011 with a break during the summer		Regression model based on Atlanta Regional Household Travel Survey 2011	personalized diaries to report their travel for the assigned 24-h period. The survey also uses the global positioning system (GPS) to better understand trip characteristics from a subsample of households		No	Survey process included several stages; advance notification, reminder postcard, recruitment, placement of material, reminder call, travel data retrieval and data processing"	transit equals “1” if the employee commuted on transit at least once a week and “0” otherwise		1	other	other	No	No		No	No
1241	1241	1241	The influence of information-based Transport Demand Management measures on commuting mode choice. Comparing web vs. face-to-face surveys			2017			648	n "residential" group total = 2960 n "residential" short term = 403 n "residential" long term = 389 n control group = 245 n control group long term = 243	own	own	Mean TG = 48 Mean CG = 47	44% Male TG 45% Male CG	Burgos	Burgos	Spain	EU	177000	2021	178966		surveys by phone, email and Survey Monkey	stratified sampling method		1	0.2015	0.9511	Two attrition stages from original sample in short and long term data collection instances	September 2014 to November 2015		PTP program, short and long term post-PTP surveys	SP exercise with 9 scenarios for commuting mode choice,		Yes				1	BA	BA	Unclear	Yes		Unclear	Yes	Unclear	No	Medium to High
1246	1246	1246	Modal Share Change following Implementation of Travel Demand Management Strategies			2018			516	First wave completed questionnaires: 2163 Second wave completed questionnaires: 740 Valid questionnaires for analysis: 516	own	own	18 - 80	40.6% Male (1st wave) 38% Male (2nd wave)	Cagliari	Cagliari	Italy	EU		2018	476053		web-based questionnaires	convenience sampling		3	32.5			April 2013 and February 2015		PTP (and light rail implementaion), pre-post		randomized control		First Wave Survey, PTP (and light rail implementaion), Second Wave Survey		new rail	1	BA	BA	Yes	Yes	randomized control group	Yes	Yes	Medium	Yes	Medium
1247	1247	1247	Effects of a Travel Behaviour Change Program on Sustainable Travel			2018			118	165 respondents. 85 and 80 individuals were assigned to the TBCP and the CG, respectively. 118 valid respondents for full study	own and secondary	Own: two wave survey research. Secondary: previous survey to study willingness to change from car and public transportation to non-motorised travel modes (also in Valencia, 2009)	<30 - 59	49.4% Male (avg between Treatment and Control Groups)	Valencia	Valencia	Spain	EU		2018	829879		panel survey, questionnaire	convenience sampling		2	0.335	0.71	Two attrition stages	Two-wave survey: autumn of 2010 and autumn of 2011, respectively		Two-wave survey with TBCP; Treatment group and Control Group			Yes	Two-wave survey with TBCP Treatment group and Control Group			1	CBA	CBA	No	Yes		Yes	Yes	Low to medium	No	High
1249	1249	1249	The effectiveness of an intervention to promote active travel modes in early adolescence			2018			169	Control Group n= 79 Treatment group = 90	own	own	12-14	46% Male	Vienna and Tulln Itzehoe	Vienna and Tulln Itzehoe	Austria Germany	EU		2018 2021 2021		Vienna 1900547 Tulln 12421 Itzehoe 31890 https://www.itzehoe.de/unsere-stadt/kennenlernen/zahlen-daten-fakten																	1	other	other
1254	1254	1254	Comparing Types of Financial Incentives to Promote Walking: An Experimental Test			2018			153	n= 153; 15 participants were lost, and an additional 31 did not provide data after the incentive was discontinued	own	own	Mean = 19 SD = 1.94	38.6% Male	No specified location. Study approved by University of Minnesota-Twin Cities, Minneapolis	Minneapolis (region)	US	US		NA		NA	Focus group, group lab sessions (3), online survey, pedometer app	convenience sampling		2	268 assessed for eligibility initially; 29 did not attend group lab session 1; 1 did not attend group lab session 2	0.724138	One attrition instance pre-experiment	the study was 8 weeks in length: 1 week of run-in (week 1), 5 weeks of experimental manipulation (weeks 2–6), and 2 weeks of follow-up (weeks 7–8). Data were collected between October and December.	2 weeks of follow-up (weeks 7–8)	pe-post; quasi-experimental			Yes	Participants had to attend three group lab sessions, which were held on the first day of weeks 1, 2, and 7. Incentives were contingent upon walking 10,000 steps per day on most days of the week (i.e. 4+ days per week)	walking was measured by a pedometer smart phone application (app). Mean Number of Weeks that the Walking Goal was Met while (A) Incentive was Offered and (B) After it was Discontinued by Condition		1	Quasi-experiment	Quasi-experiment	Yes	Yes	hanging control condition		Yes	Unclear	No	Medium to high
1255	1255	1255	Trip Characteristics Analysis of the Effects of a Travel Behavior Change Program			2018			118	Control Group n= 46 Treatment group = 72	own	own	<30 - >50	CG 41% Male TG 57% Male	Valencia	Valencia	Spain	EU		2018	829879		two-wave panel survey	NA			492 individuals agreed to participate in the panel survey. Finally, 165 provided complete information in the first wave, being (33.5% of initial 492). 118 individuals participated in both survey waves (final response rate was 24%).	Between the two waves, 47 respondents abandoned the panel		Fall 2010 and Fall 2011		survey waves consisted of three phases. First, a preliminary face-to-face interview: respondents were asked to generate a pre-planned activity-travel agenda for the following week starting the day after the interview. The second phase was developed during the research week, when respondents were using the mobile phone diaries. The third phase consisted of an in-depth telephone interview.			Yes		The level of use of private vehicles (PV) in both waves has been measured by considering the daily time allocated to PV use in relation to the total daily time allocated to travel per person		1	BA	BA
1257	1257	1257	The prospects of fare-free public transport: evidence from Tallinn			2017			3049	n first wave = 1538 n second wave = 1511	secondary	City of Tallinn	15 - >75	43% Male 1st Wave 43.9% Male 2nd Wave	Tallinn	Tallinn	Estonia	EU	420000				annual municipal survey	convenience sampling		2			Each survey wave had its own sampling instance	November 2012 and November 2013		First survey wave (pre-implementation), FFPT program and second survey wave (post-implementation after 1 year)			No				1	BA	BA
1258	1258	1258	Lessons learned from a personalized travel planning (PTP) research program to reduce car dependence			2017			109	Prospective Park and Riders who received PTP (Treatment group) n=86 Park and Riders ("Comparison" group) n=23 PP&R who didn't receive PTP (Control group) n=44 (!) Not referred to as CG in study	own	own	NA	NA	Cagliari and Quartu Sant’Elena (Sardinia)	Cagliari and Quartu Sant’Elena (Sardinia)	Italy	EU		2019		Cagliari 476131 Quartu Sant’Elena 70879	surveys + GPS tracking and activity diary app	convenience sampling		3			Two sampling ocurrances for each of the pre-intervention surveys and a third one for the final sample of the study	NA	(1) one week after provision of PTP (2) three months after intervention	pre-post intervetion			Page 860, Footnote 2 and Page 863, Footnote 7 states there was additional selection of 44 PP&Rs which did not receive PTP but its not considered as control group in the study	(1) targeting and selection of participants with two surveys, (2) promotion of behavior change with PTP, and (3) evaluation and monitoring of behavior change with app and post-intervention surveys			1	BA	BA
1259	1259	1259	Giving up cars - The impact of a mobility experiment on carbon emissions and everyday routines			2017			11	n = 11 households The participants were chosen from 22 applicants by the local PT authority. One condition of participation was that the participants sold (one of) their cars: they had to present a transfer certificate before the experiment started	own and secondary	secondary: travel cards use by participants provided by PT authority	NA	NA	Jyväskylä	Jyväskylä	Finland	EU	137000	2021	85026	137,000 residents	Survey + mobility surveillance + PT info	convenience sampling		1		0.818182	(A) pre-experiment survey (B) three mid-experiment survey instances + each participant also conducted one-week mobility surveillance three times during the experiment (C) post- experiment survey (D) follow-up survey after 6 months	January to June 2015		Experiment surveys; pre-post Experiment mobility surveillance	weekly mobility surveillance, complemented by the data from travel card reports		No	Pre-experiment survey (3) Experiment surveys Experiment mobility surveillance Post-esperiment survey Follow-up survey			1	Experiment	Experiment	No	No		Yes	Yes	NA	No	High
1264	1264	1264	Painting the fence: Social norms as economic incentives to nonautomotive travel behavior			2017			462	From 3961 respondnts of campus travel survey roughly 17% of the entire campus population of roughly 23,000, significant at the 99% Confidence Interval with a margin of error of ±1.68%.	own	own	NA	NA	Cal Poly campus	NI	US	US	45218			San Luis Obispo; Cal Poly campus (23000)	stated-preference survey	convenience sampling		1				Spring (March - June) 2015		experiment; randomised			No	Subjects were randomly selected out of the respondents of a campus travel survey (stated-preference survey) to participate in a parallel investigation, and were offered various incentives to change their travel. Individual trial participants were given the option to forfeit their right to a parking pass for one week, in exchange for the following randomly assigned incentives: (TG A) a $5 monetary…			1	Experiment	Experiment
1266	1266	1266	Social marketing and the built environment: What matters for travel behaviour change?			2017			179	179 persons in 113 households Wave 1 n = 313 households initial n = 332 households Wave 2 n = 201 households initial n = 213 households Wave 3 n = 144 initial n = 149 households	own	own	>14	47% Male 1st Wave CG n=96 45% Male 1st Wave TG n=245	Adelaide	Adelaide	Australia	Australia		2017	1225235		three waves of panel data with portable GPS device	convenience sampling		3			Attrition occurred during and in between the data collection waves	(pre intervention) Wave 1: 15 days per subject during March–June 2012	(post intervention) Wave 2: 15 days per subject during April-May 2013 and 2014 Wave 3: 15 days per subject during April-May 2014	First wave GPS survey, Social marketing programs as TDM measure (TravelSmart), and two follow up GPS surveys			Yes		number of trips per day, total trip time per day (min), and total trip distance per day (km).	Only selected suburbs of inner northern	1	BA	BA	Unclear	Yes		Yes	Yes	Yes	No	Medium to High
1268	1268	1268	The effects of the multimodal real time information systems on the travel behaviour			2017			50	Initial n = 50 Final n = 46	own	own	23 - 68	50% Male	Lyon	Lyon	France	EU	1300000				web-questionnaire and the focus group	stratified sampling method		1		0.92	Attrition occurred between the data collection waves	February 2013 and October 2013	five months after testing the application	ex-ante survey, Advanced Traveller Information Systems (ATISs) app testing and ex-post survey	quali-quantitative approach based on two tools - the web questionnaire and the focus group		No		1) travel habits; 2) attitudes towards mobility;	Metro area	1	BA	BA	No	No		Yes	Yes	NA	No	Medium
1269	1269	1269	Promoting sustainable travel modes for commute tours: A comparison of the effects of home and work locations and employer-provided incentives			2015			NA		secondary	2011 Oregon Household Activity Survey			Portland Metropolitan Area	Portland	US	US		2015	2381660		household survey	oversampling strategy by geography		1				2011		Three models which share the same control variables based on Household Activity Survey. In Model 1 (MNL), we include the variables that measure the built environment at home. In Model 2 (NL), the built environment at workplace is added. In Model 3 (NL), we add the two variables that represent employer-provided financial incentives. The specification of the three models in Table 4 were achieved by…	Series of MNL and NL models.		No	cross-sectional study	Tour-based analyses: Each tour represents a sequence of trips that start and end at home. Simple commute tour: Involves only one activity: work Complex commute tour: Involves other activities besides work If a tour involves more than one travel mode, the mode of the tour is determined by a priority order of modes: (1) drive to transit (mainly park and ride and kiss and ride); assumed to be availa…		1	CS	CS
1270	1270	1270	Impact of information intervention of urban residents with different goal frames: A controlled trial in Xuzhou, China			2016			452	608 valid baseline questionnaire samples were received, and 452 subjects were willing to take part in the experiment by providing their WeChat accounts. 392 concluded the study.	own	own	18 - 50<	54.6% Male	Xuzhou, Jiangsu Province	Xuzhou	China	Asia		2016	1965295	8.62M	Baseline questionnaire (T0) (travel goals, modal split data & travel attitudes) Second-stage questionnaire (T1)	convenience sampling		4	74.3	84.1	From total population (n=608) to sample (n=452) to clusters (3) to CG and IG for each cluster	November 13, 2015 to November 30, 2015	October 8, 2015 to November 12, 2015	experiment with control group			Yes	Baseline questionnaire (T0) (travel goals, modal split data & travel attitudes) WeChat information intervention with experimental group and the control group Second-stage questionnaire (T1)			1	Experiment	Experiment	Yes	Yes		Yes	Yes	Unclear	No	Medium
1274	1274	1274	The Effect of Free Bus Ticket Policy on Bus Taking Behaviors of Motorcyclists: Examining from the Electronic Ticket			2016			93	Initial n = 100 (n of free-bus-passes), Final n = 93 (n of valid questionnaires were collected after two stages)	own	own	<20 - >60	48.4% Male	Kaohsiung	Kaohsiung	Taiwan	Asia		2021	1519711		pre and after-test survey and record of e-bus-pass			1				NA		This research issued free-one-month travel pass. Two stages of surveys were realized, one was before the issuing of travel pass, and the other was after the revocation. In addition to survey data, electronic travel pass was tracked not only the bus-taking frequency, travel mirage, and travel time that traditional survey cannot achieve.			No		Times of using bus as commute mode in past one week		1	BA	BA
1275	1275	1275	Cycling promotion schemes in University of Sheffield			2016			488	total n (2010/2009) = 488 individual participants 361 participants in the 2009 initiative and 210 participants in the 2010 initiative (total 571 of which 83 participated both years) n considered (2010/2009) = 288 total n after intervention survey (2012) = 81	own and secondary	Own: Baseline and follow-up survey Secondary: Data from the University of Sheffield’s 2011 Travel Survey	Thirty percent of staff were aged under 35.	NA	Sheffield	Sheffield	UK	UK		2016	710346		Survey	convenience sampling		3		0.26		Cycle Challenge Baseline data 2009/2010 Data from the University of Sheffield’s 2011 Travel Survey	Follow-up survey July and August 2012	treatment and follow-up survey			No	Baseline survey(s), treatment and follow-up survey	cycling rate	University of Sheffield	1	BA	BA	No	No		Yes	Yes	NA	No	High
1277	1277	1277	Bike to work day			2016			320	383 Total submitted responses: online (338 ) and on paper (45)	own	own	NA	63% M	Curitiba	Curitiba	Brasil	EU		2016	3458333		Survey	convenience sampling		1			NA	May 8, 2015	NA	Flash surveys			No	Survey carried out on a 'Bike to Work Day' event. The campaign consisted in offering free parking space for cyclists in the city centre, discounts for cyclists in shops, free maintainance and guidance space, a bike counter was installed and 20 bikes were given away to event subscribers.	Likert scale indicator 1 to 5: 1 represents “I never cycle to work” and 5 “I always cycle to work”		1	other	other
1281	1281	1281	Free public transport: A socio-cognitive analysis			2016			670	random individuals who are assumed to make their own transport decisions (over 17 years of age)	own	own	Mean: 31, standard deviation: 15.41	male: 52.24%	Flanders (region)	Flanders (region)	Belgium	EU		NA	NA	6.2M (2010)	Stated preference survey	convenience sampling		1				mid-November 2012 to late January 2013		Stated preference methods			No	Stated preference methods Survey			1	SP	other
1282	1282	1282	Effect of travel behaviour change programmes on time allocated to driving			2016			165	492 accepted to participate in a subsequent research survey. Finally, 165 participated in the first wave, 118 individuals participated in both survey waves. In the second wave, 47 respondents who abandoned the study were replaced. New respondents were selected so as to be as similar as possible to those who left, in terms of demographic and socio-economic characteristics. Finally, there were 166 …	own and secondary	Own: two wave survey research. Secondary: previous survey to study willingness to change from car and public transportation to non-motorised travel modes (also in Valencia, 2009)	<30 - 59	49.7% Male	Valencia	Valencia	Spain	EU		2016	818344		two-wave activity scheduling process panel survey	convenience sampling		2	0.24	28.5%.	First sampling had 2 attrition stages. Second sampling incorporated new respondents to make second wave sample similar to first.	Two-wave survey: autumn of 2010 and autumn of 2011, respectively	492 firstly specified their willingness to contribute 165 respondents in the first survey wave with valid information	Two-wave survey with TBCP; Treatment group and Control Group	activity-travel diary on mobile devices, in-depth telephone interview.		Yes		the proportion of time allocated to travelling by PV to the total travel time		1	CBA	CBA	Unclear	Yes		Yes	Yes	Unclear	Unclear	Medium
1283	1283	1283	An impact assessment of a travel behavior change program: a light rail service in Cagliari, Italy			2015			130	No sample data for first survey. In this second survey 1579 questionnaires were filled in, of which 507 by car users identified as prospective park and riders (PP&Rs). Of a total of 176 car users selected (PP&Rs), 130 individuals were involved in the information strategy. 86 individuals, agreed to take part in the personalized travel plan program (PTP) and 44, not involved in the PTP, were monito…	own	own	NA	NA	Cagliari	Cagliari	Italy	EU		2015	473339		2 pre study surveys + 7-day activity-travel survey collecting data + Evaluation and monitoring survey	convenience sampling		2	0.488636			NA	during the second week only for the PTP approach and three months after completion of the program for the whole VTBC	PTP intervention and evaluation PTIM intervention and evaluation VTBC evaluation	7-day activity-travel survey collecting data (in- and out-of- home activities and trips), using an innovative device, the Activity Locator		Yes; comparison group	1st pre-study survey: To identify target behavior of study 2nd pre-study survey: To identify potential subjects PTP intervention and evaluation PTIM intervention and evaluation VTBC evaluation			1	BA	BA	No	Yes	comparison group	Yes	Yes	Unclear	Unclear	High
1285	1285	1285	Using Gamification to Incentivize Sustainable Urban Mobility			2015			20	Initial n = 40. 36 people made use of the system. In phase 1 there were 26 active participants; in phase 2 there were 29; and in phase 3 there were 26 players in Green Game with ViaggaRovereto. There were 20 participants who were active in all of the three experiment phases.	own	own	NA	NA	Rovereto	Rovereto	Italy	EU	40000				routing mobile App	purposive sampling (?)		1			Attrition occurred during and in between the data collection waves	Fall 2014		App based experiment consisting of three phases: phase 1 - baseline (1 week), phase 2 - recommendations without gamification (2 weeks), phase 3 - gamification (2 weeks)			No	Green Points (related to Km. travelled with sustainable transportation means), Health Points (related to Km. travelled biking or walking) and Park&Ride points (related to repeated usage of Park&Ride facilities)	Percentage of Km travelled for each mode of transport		1	Experiment	Experiment	No	No		Yes	No	NA	No	High
1286	1286	1286	When Nudges Aren’t Enough: Incentives and Habit Formation in Public Transport Usage			2020			32500																														1	Experiment	Experiment
34406	16		30 residential and mixed use developments in Melbourne, Australia	1				30 residential and mixeduse developments in Melbourne, Australia							Melbourne	Melbourne	Australia	Australia		2013	4216555																		3								NI	NI	NI
34402	16		Beddington Zero Energy Development (BedZED), South London, UK	1				Beddington Zero Energy Development (BedZED), South London, UK							London	London	UK	UK		2013	8414132																		3								NI	NI	NI
34404	16		Newcastle Great Park, Newcastle upon Tyne, UK	1				Newcastle Great Park, Newcastle upon Tyne, UK							Newcastle upon Tyne	Newcastle upon Tyne	UK	UK		2013	783079																		3								NI	NI	NI
34403	16		Poole Quarter, Poole, UK	1				Poole Quarter, Poole, UK							Poole Quarter, Poole	Poole	UK	UK		2011		Bournemouth, Christchurch and Poole (unitary destrict) 379441 https://www.citypopulation.de/en/uk/admin/																	3								NI	NI	NI
34405	16		Queen Elizabeth Park, Guildford	1				Queen Elizabeth Park, Guildford							London	London	UK	UK		2013	8414132																		3								NI	NI	NI
344	344		Residential (16 sites)			2013			1416	Study Residents (n = 1,416)				49% male	Arlington	Arlington	US	US		2013		City 378950 Metro 6753890	resident surveys, vehicle trip counts, parking occupancy calculations				25						resident surveys, vehicle trip counts, parking occupancy calculations						1	post intervention	post intervention
34407	16		Rouse Hill, New South Wales, Australia	1				Rouse Hill, New South Wales, Australia							New South Wales	New South Wales	Australia	Australia		2021	7400000	data for New South Wales (NSW) (state)																	3								NI	NI	NI
[truncated: 27 more columns]

## Sheet: Treats & Results--simplified
ID	Uniq	code	project reference	Treatments	Duplicates	N	N_before	N_after	Motivational	Descriptive	personal	advice	goals	Promotional	community-building	Incentives	(self) reflection	soft_infra	ICT	Mixed	Others	Scope	Scope_full	trip type	sub-categories	specific	specific (1)	specific (2)	Duration	started	ended	Frequency intervention	followup	Stat design	stat_methods	base_indicator	car_base	var_car_base	PT_base	var_PT_base	Bike_base	var_bike_base	walk_base	var_walk_base	active_base	var_active	others_ind	others_base	var_others_base
1	1	14	Stepchange pilot	very possiby data entry was done wrong.		1754			1				1	1								Work place	Work place, school		personalised travel planning, workplace and school travel planning	Living Neighbourhood / Living Change programmes	media relations campaign, personalised travel planning but also some elements of workplace and school travel planning,							before and after		car % mode split	24
2	2	14	Enﬁeld TfL pilot			235				1	1		1									individualized	individualized		travel planning/awareness campaign/PT marketing’	IndiMark approach	IndiMark approach; personalised journey plans coupled with generic travel and amenity information							before and after		Car (driver or passenger)	37		23		1		38				no car % mode split	74
3	3	14	Holland Park			102					1											individualized	individualized		travel planning/awareness campaign/PT marketing’	travel blending programmes								before and after		car % mode split	90.7
4	4	14	Adelaide – Dulwich		293	515					1											individualized	individualized		travel planning/awareness campaign/PT marketing’	travel blending programmes								before and after (without baseline #)		car % mode split	96.2
5	5	14	Liverpool			32															no information	Area-wide	Area-wide		travel planning/awareness campaign/PT marketing’									before and after		car % mode split	80
6	6	14	Reggio Emilia			691															no information	Area-wide	Area-wide		travel planning/awareness campaign/PT marketing’									before and after		car % mode split	83
7	7	14	Porto			421															no information	Area-wide	Area-wide		travel planning/awareness campaign/PT marketing’									before and after		car % mode split	78
8	8	14	Kassel			13012															no information	Area-wide	Area-wide		travel planning/awareness campaign/PT marketing’									before and after		car % mode split	80
9	9	14	Luxembourg			230															no information	Area-wide	Area-wide		travel planning/awareness campaign/PT marketing’									before and after		car % mode split	62
10	10	14	Stuttgart-Freiberg			5330															no information	Area-wide	Area-wide		travel planning/awareness campaign/PT marketing’									before and after		car % mode split	79
11	11	14	Marangaroo	large-scale		201	300	201			1											individualized	individualized		TravelSmart programme	TravelSmart programme	Individualised marketing		1 year					before and after		car % mode split	60
12	12	14	South Perth			1000					1											individualized	individualized		TravelSmart programme	TravelSmart programme	Individualised marketing			2000				before and after		car % mode split	94
13	13	14	Bern A			247															no information	NI	NI		travel planning/awareness campaign/PT marketing									before and after		car % mode split	69
14	14	14	Frome	pilot		500															no information	NI	NI		travel planning/awareness campaign/PT marketing									before and after		car % mode split	95
15	15	14	Oslo			1153															no information	NI	NI		travel planning/awareness campaign/PT marketing									before and after		car % mode split	71
16	16	14	Christies Beach			215															no information	NI	NI		travel planning/awareness campaign/PT marketing									before and after		car % mode split	97.1
17	17	14	Lisbon			548															no information	NI	NI		travel planning/awareness campaign/PT marketing									before and after		car % mode split	77
18	18	14	Copenhagen A			585															no information	NI	NI		travel planning/awareness campaign/PT marketing									before and after		car % mode split	79
19	19	14	York (12 h day)			500								1								Area-wide	Area-wide		travel awareness campaign	walking campaign			2 years					before and after		car % mode split	46.2						10.9
20	19	14	York (12 h day)			500								1								Area-wide	Area-wide		travel awareness campaign	walking campaign			2 years					before and after		car %, Mode share %, morning peak	42.6						12.5
21	20	14	Cologne			235															no information	Area-wide	Area-wide		travel planning/awareness campaign/PT marketing									before and after		car % mode split	81
22	21	14	Linz			15141															no information	Area-wide	Area-wide		travel planning/awareness campaign/PT marketing									before and after		car % mode split	81
23	22	14	Lisbon			548															no information	Area-wide	Area-wide		travel planning/awareness campaign/PT marketing									before and after		car % mode split	82
24	23	14	Wiesbaden			4632															no information	Area-wide	Area-wide		travel planning/awareness campaign/PT marketing									before and after		car % mode split	83
25	24	14	East Hampshire 2003			956	1115	956	1		1			1								Area-wide	Area-wide		PT promotion	promotion of rural buses, TAPESTRY project	TAPESTRY project. Interactive marketing experiment. development and promotion of public transport marketing materials			2003				before and after	questionnaires	car % mode split	87
26	25	14	Bishopsworth/ Hartcliffe project I			2500			1									1				Area-wide	Area-wide		individualised marketing project	part of the EU VIVALDI programme	Increasing social inclusion (by increasing awareness of travel opportunities), and the introduction of ‘Showcase’ bus improvements along a corridor passing through the wards			2002-09-01				before and after		car % mode split	47
27	26	14	Quedgeley pilot			177			1		1											individualized	individualized		individualised marketing programme	individualised marketing programme; information materials	Sustrans pilot projects		1 year					before and after		car % mode split	45
28	27	14	Arnhem			106															no information	NI	NI		travel planning/awareness campaign/PT marketing									before and after		car % mode split	98
29	28	14	Munich			229															no information	NI	NI		travel planning/awareness campaign/PT marketing									before and after		car % mode split	76
30	29	14	Cambridge (UK)			400	529	400														Area-wide	Area-wide		Area-wide public transport marketing, promotion and re-branding				1 year					before and after		car % mode split	60.5
31	30	14	Bremen (Germany)			189															no information	NI	NI		travel planning/awareness campaign/PT marketing									before and after		car % mode split	83
32	31	14	Salzburg (Austria)			5500															no information	NI	NI		travel planning/awareness campaign/PT marketing									before and after		car % mode split	84
33	32	14	Bishopston (UK)			5364					1		1									individualized	individualized		personalised travel planning interventions	personalised travel planning interventions				April-June 2003				before and after		car % mode split	38
34	32	14	Bishopston (UK)			5364					1		1									individualized	individualized		personalised travel planning interventions					April-June 2003				before and after		car % mode split	38
35	33	14	Borken (Germany)			410															no information	NI	NI		travel planning/awareness campaign/PT marketing				2 months					before and after		car % mode split	96
36	34	14	Delft/Den Haag (Netherlands)			124															no information	NI	NI		travel planning/awareness campaign/PT marketing									before and after		car % mode split	96
37	35	14	Halle (Germany)			154															no information	NI	NI		travel planning/awareness campaign/PT marketing									before and after		car % mode split	81
38	36	14	Armandale (UK)			210	247	210													no information	unclear	unclear		travel planning/awareness campaign/PT marketing				1 year					before and after		car % mode split	56
39	37	14	Frementle (France)			476	476	615													no information	unclear	unclear		travel planning/awareness campaign/PT marketing				3 yers					before and after		car % mode split	52
40	38	14	Bristol VIVALDI phase 1 (UK)			232			1						1			1				Area-wide	Area-wide		personalised travel planning	Increasing social inclusion (by increasing awareness of travel opportunities), and the introduction of ‘Showcase’ bus improvements along a corridor passing through the wards	EU VIVALDI programme			2002-09-01				before and after		car % mode split	48		11		0		19				Car passenger	23
41	38	14	Bristol VIVALDI phase 1 (UK)			232			1						1			1				Area-wide	Area-wide		personalised travel planning	Increasing social inclusion (by increasing awareness of travel opportunities), and the introduction of ‘Showcase’ bus improvements along a corridor passing through the wards	EU VIVALDI programme			2002-09-01				before and after		Mode share %	46		11		0		19				Car passenger	23
42	39	14	Helsinki (Finland)			176															no information	NI	NI		travel planning/awareness campaign/PT marketing									before and after		car % mode split	63
43	40	14	Gloucester (UK)	Pilot	62	445															no information	individualized	individualized		individualised marketing programme									before and after		car % mode split	97
44	41	14	Montpellier (France)			411															no information	NI	NI		travel planning/awareness campaign/PT marketing									before and after		car % mode split	97
45	42	14	Pinneberg (Germany)			501															no information	NI	NI		travel planning/awareness campaign/PT marketing									before and after		car % mode split	85
46	43	14	Leipzig (Germany)			188															no information	NI	NI		travel planning/awareness campaign/PT marketing									before and after		car % mode split	86
47	44	14	Magdeburg (Germany)			212															no information	NI	NI		travel planning/awareness campaign/PT marketing									before and after		car % mode split	86
48	45	14	Hannover-Südstadt (Germany)			40990															no information	NI	NI		travel planning/awareness campaign/PT marketing									before and after		car % mode split	75
49	46	14	York (morning peak) (UK)			500															no information	Area-wide	Area-wide		travel awareness campaigns				2 years					before and after		car % mode split	42.6
50	47	14	Liverpool (UK)			33															no information	NI	NI		travel planning/awareness campaign/PT marketing									before and after		car % mode split	88
51	48	14	Quedgeley large scale 2004 (2)			954															no information	Area-wide	Area-wide		individualised marketing programme					summer 2003				before and after		car % mode split	25
52	49	14	Frome pilot (UK)			282				1	1											individualized	individualized		individualised marketing project		development of a new walking, cycling and public transport guide for Frome and the surrounding area and TravelSmart website resources							before and after		car % mode split	47
53	49	14	Frome (UK)			NR																Area-wide	Area-wide		individualised marketing project					2001-2002				before and after		Mode share %	44		5		0		30				Car passenger	21
54	49	14	Frome pilot (UK)			282																individualized	individualized		individualised marketing project				1 year	2001	2002			before and after		Mode share %	44		5		0		30				Car passenger	21
55	50	14	Melville (Australia)			634	972	634			1											individualized	individualized		Individualised marketing				8 months					before and after		car % mode split	66
56	51	14	Bern B (Swiss)			27																unclear	unclear											before and after		car % mode split	82
57	52	14	Ludwigshafen (Germany)			197																unclear	unclear											before and after		car % mode split	91
58	53	14	Subiaco (Australia)			400		400			1											individualized	individualized		TravelSmart programme		Individualised marketing		5 years					before and after		car % mode split	56
59	54	14	Brisbane (Australia)	pilot		1100															no information	unclear	unclear		travel planning/awareness campaign/PT marketing									before and after		car % mode split	94
60	55	14	Nürnberg (Germany)			4940															no information	individualized	individualized		travel planning/awareness campaign/PT marketing									before and after		car % mode split	83
61	56	14	Vincent (Australia)			409	416	409														unclear	unclear						4 years					before and after		car % mode split	56
62	57	14	South Perth (Australia): pilot			706		706			1											individualized	individualized		Individualised marketing				1 year					before and after		car % mode split	60
63	58	14	Venice (Italy)			742															no information	unclear	unclear		travel planning/awareness campaign/PT marketing									before and after		car % mode split	63
64	59	14	Vollmar (Germany)			5655															no information	unclear	unclear		travel planning/awareness campaign/PT marketing									before and after		car % mode split	96
65	60	14	Bologna (Italy)			681															no information	unclear	unclear		travel planning/awareness campaign/PT marketing									before and after		car % mode split	74
66	61	14	Gloucester largescale (UK)			2018																Area-wide	Area-wide, individualized		Personalised travel planning					2003-07-01				before and after		car % mode split	54
67	61	14	Gloucester largescale (UK)			2018																Area-wide	Area-wide, individualized		Personalised travel planning					2003-07-01				before and after		Mode share %	49		5		3		22				Car passenger	20
68	62	14	Gloucester pilot (UK)			187																individualized	individualized		Personalised travel planning					2001-10-01				before and after		car % mode split	49
69	62	14	Gloucester pilot (UK)			187																individualized	individualized		Personalised travel planning					2001-10-01				before and after		Mode share %	44		4		2		27				Car passenger	23
70	63	14	Madrid (Spain)			382															no information	unclear	unclear		travel planning/awareness campaign/PT marketing									before and after		car % mode split	93
71	64	14	Baunatal (Germany)			6918															no information	unclear	unclear		travel planning/awareness campaign/PT marketing									before and after		car % mode split	93
72	65	14	Bristol Bishopston (UK)			5364																individualized	individualized		individualised marketing projects	individualised marketing projects				2003-05-01				before and after		car % mode split	44		6		4		37				Car passenger	15
73	65	14	Bristol Bishopston (UK)			5364																individualized	individualized		individualised marketing projects	individualised marketing projects				2003-05-01				before and after		Mode share %	37		6		4		37				Car passenger	15
74	66	14	Hampshire (UK)			162																unclear	unclear			Headstart' campaign								before and after
75	67	14	Kingston TfL pilot (UK)			793					1											individualized	individualized		IndiMark approach	personalised travel planning								before and after		car % mode split	48
76	67	14	Kingston TfL pilot (UK): interim results			793																individualized	individualized		IndiMark approach	personalised travel planning								before and after		Mode share %	42		16		3		21				Car passenger	17
77	68	14	Turin (Italy)			213															no information	Area-wide	Area-wide		travel planning/awareness campaign/PT marketing									before and after		car % mode split	66
78	69	14	Parma (Italy)			721															no information	Area-wide	Area-wide		travel planning/awareness campaign/PT marketing									before and after		car % mode split	87
79	70	14	Southwark TfL pilot (UK)			257			1		1											individualized	individualized, Residential		individualised marketing		individualised marketing with focus on car-owning HHs							before and after		car % mode split	50
80	70	14	Southwark TfL pilot (UK)			257			1		1											individualized	individualized, Residential		individualised marketing		individualised marketing with focus on car-owning HHs							before and after		Mode share %	41		22		5		19				Car passenger	8
81	71	14	Buckinghamshire County (UK)			3000															no information	Work place	Work place		travel planning/awareness campaign/PT marketing		Travel Choice’		5 years					before and after		car % mode split	71.3
82	72	14	Bike Busters (UK)			175															no information	Work place	Work place		travel planning/awareness campaign/PT marketing’				I year					before and after		car % mode split	80
83	73	14	Boots (UK)			7500						1		1		1		1				Work place	Work place		work travel plan	Displays of information, Direct mail, Staff consult, Group work, Slogan/brand, Recruit strategy of new employees,	Free shuttle travel, improvements in off-site infrastructure, Improved routes, ‘guaranteed ride home’ offer, car sharer incentives, dedicated car sharer parking	end-use facilities, Bicycle users group, Events to promote cycling, Cycle repairs service, Discounts on bikes, Walking end-use facilities, Security	4 years					before and after		Cars per 100 staff	65				7		6				no car %	35
84	74	14	Oxford Radcliffe Hospitals NHS Trust (UK)			5170						1				1		1				Work place	Work place		work travel plan	Displays of information, Events, Direct mail, Staff consult, Group work,	Parking charges, staff entitlement, loans, ‘guaranteed ride home’ offer	Improved routes, end-use facilities, Bicycle users group, Cycle mileage allowances, Walking end-use facilities, Security	1 year					before and after		Cars per 100 staff	58				12		13				no car %	42
85	75	14	Stockley Park (UK)			7700						1		1		1		1				Work place	Work place		work travel plan	Displays of information, Events, Direct mail, Staff consult, Group work, Slogan/brand,	improvements in the quality of bus services, improvements in off-site infrastructure, car sharer incentives	Improved routes, end-use facilities, Bicycle users group, Events to promote cycling, Cycle repairs service, Bicycle rental, Discounts on bikes, loan for cycles, Bicycle training or buddy scheme, Walking end-use facilities, Security	2 years					before and after		Cars per 100 staff	88				1		1				no car %	12
86	76	14	Agilent Technologies (UK)			1500								1		1		1				Work place	Work place		work travel plan	Displays of information, Events, Direct mail, Staff consult, Group work, Recruit strategy of new employees,	Discounts, improvements in the quality of bus services, improvements in off-site infrastructure, end-use facilities, dedicated car sharer parking	Events to promote cycling, Walking end-use facilities	2 years					before and after		Cars per 100 staff	71				3		5				no car %	29
87	77	14	Government Office for the East Midlands			245								1		1						Work place	Work place		work travel plan	Displays of information, Events, Staff consult, Recruit strategy of new employees	Discounts, loans, ‘guaranteed ride home’ offer, dedicated car sharer parking	Events to promote cycling, Discounts on bikes, loan for cycles, Cycle mileage allowances, ‘Walking funding’	2 years					before and after		Cars per 100 staff	45				3		5				no car %	55
88	78	14	Pfizer			5500						1		1		1		1				Work place	Work place		work travel plan	Displays of information, Events, Staff consult, Group work, Slogan/brand, Recruit strategy of new employees,	Free shuttle travel, Discounts, improvements in the quality of bus services, car sharer events, car sharer incentives	Improved routes, end-use facilities, Bicycle users group, Events to promote cycling, Bicycle rental, Discounts on bikes, Pool bicycles, Walking end-use facilities, Security, Marketing walking, ‘	2 years					before and after		Cars per 100 staff	75				6		2				no car %	25
89	79	14	Egg (UK)			880						1				1		1				Work place	Work place		work travel plan	Displays of information, Events, Direct mail, Staff consult, Group work, Recruit strategy of new employees,	Parking charges , More flexible payments, Free shuttle travel, improvements in the quality of bus services, loans,	end-use facilities, Events to promote cycling, Walking end-use facilities, Security	14 months					before and after		Cars per 100 staff	62										no car %	38
90	80	14	University of Bristol (UK)			4177						1		1		1		1				Work place	Work place		work travel plan	Displays of information, Events, Direct mail, Staff consult, Group work, Slogan/brand, Recruit strategy travel of new employees	Parking charges, staff entitlement, More flexible payments, Free shuttle travel, Discounts, improvements in the quality of bus services, ‘guaranteed ride home’ offer	Improved routes, end-use facilities, Bicycle users group, Events to promote cycling, Cycle repairs service, Discounts on bikes, loan for cycles, Cycle mileage allowances, Bicycle training or buddy scheme,Walking end-use facilities, Security, Marketing walking, ‘Walking funding’	3 years					before and after		Cars per 100 staff	44				7		19				no car %	56
91	81	14	Vodafone (UK)			5400						1				1		1				Work place	Work place		work travel plan	Displays of information, Direct mail, Recruit strategy of new employees,	Payments for using alternatives, Free shuttle travel, improvements in the quality of bus services, dedicated car sharer parking	Improved routes, end-use facilities, Bicycle users group, loan for cycles, Walking end-use facilities	34 months					before and after		Cars per 100 staff	84				2		8				no car %	16
92	82	14	AstraZeneca (UK)			4200						1		1		1		1				Work place	Work place		work travel plan	Displays of information, Events, Direct mail, Staff consult, Slogan/brand, Recruit strategy of new employees,	improvements in the quality of bus services, ‘guaranteed ride home’ offer, car sharer events, car sharer incentives, dedicated car sharer parking	Improved routes, end-use facilities, Bicycle users group, Events to promote cycling, Cycle repairs service, Discounts on bikes, loan for cycles, Pool bicycles, Cycle mileage allowances, Bicycle training or buddy scheme, Walking end-use facilities	4 years					before and after		Cars per 100 staff	90				2		0				no car %	10
93	83	14	Nottingham City Hospital NHS Trust (UK)			3500						1		1		1		1				Work place	Work place		work travel plan	Displays of information, Events, Direct mail, Staff consult, Group work, Recruit strategy of new employees,	Parking charges, improvements in the quality of bus services, improvements in off-site infrastructure,	Improved routes, end-use facilities, Bicycle users group, Events to promote cycling, Discounts on bikes, loan for cycles, Cycle mileage allowances, Walking end-use facilities, Walking funding’	1 year					before and after		Cars per 100 staff	73				5		8				no car %	27
94	84	14	Wycombe District Council (UK)			502								1		1		1				Work place	Work place		work travel plan	Displays of information, Events, Direct mail, Staff consult, Group work, Recruit strategy of new employees,	loans, ‘guaranteed ride home’ offer, car sharer incentives	Improved routes, end-use facilities´, Events to promote cycling, Cycle repairs service, Discounts on bikes,Walking end-use facilities, Security, Walking funding’	1 year					before and after		Cars per 100 staff	77				1		6				no car %	23
95	85	14	BP (UK)			2100										1		1				Work place	Work place		work travel plan	Displays of information, Direct mail, Staff consult, Group work, Slogan/brand, Recruit strategy of new employees,	Free shuttle travel, Discounts, improvements in the quality of bus services, improvements in off-site infrastructure,	Improved routes, end-use facilities, Bicycle users group, Discounts on bikes, Walking end-use facilities, Security, Walking funding’	25 months					before and after		Cars per 100 staff	84				3		5				no car %	16
96	86	14	Addenbrooke’s NHS Trust			4977						1		1		1		1				Work place	Work place		work travel plan	Displays of information, Events, Direct mail, Staff consult, Slogan/brand,	Parking charges, More flexible payments,Improved routes, ‘guaranteed ride home’ offer	end-use facilities, Bicycle users group, Events to promote cycling, Cycle repairs service, Bicycle rental, loan for cycles, Walking end-use facilities, Security	6 years					before and after		Cars per 100 staff	74				17		4				no car %	26
97	87	14	Buckinghamshire County Council (UK)			2200						1		1		1		1				Work place	Work place		work travel plan	Displays of information, Events, Direct mail, Staff consult, Group work, Slogan/brand, Recruit strategy of new employees, spent on publicity/promotion	Discounts, loans, ‘guaranteed ride home’ offer, car sharer incentives, dedicated car sharer parking	end-use facilities, Events to promote cycling, Cycle repairs service, Discounts on bikes, loan for cycles, Cycle mileage allowances, Bicycle training or buddy scheme, Walking end-use facilities, Security, Marketing walking, ‘Walking funding’	30 months					before and after		Cars per 100 staff	71				2		11				no car %	29
98	88	14	Orange (Almondsbury Park) (UK)			2000						1		1		1		1				Work place	Work place		work travel plan	Displays of information, Direct mail, Recruit strategy of new employees,	Free shuttle travel, improvements in the quality of bus services,	end-use facilities, Events to promote cycling, Discounts on bikes, Bicycle training or buddy scheme, Walking end-use facilities	37 months					before and after		Cars per 100 staff	92				1		2				no car %	8
99	89	14	Computer Associates (UK)			850								1		1		1				Work place	Work place		work travel plan	Displays of information, Events, Recruit strategy of new employees,	Payments for using alternatives, Free shuttle travel, improvements in the quality of bus services,‘guaranteed ride home’ offer, car sharer events, car sharer incentives, dedicated car sharer parking	end-use facilities, Events to promote cycling, Cycle repairs service, Discounts on bikes, Pool bicycles, Walking end-use facilities, Security, Marketing walking, ‘Walking funding’	16 months					before and after		Cars per 100 staff	89				1		1				no car %	11
100	90	14	Marks and Spencer Financial Services (UK)			1100						1		1		1		1				Work place	Work place		work travel plan	Displays of information, Group work, Slogan/brand, Recruit strategy of new employees,	Parking payments for car sharing, improvements in off-site infrastructure, ‘guaranteed ride home’ offer, car sharer events, car sharer incentives, dedicated car sharer parking	end-use facilities, Bicycle users group, Events to promote cycling, Cycle repairs service, Discounts on bikes, loan for cycles,	14 months					before and after		Cars per 100 staff	95				1		1				no car %	5
101	91	14	Plymouth Hospitals NHS Trust (UK)			4193						1				1		1				Work place	Work place		work travel plan	Displays of information, Events, Direct mail, Staff consult, Slogan/brand, Recruit strategy travel of new employees	Parking charges, staff entitlement, More flexible payments, Cash incentives for giving up parking space, Discounts, improvements in the quality of bus services,‘guaranteed ride home’ offer, dedicated car sharer parking	Improved routes, end-use facilities, loan for cycles, Bicycle training or buddy scheme, Walking end-use facilities, Walking end-use facilities, Security	6 years					before and after		Cars per 100 staff	78				2		1				no car %	22
102	92	14	HM Prison (UK)			650															no information	Work place	Work place		work travel plan				2 years					before and after		Cars per 100 staff	73.5										no car %	36
103	92	14	HM Prison (UK)			650															no information	Work place	Work place		work travel plan				2 years					before and after		Car driver or SOV	64										Car share or ‘multi-mode’	19
104	93	14	Buckinghamshire (2)			850							1									Work place	Work place		work travel plan				3 years					before and after		car % mode split	73.8
105	94	14	Bluewater			5500						1	1			1		1				Work place	Work place		work travel plan	Displays of information, Events, Direct mail, Staff consult, Slogan/brand, Recruit strategy travel of new employees,	staff entitlement, Free shuttle travel, Discounts, improvements in the quality of bus services, improvements in off-site infrastructure,	Improved routes, end-use facilities, Events to promote cycling, Cycle repairs service,	14 months					before and after		Cars per 100 staff	69				N/a		N/a				no car %	31
106	95	14	Royal Orthopaedic hospital 2000-2002			500															no information	Work place	Work place		work travel plan				2 years					before and after		Cars per 100 staff	70.5										no car %	38
107	95	14	Royal Orthopaedic hospital 2000-2002			500															no information	Work place	Work place		work travel plan				2 years					before and after		Car driver or SOV	62										Car share or ‘multi-mode’	17
108	96	14	Compass Group 1999-2003			400															no information	Work place	Work place		work travel plan				4 years					before and after		Cars per 100 staff	65.5										no car %	39
109	96	14	Compass Group 1999-2003			400															no information	Work place	Work place						4 years					before and after		Car driver or SOV	61										Car share or ‘multi-mode’	9
110	97	14	Local Government Ombudsman 1998 -2002			85															no information	Work place	Work place		work travel plan				4 years					before and after		Cars per 100 staff	75.5										no car %	27
111	97	14	Local Government Ombudsman 1998 -2002			85															no information	Work place	Work place		work travel plan				4 years					before and after		Car driver or SOV	73										Car share or ‘multi-mode’	5
112	98	14	Generics (UK)			220															no information	Work place	Work place		work travel plan				2 years					before and after		Cars per 100 staff	72.9
113	98	14	Generics (UK)			220															no information	Work place	Work place		work travel plan				2 years					before and after		Car driver or SOV	65.7										Car share or ‘multi-mode’	14.3
114	99	14	St Helen's College 1999- 2002			800															no information	Work place	Work place		work travel plan				3 years					before and after		Cars per 100 staff	83.5
115	99	14	St Helen's College 1999- 2002			800															no information	Work place	Work place		work travel plan				3 years					before and after		Car driver or SOV	77										Car share or ‘multi-mode’	17
116	100	14	Northfield Medical Centre 1999-2001			50															no information	Work place	Work place		work travel plan				2 years					before and after		Cars per 100 staff	87
117	100	14	Northfield Medical Centre 1999-2001			50															no information	Work place	Work place		work travel plan				2 years					before and after		Car driver or SOV	86										Car share or ‘multi-mode’	2
118	101	14	The Priory Hospital (UK) (1998-2001)			300															no information	Work place	Work place		work travel plan				3 years					before and after		Cars per 100 staff	84
119	101	14	The Priory Hospital (UK) (1998-2001)			300															no information	Work place	Work place		work travel plan				3 years					before and after		Car driver or SOV	79										Car share or ‘multi-mode’	10
120	102	14	Buckinghamshire County Council 1998-2003			410															no information	Work place	Work place		work travel plan				5 years					before and after		Cars per 100 staff	71.3
121	102	14	Buckinghamshire County Council 1998-2003			410															no information	Work place	Work place		work travel plan				5 years					before and after		Car driver or SOV	71.3										Car share or ‘multi-mode’	na
122	103	14	Chamber of Commerce (UK)			18															no information	Work place	Work place		work travel plan				1 year					before and after		car % mode split	56.6
123	104	14	(Temple Point)			400						1				1		1				Work place	Work place		work travel plan	Group work	Payments for using alternatives, staff entitlement, Cash incentives for giving up parking space, Free shuttle travel, Discounts,‘guaranteed ride home’ offer, car sharer incentives, dedicated car sharer parking	end-use facilities, Bicycle rental, Discounts on bikes, loan for cycles, Pool bicycles, Bicycle training or buddy scheme, Walking end-use facilities, Security	1 month					before and after		Cars per 100 staff	79				2		N/a				no car %	21
124	105	14	Cambridgeshire County Council (UK)			1100															no information	Work place	Work place		work travel plan				3 years					before and after		car % mode split	51
125	106	14	Government Office for East of England 2001-2002			290															no information	Work place	Work place		work travel plan				1 year					before and after		Cars per 100 staff	71.2
126	106	14	Government Office for East of England 2001-2002			290															no information	Work place	Work place		work travel plan									before and after		Car driver or SOV	69.5										Car share or ‘multi-mode’	3.4
127	107	14	ARUP (UK)			109															no information	Work place	Work place		work travel plan				4 years					before and after		car % mode split	41
128	107	14	ARUP (UK)			109															no information	Work place	Work place		work travel plan				4 years					before and after		Car driver or SOV	41
129	108	14	City council Transport. Department (UK)			562															no information	Work place	Work place		work travel plan									before and after		car % mode split	48
130	108	14	City council economic development department 1999-2003			387																Work place	Work place		work travel plan				4 years					before and after		Car driver or SOV	50										Car share or ‘multi-mode’	22
131	108	14	City council Transport. Department (UK) 1997-2001			578															no information	Work place	Work place		work travel plan									before and after		Car driver or SOV	48										Car share or ‘multi-mode’	20
132	109	14	University of Bristol (UK)			5000															no information	Work place	Work place		work travel plan									before and after		car % mode split	36
133	109	14	University of Bristol (UK)			5000															no information	Work place	Work place		work travel plan									before and after		Car driver or SOV	36										Car share or ‘multi-mode’	36
134	110	14	Cambridge City Council (UK)			800															no information	Work place	Work place		work travel plan				2 years					before and after		Cars per 100 staff	45.8
135	110	14	Cambridge City Council 2000-2002			800															no information	Work place	Work place		work travel plan				2 years					before and after		Car driver or SOV	34.7										Car share or ‘multi-mode’	22.2
136	111	14	WS Atkins 2001-2003			783															no information	Work place	Work place		work travel plan				2 years					before and after		Cars per 100 staff	53
137	111	14	WS Atkins 2001-2003			783															no information	Work place	Work place		work travel plan				2 years					before and after		Car driver or SOV	53										Car share or ‘multi-mode’	na
138	112	14	Economic Develop. Depart. City (UK)			423																Work place	Work place		work travel plan				4 years					before and after		car % mode split	50
139	113	14	Dental hospital 1998-2001			400															no information	Work place	Work place		work travel plan				3 years					before and after		Cars per 100 staff	41.5
140	113	14	Dental hospital 1998-2001			400															no information	Work place	Work place		work travel plan				3 years					before and after		Car driver or SOV	34										Car share or ‘multi-mode’	15
141	114	14	Cambridge University 2000-2002			6250															no information	Work place	Work place		school travel plan				2 years					before and after		Cars per 100 staff	40.7
142	114	14	Cambridge University 2000-2002			6250															no information	Work place	Work place		school travel plan				2 years					before and after		Car driver or SOV	35.7										Car share or ‘multi-mode’	10
143	115	14	Orange (UK)			700															no information	Work place	Work place		school travel plan									before and after		Cars per 100 staff	60
144	115	14	Orange (UK)			700															no information	Work place	Work place		school travel plan									before and after		Car driver or SOV	60
145	116	14	Norwich Union (UK)			1300															no information	Work place	Work place		school travel plan									before and after		car % mode split	37
146	116	14	Norwich Union (UK)			1300															no information	Work place	Work place		school travel plan									before and after		Car driver or SOV	37
147	117	14	Lancashire—primary schools (UK)			2911	3153	2911													no information	school	school		school travel plan				5 years					before and after		car % mode split	50.2
148	118	14	Redcar and Cleveland—primary schools (UK)			2173	2341	2173													no information	school	school		school travel plan				3 years					before and after		car % mode split	23.9
149	119	14	Thurrock—primary schools (UK)			4331	4532	4331													no information	school	school		school travel plan				4 years					before and after		car % mode split	39.6
150	120	14	Wrexham secondary (UK)			2463	2615	2463													no information	school	school		school travel plan	Yellow buses								before and after		car % mode split	19
151	121	14	Bedfordshire—lower school (UK)			3640	3679	3640													no information	school	school		school travel plan				1 year					before and after		car % mode split	40.2
152	122	14	Bedfordshire—middle school (UK)			1669	1693	1669													no information	school	school		school travel plan				1 year					before and after		car % mode split	23.9
153	123	14	Marlow CE Infant (UK)			186	186	186													no information	school	school		school travel plan				3 years					before and after		car % mode split	49
154	124	14	Runnymede Secondary (UK)			1349	1459	1349													no information	school	school		school travel plan									before and after		car % mode split	38
155	125	14	Bracknell Forest—primary school (UK)			904	828	904													no information	school	school		school travel plan				1 year					before and after		car % mode split	46
156	126	14	Leeds—primary schools (UK)			2317	2190	2317													no information	school	school		school travel plan				3 years					before and after		car % mode split	49.5
157	127	14	Shropshire—secondary schools (UK)			2692	2738	2692													no information	school	school		school travel plan				2 years					before and after		car % mode split	9.6
158	128	14	Telford & Wrekin—primary school (UK)			1854	1712	1854													no information	school	school		school travel plan				4 years					before and after		car % mode split	52.5
159	129	14	Hartlepool—primary school—March (UK)			813	837	813													no information	school	school		school travel plan				1 year					before and after		car % mode split	45.8
160	130	14	Lancashire—urban secondary schools (UK)			1734	1561	1734													no information	school	school		school travel plan				5 years					before and after		car % mode split	24.1
161	131	14	Wrexham Post 16 (UK)			70	161	70													no information	school	school		school travel plan									before and after		car % mode split	21
162	132	14	Stockport—primary schools (UK)			991	1029	991													no information	school	school		school travel plan				2 years					before and after		car % mode split	40.1
163	133	14	Shropshire—primary schools (UK)			2299	2218	2299													no information	school	school		school travel plan				2 years					before and after		car % mode split	27.6
164	134	14	Hebden bridge primary (UK)			146	179	146													no information	school	school		school travel plan									before and after		car % mode split	40
165	135	14	Redcar & Cleveland—secondary (UK)			1284	1265	1284													no information	school	school		school travel plan				3 years					before and after		car % mode split	35
166	136	14	Wrexham primary (UK)			47	80	47													no information	school	school		school travel plan									before and after		car % mode split	45
167	137	14	Little Kingshill Combined (UK)			262	262	262													no information	school	school		school travel plan				2 years					before and after		car % mode split	78.3
168	138	14	West Wycombe Combined (UK)			209	209	209													no information	school	school		school travel plan				2 years					before and after		car % mode split	78
169	139	14	Holy Trinity CE (UK)			266	266	266													no information	school	school		school travel plan				3 years					before and after		car % mode split	59
170	140	14	John Hampden Infant (UK)			275	275	275														Work place	Work place		unclear				3 years					before and after		car % mode split	55
171	141	14	Holmer Green Infant (UK)			180	180	180														Work place	Work place		unclear				3 years					before and after		car %	70		9		1		10				Car as Driver:	55
172	142	142	21 primary schools in boroughs of Camden and Islington	control		672		672				1										school	school		school travel plan		16 hours of expert assistance, Identiﬁcation of road safety issues, Walking School Bus operated Limited Drop-off zone, Minor safety interventions		NA					DiD		Children who walked to school, total (%)							70	16
173	142	142	21 primary schools in boroughs of Camden and Islington	treatment		714		714				1						1		1		school	school		school travel plan		16 hours of expert assistance, Identiﬁcation of road safety issues, Walking School Bus operated Limited Drop-off zone, Minor safety interventions		14 months					DiD		Children who walked to school, total (%)							65	22
174	142	142	21 primary schools in boroughs of Camden and Islington	treatment		714		714				1						1		1		school	school		school travel plan		16 hours of expert assistance, Identiﬁcation of road safety issues, Walking School Bus operated Limited Drop-off zone, Minor safety interventions		14 months					DiD		Children who walked to school, total (%)							65	22
175	143	143	public primary schools (n=61) located in the inner west of Sydney	treatment		683	983	683	1	1	1	1						1		1		school	school		school travel plan		Home to school mapping, Classroom learning materials. classroom activities, development of school Travel Access Guides, Parent newsletters and improving environments with local councils. professional development days for teachers, pedometer-based walking activities at some schools, resources on climate change and the comparative costs of active travel and driving a car		19 months					DiD		Morning — home to school all days (%)	30.4	14.4					23.9	11.9
176	143	143	public primary schools (n=61) located in the inner west of Sydney	treatment		683	983	683	1	1	1	1						1		1		school	school		school travel plan				19 months					DiD		Morning — home to school some days (%)	27.1	10.9	7.7	5.9			22.8	12.4
177	143	143	public primary schools (n=61) located in the inner west of Sydney	control (all days)		594	992	594														school	school		school travel plan				NA					DiD		Morning — home to school all days	30.9	12.8					30.4	14.4
178	143	143	public primary schools (n=61) located in the inner west of Sydney	control (some days)		594	992	594														school	school		school travel plan				NA					DiD		Morning — home to school some days	34.4	11	7.1	5.3			29.2	8.9
179	143	143	public primary schools (n=61) located in the inner west of Sydney	treatment		683	983	683	1	1	1	1						1		1		school	school		school travel plan		• Home to school mapping, • Classroom learning materials. classroom activities, development of school Travel Access Guides, • Parent newsletters and improving environments with local councils. • professional development days for teachers, • pedometer-based walking activities at some schools, • resources on climate change and the comparative costs of active travel and driving a car		19 months					DiD		Afternoon — school to home all days (%)	10.2	8.9					12.2	5.3
180	143	143	public primary schools (n=61) located in the inner west of Sydney	treatment		683	983	683	1	1	1	1						1		1		school	school		school travel plan				19 months					DiD		Afternoon — school to home some days (%)	45.1	18.8	8	4.4			33.3	8.8
181	143	143	public primary schools (n=61) located in the inner west of Sydney	control		594	992	594														school	school		school travel plan				NA					DiD		Afternoon — school to home all days (%)	10.9	6.2					12.8	9.9
182	143	143	public primary schools (n=61) located in the inner west of Sydney	control		594	992	594														school	school		school travel plan				NA					DiD		Afternoon — school to home some days (%)	44.7	16.8	8.8	5.7			34.2	10.5
183	144	144	Two primary schools in Scotland	intervention		31		31		1								1		1		school	school		school travel plan		Travel Access guide for schools, Council review of safety, Information resources and advice for curriculum and individuals, interactive travel-planning resources, ‘‘stage of behaviour change’’		2.5 months					DiD		mean distance travelled to school	2018	1302					198	338			Mean distance travelled from home to school (m)	2215	1159
184	144	144	Two primary schools in Scotland	control		29		29														school	school		school travel plan				NA					DiD		mean distance travelled to school	933	1195					242	267			Mean distance travelled from home to school (m)	1174	1098
185	145	145	walking school bus (WSB) program on student transport in a low-income, urban neighborhood (Three public elementary schools)	control		473		473														school	school		school travel plan		10–15 hours per week walking bus coordinator, Walking School Bus, Promotional material, Pedestrian safety education		NA					DiD		travel mode to school trip: proportions of students (control)	41	3	40	3			20	2
186	145	145	walking school bus (WSB) program on student transport in a low-income, urban neighborhood (Three public elementary schools)	intervention		347		347	1	1		1										school	school		school travel plan		10–15 hours per week walking bus coordinator, Walking School Bus, Promotional material, Pedestrian safety education		12 months					DiD		travel mode to school trip: proportions of students (treatment)	47	3	31	3			15	2
187	146	146	Bracknell Forest			3871						1										school	school				School travel advisors appointed to work with schools to develop school travel plans School travel advisors also do other work that contribute to reducing congestion and increasing sustainable travel Capital grants made available for some school travel plans		6-9 months					before and after (without baseline #)
188	147	147	Lancashire			47426												1				school	school			Classroom learning materials Travel Access guide for schools Council review of safety Walking School Buses	Walking School Buses		2–39 months					before and after		Baseline primary school car use	50.2
189	148	148	Redcar & Cleveland			10639			1													school	school			Information resources and advice for curriculum and individuals	Promotional and educational material		1–24 months					before and after		Baseline primary school car use	23.9
190	149	149	Telford & Wrekin			6360						1						1				school	school			10–15 hours per week walking USA bus co-ordinator Walking School Bus Promotional material Pedestrian safety education	Work with local government on safer routes to school		2–41 months					before and after		Baseline primary school car use	52.5
191	150	150	TAPESTRY 2003 Dublin			268			1	1												school	school			TAPESTRY	Information and promotion material		1 month					before and after		Baseline car use	44
192	151	151	TAPESTRY 2003 Herts			2293			1	1												school	school			TAPESTRY	Information and promotion material		1 week					before and after (without baseline #)
193	152	152	Walk in to Work Out			295		145	1	1	1											Work place	Work place			Walk in to Work Out	“Walk in to Work Out” educational campaign. Interactive self-help active travel information, local information about distances and routes, and safety information.		pack delivered at baseline, with no further subsequent intervention					DiD
194	153	153	Addenbrooke			330				1	1	1										Work place	Work place				Personalised travel advice, Travel information pack, Ongoing travel advice		3 months					DiD		Baseline car use	26.5
195	154	154	Council CarPark			281				1	1	1										Work place	Work place				Personalised travel advice, Travel information pack, Ongoing travel advice		3 months					DiD		percentage of individuals driving alone for five days a week	56.6
196	155	155	Council New Recruit			103				1	1	1										Work place	Work place				Personalised travel advice, Travel information pack, Ongoing travel advice		3 months					DiD		Baseline car use	45.5
197	156	156	Denver Experiment			748												1				Work place	Work place		work week		Introduction of compressed work week – four-day week – nine-day fortnight		Upto 12 months					before and after (without baseline #)
198	157	157	Florida State University carpooling experiment: Intervention car park A			45										1		1				Work place	Work place		carpool parking		(1) reserved car pool parking, (2) token reinforcers for car pool occupants, (3) a computer-generated match list of neighboring students interested in car pools.		1 month					before and after (without baseline #)
199	157	157	Florida State University carpooling experiment: Intervention car park B			45										1		1				Work place	Work place		carpool parking		(1) reserved car pool parking, (2) token reinforcers for car pool occupants, (3) a computer-generated match list of neighboring students interested in car pools.		1 month					before and after (without baseline #)
200	158	158	ecotravel coordinator program: participants	Coordinator		11	11	11			1											school	school		ecotravel coordinator program				2 months					DiD		Car Travel Mileage; Ecofriendly Mode Use	129	101.04									Ecofriendly Mode Use	15.73	179.6
201	158	158	ecotravel coordinator program: participants	Participant		27	27	27	1		1	1			1							school	school		ecotravel coordinator program				2 months					DiD		Car Travel Mileage; Ecofriendly Mode Use	176.54	124.91									Ecofriendly Mode Use	13.52	88.72
202	158	158	ecotravel coordinator program: participants	Request-Only		61	61	61	1		1											school	school						2 months					DiD		Car Travel Mileage; Ecofriendly Mode Use	142.11	195.26									Ecofriendly Mode Use	8.8	88.49
203	158	158	ecotravel coordinator program: participants	Nonparticipant		67	67	67														school	school						2 months					DiD		Car Travel Mileage; Ecofriendly Mode Use	176.29	149.5									Ecofriendly Mode Use	8.01	71.77
204	159	159	Stockholm obesity intervention	intervention		54			1			1						1		1		community-wide	community-wide						18 months- 52 weeks	February and March 2005				treatment-control	Self-report, intention-to-treat analysis	(CONTROL): mean proportion of participants using the bicycle at least once per week	38.3		80		8
205	159	159	Stockholm obesity intervention	control		54	60	54														community-wide	community-wide											treatment-control	Self-report, intention-to-treat analysis
206	159	159	Stockholm obesity intervention	intervention		54	60	54	1			1						1		1		community-wide	community-wide			(1) raising awareness (2) countering (substituting an unhealthy behaviour for a healthy behaviour, for example, cycling) and (3) helping relationships	2-armed design. moderate-intensity programme with physician meetings, physical activity prescriptions, group counselling and bicycles. The control group was a low-intensity group support programme with pedometers.		18 months- 52 weeks					DiD	Self-report, intention-to-treat analysis	(CONTROL): compliance with the cycling recommendation (Cycling target of >2km/day)					8.9		39.3
207	159	159	Stockholm obesity intervention	control		54	60	54	1			1	1					1				community-wide	community-wide						NA					DiD	Self-report, intention-to-treat analysis	Walking, steps per day					0		8249	2784
208	160	160	Pedometer-Based Intervention	control		46	60	46														community-wide	community-wide			self-monitoring, couseling. verbal reinforcement, individualized goal setting, and objective feedback	2-armed design. self-monitored physical activity using a pedometer, step calendar, walking safety sheet, 2 behavioral counseling and goal-setting sessions. control group: 2 generic physical activity information brochures		6 months					DiD		Control: 6 mo Total physical activity							257.1	(214.3), change = -40.4 (191.8)				355.2	(271.2), change = -12.1 (254.8)
209	160	160	Pedometer-Based Intervention	intervention		44	62	44			1	1	1									community-wide	community-wide			self-monitoring, couseling. verbal reinforcement, individualized goal setting, and objective feedback	2-armed design. self-monitored physical activity using a pedometer, step calendar, walking safety sheet, 2 behavioral counseling and goal-setting sessions. control group: 2 generic physical activity information brochures		6 months					DiD
210	166	166	Prestwich (Plan)			255							1									community-wide	community-wide											na
211	167	167	Prestwich (Goal)			149							1									community-wide	community-wide											na
212	168	168	Baker			79				1			1					1				community-wide	community-wide			Physical Activity History, Decisional Balance, Barriers, Goal-setting	pedometer, physical activity consultation, enhancing motivation, overcoming barriers and developing appropriate walking plans							na
213	169	169	Gilson (Routes)			70							1									community-wide	community-wide											na
214	170	170	Gilson (Tasks))			70												1				community-wide	community-wide											na
215	173	173	Pedometer trial	no-treatment control group		107	123	107														community-wide	community-wide			3-armed design. (1) self-help walking program (WP) and weekly diaries (sent by mail); (2) the same walking program with a pedometer (WPP) (also by mail); (3) no-treatment control group	self-help, pedometer		6 weeks					DiD		Mean Past week all purpose walking (sessions/week)							2.54	3.2
216	173	173	Pedometer trial	self-help walking program (WP) and weekly diaries (sent by mail);		102	123	102			1											community-wide	community-wide			3-armed design. (1) self-help walking program (WP) and weekly diaries (sent by mail); (2) the same walking program with a pedometer (WPP) (also by mail); (3) no-treatment control group	self-help, pedometer							DiD		Mean Past week all purpose walking (sessions/week)							2.8	3.71
217	173	173	Pedometer trial	same walking program with a pedometer (WPP) (also by mail);		105	123	105			1							1				community-wide	community-wide			3-armed design. (1) self-help walking program (WP) and weekly diaries (sent by mail); (2) the same walking program with a pedometer (WPP) (also by mail); (3) no-treatment control group	self-help, pedometer							DiD		Mean Past week all purpose walking (sessions/week)							2.36	2.19
218	173	173	Pedometer trial	no-treatment control group		107	123	107														community-wide	community-wide			3-armed design. (1) self-help walking program (WP) and weekly diaries (sent by mail); (2) the same walking program with a pedometer (WPP) (also by mail); (3) no-treatment control group	self-help, pedometer		6 weeks					DiD		Mean Past week all purpose walking (min/week)							69	84
219	173	173	Pedometer trial	self-help walking program (WP) and weekly diaries (sent by mail);		102	123	102			1											community-wide	community-wide			3-armed design. (1) self-help walking program (WP) and weekly diaries (sent by mail); (2) the same walking program with a pedometer (WPP) (also by mail); (3) no-treatment control group	self-help, pedometer							DiD		Mean Past week all purpose walking (min/week)							59	75
220	173	173	Pedometer trial	same walking program with a pedometer (WPP) (also by mail);		105	123	105			1							1				community-wide	community-wide			3-armed design. (1) self-help walking program (WP) and weekly diaries (sent by mail); (2) the same walking program with a pedometer (WPP) (also by mail); (3) no-treatment control group	self-help, pedometer							DiD		Mean Past week all purpose walking (min/week)							63	79
221	175	175	telephone counseling intervention	(1) intervention;		67		67					1									community-wide	community-wide			3-armed design. (1) intervention; (2) attention control; (3) no-attention control group	Goal setting, restructuring plans, and relapse prevention		24 months					DiD
222	175	175	telephone counseling intervention	(2) attention control;		60		60														community-wide	community-wide			3-armed design. (1) intervention; (2) attention control; (3) no-attention control group	Goal setting, restructuring plans, and relapse prevention							DiD (without baseline #)
223	175	175	telephone counseling intervention	(3) no-attention control group		70		70														community-wide	community-wide			3-armed design. (1) intervention; (2) attention control; (3) no-attention control group	Goal setting, restructuring plans, and relapse prevention		NA					DiD (without baseline #)
224	176	176	telephone to walk	TLC-ACT		41		41			1											community-wide	community-wide			2-armed design. TLC-ACT	Consequences, Intention formation, Instruction, Self-monitoring		12 weeks					DiD		Minutes per week walked at baseline (%)
225	176	176	telephone to walk	Control		44		44			1											community-wide	community-wide			2-armed design. TLC-ACT	Consequences, Intention formation, Instruction, Self-monitoring		NA					DiD		Minutes per week walked at baseline (%)
226	177	177	pedometers to increase physical activity: a pilot study	Pedometer		13	13	13				1	1									community-wide	community-wide			2-armed design. Pedometer, control	Health-behavior , Intention formation, Graded tasks, Goal setting, Self-monitoring, Feedback		12 weeks					DiD		Mean steps/day							6242	541
227	177	177	pedometers to increase physical activity: a pilot study	Control		13	13	13				1	1									community-wide	community-wide			2-armed design. Pedometer, control	Health-behavior , Intention formation, Graded tasks, Goal setting, Self-monitoring, Feedback		NA					DiD		Mean steps/day							6574	606
228	185	185	Brownson (2005)			1531			1			1										community-wide	community-wide				General encouragement, Feedback		4					na
229	186	186	Community-Based trial	Intervention		653		653	1			1										community-wide	community-wide				General encouragement, Feedback		4					treatment-control		CONTROL: 7-day total walking							97.2	85.0–109.5
230	186	186	Community-Based trial	Comparison		580		580	1			1										community-wide	community-wide				General encouragement, Feedback		4					treatment-control
231	187	187	Car-share			298								1								community-wide	community-wide						-					before and after		non-members (% mode)	24.5		30.4						45.6		City CarShare	0
232	188	188	Travelsmart suburbs Brisbane	pilot	54	NR			1	1	1											community-wide	community-wide				Health-behavior, General encouragement		6 months	2001-08-01				before and after		mode choice %	55		9		1		10				car as passenger	25
233	189	189	Socialdata (Perth)			2578			1				1									community-wide	community-wide			General encouragement			8 months
234	190	190	Socialdata (Melville)			3090			1		1		1									community-wide	community-wide			General encouragement			6 months
235	191	191	Sustrans (Lancashire)			2262			1		1											community-wide	community-wide			General encouragement			9 months
236	192	192	Sustrans (Nottingham)			2057			1		1		1									community-wide	community-wide			General encouragement			6 months
237	193	193	Sustrans (Sheffield)			1517			1		1		1									community-wide	community-wide			General encouragement			9 months
238	194	194	Sustrans (Gloucester)			1367			1		1		1									community-wide	community-wide			General encouragement			9 months
239	195	195	Sustrans (Bristol)			1360			1		1		1									community-wide	community-wide			General encouragement			9 months
240	196	196	Sustrans (Cramlington)			1061			1		1											community-wide	community-wide			General encouragement			9 months
241	197	197	Sustrans (Doncaster)			977			1	1	1											community-wide	community-wide			General encouragement, Others’ approval			6 months
242	198	198	Wilmink			2000			1		1											community-wide	community-wide			General encouragement			-
243	199	199	TAPESTRY			1299			1		1		1									community-wide	community-wide			General encouragement, Model/demonstrate behavior			12 months
244	200	200	York Intelligent Travel project	intervention		167			1	1	1	1										community-wide	community-wide						6 months					DiD		Distance per person (dpp)	303		27		16		11
245	200	200	York Intelligent Travel project	control		60																community-wide	community-wide						NA					DiD		Distance per person (dpp)	232		41		49		9
246	200	200	York Intelligent Travel project	intervention		167			1	1	1											community-wide	community-wide						6 months					DiD		Distance travelled (Km)	72067		1105		462		641
247	200	200	York Intelligent Travel project	control		60																community-wide	community-wide						NA					DiD		Distance travelled (Km)	17830		1359		685		323
248	200	200	York Intelligent Travel project	intervention		167			1	1	1											community-wide	community-wide						6 months					DiD		mode choice %	85		4		3		8
249	200	200	York Intelligent Travel project	control		60																community-wide	community-wide		personalised travel planning or individualised marketing	personalised travel planning or individualised marketing			NA					DiD		mode choice %	72		12		7		9
250	200	200	York Intelligent Travel project	intervention		167			1	1	1											community-wide	community-wide						6 months					DiD		Number of Users	232		41		26		64
251	200	200	York Intelligent Travel project	control		60																community-wide	community-wide		personalised travel planning or individualised marketing	personalised travel planning or individualised marketing			NA					DiD		Number of Users	77		33		14		18
252	203	203	City and County of San Francisco,																			building-based	building-based				new development travel plan							na
253	204	204	City and County of San Francisco,																			building-based	building-based				new development travel plan							na
254	206	206	De Gruyter, C. (2017)																			building-based	building-based				new development travel plan							na
255	210	210	Ho et al., 2017;																			building-based	building-based			Area-based travel planning	new development travel plan							na
256	211	211	Jollon, 2013;																			building-based	building-based				new development travel plan							na
257	212	212	MAX, 2007;																			building-based	building-based				new development travel plan							na
258	213	213	NSW Government, 2011;																			building-based	building-based				new development travel plan							na
259	214	214	Potter & Enoch, 2007;																			Residential	building-based				new development travel plan
260	218	218	Pasadena Towers Case Study (Stewart, 1994)	intervention		179																Residential	building-based		building-based transportation demand management (TDM) program	building-based transportation demand management (TDM) program	new development travel plan							treatment-control
261	218	218	Pasadena Towers Case Study (Stewart, 1994)	control		192																Residential	building-based				new development travel plan							treatment-control
262	219	219	UrbanTrans & Kimley Horn Associates, 2014;																			Residential	building-based				new development travel plan
263	223	223	Brighton Year 1			2000	1968	2000			1											individualized	individualized		personal travel planning			BHCC/SDG	1 year
264	224	224	Bristol: Bishopsworth 1			363	378	363	1		1											individualized	individualized		personal travel planning			Sustrans
265	226	226	Bristol: Hartcliffe			332	374	332			1	1						1				individualized	individualized		personal travel planning			Sustrans	1-2 months
266	227	227	Bristol: Bishopston			478	456	478														individualized	individualized		personal travel planning			Sustrans	2-3 months
267	228	228	Darlington Phase 1			1156	1237	1156			1											individualized	individualized		personal travel planning			SDG	3-4 months
268	229	229	Lancashire: South Ribble			634	IA	634														individualized	individualized		personal travel planning			SDG
269	230	230	Nottingham Lady Bay			450	601	450			1	1						1				individualized	individualized		personal travel planning			Sustrans	2-3 months
270	231	231	Nottingham Meadows			402	535	402			1	1						1				individualized	individualized		personal travel planning			Sustrans	2-3 months
271	232	232	Peterborough Phase 1			1228	1073	1228														individualized	individualized		personal travel planning			Sustrans	3-4 months
272	233	233	Worchester Phase 1			962	978	962			1	1						1				individualized	individualized		personal travel planning			Sustrans	3-4 months
273	234	234	Experimental Study Munich			288																individualized	individualized		personal travel planning									treatment-control	MANOVA
274	223	223	Brighton Year 1			2000	1968	2000			1											individualized	individualized		personal travel planning				1 year	2006-06-01	2006-10-01		IA	before and after (without baseline #)
275	224	224	Bristol: Bishopsworth 1			321	378	363	1		1											individualized	individualized		personal travel planning					Sept 2002			6	before and after (without baseline #)
276	225	225	Bristol: Bishopsworth 2			363																individualized	individualized		personal travel planning					Sept 2002			20	before and after (without baseline #)
277	226	226	Bristol: Hartcliffe			374	374	332			1	1						1				individualized	individualized		personal travel planning				1-2 months	Oct–2003	2003-11-01		6	before and after (without baseline #)
278	227	227	Bristol: Bishopston			456	456	478														individualized	individualized		personal travel planning				2-3 months	Apr– 2003	2003-06-01		9	before and after (without baseline #)
279	228	228	Darlington Phase 1			1237	1237	1156			1											individualized	individualized		personal travel planning				3-4 months	May–2005	2005-08-01		6	before and after (without baseline #)
280	229	229	Lancashire: South Ribble			634	IA	634														individualized	individualized		personal travel planning								8	before and after (without baseline #)
281	230	230	Nottingham Lady Bay			601	601	450			1	1						1				individualized	individualized		personal travel planning				2-3 months	Sep–2003	2003-11-01		7	before and after (without baseline #)
282	231	231	Nottingham Meadows			535	535	402			1	1						1				individualized	individualized		personal travel planning				2-3 months	Sep–2003	2003-11-01		7	before and after (without baseline #)
283	232	232	Peterborough Phase 1			1073	1073	1228														individualized	individualized		personal travel planning				3-4 months	Sep–2005	2005-12-01		6	before and after (without baseline #)
284	233	233	Worchester Phase 1			978	978	962			1	1						1				individualized	individualized		personal travel planning				3-4 months	Sep–2005	2005-12-01		6	before and after (without baseline #)
285	223	223	Brighton Year 1			2000					1											individualized	individualized		personal travel planning		SDG use travel advisors in short door-step conversation for: Characteristics of travel needs and behavior & key motivators.	To determine what types of message and information are likely to be relevant to that participant.	1 year	Jun–06	2006-10-01		IA	before and after		modeshare (%)	54				14		1				Car passenger	IA
286	224	224	Bristol: Bishopsworth 1			321			1		1											individualized	individualized		personal travel planning		participants are provided with a menu of information from which to select what they feel will be useful			Sept 2002			6	before and after		modeshare (%)	44		8		0		23				Car passenger	25
287	225	225	Bristol: Bishopsworth 2			363																individualized	individualized		personal travel planning					Sept 2002			20	before and after		modeshare (%)	45		11		0		20				Car passenger	23
288	226	226	Bristol: Hartcliffe			374	374	332			1	1						1				individualized	individualized		personal travel planning	PTP plus bus improvement			1-2 months	Oct–Nov 2003			6	before and after		modeshare (%)	45		12		1		20				Car passenger	21
289	227	227	Bristol: Bishopston			456	456	478														individualized	individualized		personal travel planning				2-3 months	Apr–Jun 2003	2003-06-01		9	before and after		modeshare (%)	37		5		4		38				Car passenger	15
290	228	228	Darlington Phase 1			1237	1237	1156			1											individualized	individualized		personal travel planning	SDG use travel advisors in short door-step conversation for: Characteristics of travel needs and behavior & key motivators.	To determine what types of message and information are likely to be relevant to that participant.		3-4 months	May–Aug 2005	2005-08-01		6	before and after		modeshare (%)	45		12		1		23				Car passenger	19
291	229	229	Lancashire: South Ribble			634	IA	634														individualized	individualized		personal travel planning								8	before and after		modeshare (%)	57		6		1		14				Car passenger	21
292	230	230	Nottingham Lady Bay			601	601	450			1	1						1				individualized	individualized		personal travel planning		PTP plus bus improvement		2-3 months	Sep–2003	2003-11-01		7	before and after		modeshare (%)	41		8		7		25				Car passenger	19
293	231	231	Nottingham Meadows			535	535	402			1	1						1				individualized	individualized		personal travel planning		PTP plus bus improvement		2-3 months	Sep–2003	2003-11-01		7	before and after		modeshare (%)	29		25		3		32				Car passenger	11
294	232	232	Peterborough Phase 1			1073	1073	1228														individualized	individualized		personal travel planning				3-4 months	Sep–2005	2005-12-01		6	before and after		modeshare (%)	20		7		5		43				Car passenger	25
295	233	233	Worchester Phase 1			978	978	962			1	1						1				individualized	individualized		personal travel planning		PTP plus Worcester Express bus improvement		3-4 months	Sep–2005	2005-12-01		6	before and after		modeshare (%)	NA		NA		NA		NA				Car passenger	NA
296	234	234	Experimental Study Munich			288				1	1					1						Residential	individualized, Residential		two-step individualized marketing approach	An individualized welcome letter + information brochure about local PT, cycling and walking; + a PT city map; and a ‘service card’ for additional information & one-week free PT pass								treatment-control	MANOVA, ANOVA	Control group: Modal-split-share (in %)	30.8	0.36	33.5	0.33	9.4	0.22	23.3	0.26			Car passenger	included in car
297	235	235	Sapporo			66			1		1											Residential	Residential			a. Motivation b. No plan c. Provide individualized information				1999				before and after (without baseline #)
298	236	236	Sapporo (Ainosato)			120			1		1											Residential	Residential			a. Motivation b. No plan c. Provide individualized information				2000				before and after (without baseline #)
299	237	237	Sapporo (Ebetsu)			349			1		1											Residential	Residential			a. Motivation b. No plan c. Provide individualized information				2000				before and after (without baseline #)
300	238	238	Takasaki City			91										1						Residential	Residential			a. Trial ticket				2000				na
301	239	239	Kanazawa			19			1		1											Residential	Residential			a. Motivation b. No plan c. Provide individualized information				2001				DiD (without baseline & control #)
302	240	240	Hitachi City			58					1											Residential	Residential			a. No plan b. Provide individualized information				2002				before and after (without baseline #)
303	241	241	Osaka City			106					1											Residential	Residential			a. No plan b. Provide individualized information				2001				before and after (without baseline #)
304	242	242	Suita City			422			1		1											Residential	Residential			a. Plan b. Customized travel information				2002				before and after (without baseline #)
305	243	243	Kawanishi- Inagawa area			312			1		1		1									Residential	Residential			a. Motivation b. Plan with goal setting c. Provide individualized information				2003				DiD (without baseline & control #)
306	244	244	Sapporo			50			1		1		1									Residential	Residential			a. Motivation b. Plan c. Provide individualized information				2003				DiD (without baseline & control #)
307	245	245	Mihara Town			NR			1	1		1										Residential	Residential			a. Motivation b. Provide group advice c. Integrated map				2003				before and after (without baseline #)
308	246	246	Suzuran-dai (Hyogo- Prefecture)			210			1	1			1									Residential	Residential			a. Motivation b. Plan with goal setting c. Provide non-individualized information				2004				DiD (without baseline & control #)
309	247	247	Miki City			48			1	1			1									Residential	Residential			a. Motivation b. Plan with goal setting c. Provide non-individualized information				2004				DiD (without baseline & control #)
310	248	248	Himeji City			103			1		1		1									Residential	Residential			a. Motivation b. Plan with goal setting c. Provide individualized information				2004				DiD (without baseline & control #)
311	249	249	Keihanshin area			1560			1	1			1									Residential	Residential			a. Motivation b. Plan with goal setting c. Provide non-individualized information				2004				DiD (without baseline & control #)
312	250	250	Obihiro City			410			1				1									Residential	Residential			a. Motivation b. plan				2004				treatment-control
313	251	251	Ryugasaki City			153			1		1		1									Residential	Residential			a. Motivation b. plan c. Provide individualized information				2005				DiD (without baseline & control #)
314	252	252	Kanazawa City (several workplaces)			106			1		1											Work place	Work place			a. Motivation b. No plan c. Provide individualized information				2001				before and after (without baseline #)
315	253	253	Toyonaka City (1 workplace)			79			1		1		1									Work place	Work place			a. Motivation b. plan c. Provide individualized information				2003				before and after (without baseline #)
316	254	254	Suita City (1 university)			133			1		1		1									Work place	Work place			a. Motivation b. Plan with goal setting c. Provide individualized information				2003				before and after (without baseline #)
317	255	255	Himeji City (3 workplaces)			99			1		1		1									Work place	Work place			a. Motivation b. plan c. Provide individualized information				2004				DiD (without baseline & control #)
318	256	256	Osaka Prefecture (several workplaces)			500			1		1											Work place	Work place			a. Motivation b. Plan with goal setting c. Provide individualized information				2004				DiD (without baseline & control #)
319	257	257	Sapporo			127			1		1											School	School			a. Motivation b. No plan c. Provide individualized information				2000				before and after (without baseline #)
320	258	258	Kanazawa			39			1		1											School	School			a. Motivation b. No plan c. Provide individualized information				2001				DiD (without baseline & control #)
321	259	259	Sapporo			292			1		1		1									School	School			a. Motivation b. Plan or individualized information c. Provide individualized information				2002				before and after (without baseline #)
322	260	260	Sapporo			97			1		1		1									School	School			a. Motivation b. Plan c. Provide individualized information				2002				before and after (without baseline #)
323	261	261	Kanazawa			71			1		1	1										School	School			a. No plan b. Coordinator c. Provide individualized information				2002				DiD (without baseline & control #)
324	262	262	Izumi City			135			1				1									School	School			a. Motivation b. Plan				2002				before and after (without baseline #)
325	263	263	Toyonaka			91			1				1									School	School			a. Motivation b. Plan				2003				before and after (without baseline #)
326	264	264	Fuji			164			1				1									School	School			a. Motivation b. Plan				2004				na
327	265	265	Hadano			81			1		1		1									School	School			a. Motivation b. Plan c. Provide individualized information				2005				before and after (without baseline #)
328	266	266	Armadale			562	247	562														Area-wide	Area-wide			IndiMark				2003-04				before and after (without baseline #)	Partial panel
329	266	266	Armadale			562	247	562														Area-wide	Area-wide			IndiMark				2003-04				before and after (without baseline #)	Partial panel
330	267	267	Bassendean			409	409	409														Area-wide	Area-wide			IndiMark				2006-07				before and after (without baseline #)	Random
331	267	267	Bassendean			409	409	409														Area-wide	Area-wide			IndiMark				2006-07				before and after (without baseline #)	Random
332	268	268	Belmont																			Area-wide	Area-wide			IndiMark								before and after (without baseline #)
333	268	268	Belmont																			Area-wide	Area-wide			IndiMark								before and after (without baseline #)
334	269	269	Cambridge, Aus			400	529	400			1											individualized	individualized			IndiMark				2001-02				before and after (without baseline #)	Panel
335	269	269	Cambridge, Aus			400	529	400			1											individualized	individualized			IndiMark				2001-02				before and after (without baseline #)	Panel
336	270	270	Canning			571	535	571														individualized	individualized			IndiMark				2006-07				before and after (without baseline #)	Random
337	270	270	Canning			571	535	571														individualized	individualized			IndiMark				2006-07				before and after (without baseline #)	Random
338	271	271	Gosnells (Thornlie)			17200																individualized	individualized			IndiMark				2006-07				before and after (without baseline #)
339	272	272	Claremont			508	661	508														individualized	individualized			IndiMark				2006-07				before and after (without baseline #)	Random
340	272	272	Claremont			508	661	508														individualized	individualized			IndiMark				2006-07				na	Random
341	273	273	Cottesloe			6300																individualized	individualized			IndiMark				2006-07				na	Random
342	274	274	Nedlands			14000																individualized	individualized			IndiMark				2006-07				na	Random
343	274	274	Claremont/Cottesloe/Nedlands	2007, 1st after		473		473														individualized	individualized			IndiMark				2006-07				before and after	Random	Pre-intervention, 2006 mode share %	58.8		4.6		2.4		13.8				Car passenger	20.2
344	274	274	Claremont/Cottesloe/Nedlands	2009, 2nd after		377		377														individualized	individualized			IndiMark				2006-07				before and after	Random	Pre-intervention, 2006 mode share %	58.8		4.6		2.4		13.8				Car passenger	20.2
345	275	275	Fremantle			615	476	615														individualized	individualized			IndiMark				2001-04				before and after (without baseline #)	Random
346	275	275	Fremantle			615	476	615														individualized	individualized			IndiMark				2001-04				before and after (without baseline #)	Random
347	276	276	Joondalup			373	382	373														individualized	individualized			IndiMark				2007-08				before and after (without baseline #)	Random
348	276	276	Joondalup			373	382	373														individualized	individualized			IndiMark				2007-08				before and after (without baseline #)	Random
349	277	277	Joondalup (Living Smart)			425	579	425														individualized	individualized			IndiMark				2007-09				before and after (without baseline #)	Random
350	277	277	Joondalup (Living Smart)			425	579	425														individualized	individualized			IndiMark				2007-09				before and after (without baseline #)	Random
351	278	278	Mandurah (Living Smart)			490	553	490														individualized	individualized			IndiMark				2008-10				before and after (without baseline #)	Random
352	278	278	Mandurah (Living Smart)			490	553	490														individualized	individualized			IndiMark				2008-10				before and after (without baseline #)	Random
353	279	279	Melville (East)			544	576	544														individualized	individualized			IndiMark				2007-08				before and after (without baseline #)	Random
354	279	279	Melville (East)			544	576	544														individualized	individualized			IndiMark				2007-08				before and after (without baseline #)	Random
355	280	280	Melville (West)			634	972	634														individualized	individualized			IndiMark				2000-03				before and after (without baseline #)	Random
356	280	280	Melville (West)			634	972	634														individualized	individualized			IndiMark				2000-03				before and after (without baseline #)	Random
357	281	281	Perth City			574	670	574														individualized	individualized			IndiMark				2006-07				before and after (without baseline #)	Random
358	281	281	Perth City			574	670	574														individualized	individualized			IndiMark				2006-07				before and after (without baseline #)	Random
359	282	282	Stirling																			individualized	individualized			IndiMark				2006-07				na
360	283	283	Vincent																			individualized	individualized			IndiMark				2006-07				na
361	283	283	Perth/Stirling/Vincent	2007, 1st after		574	670	574														individualized	individualized			IndiMark				2006-07				before and after	Random	2006 mode share (pre intervention)	58		6		2		14				Car passenger	20.8
362	283	283	Perth/Stirling/Vincent	2011, 2nd after		574	670	574														individualized	individualized			IndiMark				2006-07				before and after	Random	2006 mode share (pre intervention)	58		6		2		14				Car passenger	20.8
363	284	284	Rockingham			420	562	420														individualized	individualized			IndiMark				2007-08				DiD (without baseline & control #)	Panel
364	284	284	Rockingham			420	562	420														individualized	individualized			IndiMark				2007-08				DiD (without baseline & control #)	Panel
365	285	285	South Perth: pilot			1118																Residential	Area, residential-based			IndiMark				1997				DiD (without baseline & control #)	travel diary evaluations,
366	285	285	South Perth	long-term; 2000 mode share, 1st year after		706		706														individualized	individualized			IndiMark				1997–2000				DiD (without control #)	travel diary evaluations,	1997 mode share (pre intervention)	60		6		2		12				Car passenger	20
367	285	285	South Perth	long-term; 2004 mode share; 4 years after		531		531														individualized	individualized			IndiMark				1997–2000				DiD (without control #)	travel diary evaluations,	1997 mode share (pre intervention)	60		6		2		12				Car passenger	20
368	286	286	Subiaco			400	310	400														individualized	individualized			IndiMark				1998-2003				before and after (without baseline #)	Random
369	286	286	Subiaco			400	310	400														individualized	individualized			IndiMark				1998-2003				before and after (without baseline #)	Random
370	287	287	Swan			409	409	409														individualized	individualized			IndiMark				2006-07				before and after (without baseline #)	Random
371	287	287	Swan			409	409	409														individualized	individualized			IndiMark				2006-07				before and after (without baseline #)	Random
372	288	288	Victoria Park			391	454	391														individualized	individualized			IndiMark				2006-07				before and after (without baseline #)	Random & panel
373	288	288	Victoria Park			391	454	391														individualized	individualized			IndiMark				2006-07				before and after (without baseline #)	Random & panel
374	289	289	Wanneroo (Clarkson)			409	580	409														individualized	individualized			IndiMark				2005-06				before and after (without baseline #)	Panel
375	289	289	Wanneroo (Clarkson)			409	580	409														individualized	individualized			IndiMark				2005-06				before and after (without baseline #)	Panel
376	290	290	Wanneroo (Marangaroo)		11	201	300	201														individualized	individualized			IndiMark				2002-03				before and after (without baseline #)	Panel
377	290	290	Wanneroo (Marangaroo)		11	201	300	201														individualized	individualized			IndiMark				2002-03				before and after (without baseline #)	Panel
378	291	291	Adelaide pilot			350					1	1										Residential	Residential		Travel Blending	pilot project	IndiMark Australian pilot project							before and after (without baseline #)	seven-day travel diaries
379	291	291	Adelaide pilot			1000					1	1										Residential	Residential		Travel Blending	pilot project								before and after (without baseline #)	seven-day travel diaries
380	292	292	Adelaide – Christies Beach			1000					1	1										Residential	Residential		Travel Blending	pilot project	IndiMark Australian pilot project							na
381	293	293	Adelaide – Dulwich		4	600					1	1										Residential	Residential		Travel Blending	pilot project	IndiMark Australian pilot project							na
382	294	294	Brisbane – Holland Park (Qld)			600					1	1										Residential	Residential		Travel Blending	pilot project	IndiMark Australian pilot project							na
383	295	295	Redland			2357	2357	2831														Area-wide	Area-wide		Voluntary Travel Behaviour Change IndiMark	Voluntary Travel Behaviour Change IndiMark				2004				DiD (without baseline & control #)	Random
384	295	295	Redland			2357	2357	2831														Area-wide	Area-wide		Voluntary Travel Behaviour Change IndiMark	Voluntary Travel Behaviour Change IndiMark				2004				DiD (without baseline & control #)	Random
385	296	296	Brisbane (North)			1309	1309	1381			1											Area-wide	Area-wide		TravelSmart project		IndiMark							DiD (without baseline & control #)	Random & panel
386	296	296	Brisbane (North)			1309	1309	1381			1											Area-wide	Area-wide		TravelSmart project		IndiMark							DiD (without baseline & control #)	Random & panel
387	297	297	Brisbane (South)																			Area-wide	Area-wide		TravelSmart project									na
388	298	298	Gold Coast								1		1	1				1		1					TravelBlending		TravelBlending embedded within an intervention called Living Neighbourhoods was applied on the Gold Coast							na
389	299	299	Sunshine Coast																								A further intervention was applied by UrbanTrans on the Sunshine Coast.
390	300	300	South Perth (WA)			865														1		Residential	Residential			IndiMark	IndiMark Australian pilot project			1997				before and after (without baseline #)
391	301	301	Grange (Qld)			987														1		Residential	Residential			IndiMark	IndiMark Australian pilot project			2001				before and after (without baseline #)
392	301	301	Grange (Qld)			987																Residential	Residential			IndiMark				2001				before and after (without baseline #)
393	302	302	Townsville (Qld)			580														1		Residential	Residential			IndiMark	IndiMark Australian pilot project			2003				before and after (without baseline #)
394	302	302	Townsville (Qld)			580																Residential	Residential			IndiMark				2003				before and after (without baseline #)
395	303	30310	occupational health care units (OHC) intervention	STEP		123				1								1				Work place	Work place			STEP	2-arm design. one group meeting, log-monitored pedometer-use and six e-mail messages from OHC		24 weeks; 6-month			1 contact per 2 weeks		DiD	Logistic regression, Generalized Linear Mixed Models (GLMM)	Walking at work, Weekly minutes							144	209	521	468
396	303	30310	occupational health care units (OHC) intervention	COMP		118																Work place	Work place											DiD		Walking at work, Weekly minutes							157	236
397	303	30302	occupational health care units (OHC) intervention	STEP		123				1								1				Work place	Work place			STEP	2-arm design. one group meeting, log-monitored pedometer-use and six e-mail messages from OHC		24 weeks			1 contact per 2 weeks		DiD		Weekly minutes, mean (SD); Total walking							370	311
398	303	30302	occupational health care units (OHC) intervention	COMP		118																Work place	Work place											DiD		Weekly minutes, mean (SD); Total walking							400	401
399	304	304	implementation intentions intervention: rural area	treatment		208							1									community-wide	community-wide		Implementation Intention		2-arm design. Implementation Intention. 1 time intervention		1 time	November	December	1 contact per 4 weeks		DiD	ANOVAs	Single-occupancy car use	9.61	8.67
400	304	304	implementation intentions intervention: rural area	control		207																community-wide	community-wide		Implementation Intention		2-arm design. Implementation Intention. 1 time intervention		NA					DiD		Single-occupancy car use	11.67	13.62
401	305	305	Residential relocation intervention	treatment		118					1					1						community-wide	community-wide				2-arm design. Free public transportation ticket and personal schedule information		6 weeks			1 contact per 6 weeks		DiD		mode % (fraction)	50	50	18	39
402	305	305	Residential relocation intervention	control		123					1					1						community-wide	community-wide				2-arm design. Free public transportation ticket and personal schedule information		NA					DiD		mode % (fraction)	50	50	18	39
403	306	306	self-regulated behavioral change intervention: Stage-based dialog campaign	control		118																community-wide	community-wide						NA					treatment-control	regression analyses, RCT	CONTROL	7.13	2.7	5.37	2.66	4.75	2.91	8.4	2.14
404	306	306	self-regulated behavioral change intervention: Stage-based dialog campaign	Dialog marketing		68					1											community-wide	community-wide			Dialog, phone-based dialog marketing campaign. Personlized talk. stage diagnosis & stage-specific intervention modules	3-arm design (1) control group; (2) experimental group participating in the phone-based dialog marketing campaign; (3) experimental group receiving only a standardized information package without a personal talk		2 weeks			2 contacts per week		treatment-control	regression analyses, MANCOVA	CONTROL	7.13	2.7	5.37	2.66	4.75	2.91	8.4	2.14
405	306	306	self-regulated behavioral change intervention: standardized information	Info. Package		105			1	1												community-wide	community-wide			Standardised information package. brochures/leaflets to promote the use of non-motor-car transportation means. information about PT use, bike and walking trails, and motor-carsharing services	3-arm design (1) control group; (2) experimental group participating in the phone-based dialog marketing campaign; (3) experimental group receiving only a standardized information package without a personal talk		1 weeks			1 contact per week		treatment-control	regression analyses	CONTROL	7.13	2.7	5.37	2.66	4.75	2.91	8.4	2.14
406	30801	308	rush-hour avoidance intervention: Yeti	Yeti		109										1						community-wide	community-wide		Noin-monetary rewards		2-arm design. Self-selected into 2 different reward schemes. (1) Monetary rewards; (2) credits towards keeping a Smartphone		11 weeks			1 contact per week		DiD	mixed logistic regression (MLR) model
407	30802	308	rush-hour avoidance intervention: Monetary	Monetary		232										1						community-wide	community-wide		Monetary		2-arm design. Self-selected into 2 different reward schemes. (1) Monetary rewards; (2) credits towards keeping a Smartphone		10 weeks			1 contact per week		DiD	mixed logistic regression (MLR) model
408	310	310	Sweden car use reduction intervention	treatment		24	28	24				1	1									community-wide	community-wide			home-visit prospective car diary for the next-coming week, and possibilities to reduce car use were discussed. second car diary was filled in by both the experimental group and the control group reflecting car use after the intervention.	2-arm design. Control, home-visit		1 weeks	April-August, 2006		1 contact per week		DiD	Pre/post-intervention questionnaire, prospective car diary		14.6	-10.6									Number of trips as passenger	2.2	3.9
409	310	310	Sweden car use reduction intervention	control		33	34	33					1									community-wide	community-wide						NA					DiD	Pre/post-intervention questionnaire, prospective car diary		14.6	9.3									Number of trips as passenger	2.2	4.2
410	31101	311	Sapporo city school intervention: planning group	planning group		137					1		1									community-wide	community-wide			travel feedback program, behavioral plans with respect to methods of reducing car-use, CO2 emission from car-use info	2-arm design. advice group, planning group		1 weeks	September	November	1 contact per week		before and after	3-day activity-travel diary, questionnaire	Estimated total duration of car trips over 3 days (min) (3 days before)	144.63	137.73
411	31102	311	Sapporo city school intervention: Advice	Advice		155					1	1										community-wide	community-wide			individualized information and advice on reducing family car-use, CO2 emission from car-use info	2-arm design. advice group, planning group		1 weeks	September	November	1 contact per week		before and after	3-day activity-travel diary, questionnaire	Estimated total duration of car trips over 3 days (min) (3 days before)	115.54	201.27
412	31101	31102	Sapporo city school intervention: planning group	planning group		137							1									community-wide	community-wide			travel feedback program, behavioral plans with respect to methods of reducing car-use, CO2 emission from car-use info	2-arm design. advice group, planning group		1 weeks	September	November	1 contact per week		before and after	3-day activity-travel diary, questionnaire	Number of days of car-use during the month	19.75	10.9									Frequency of car trips 3 days (3 days before)	4.81	3.83
413	31102	31102	Sapporo city school intervention: Advice	Advice		155					1	1										community-wide	community-wide			individualized information and advice on reducing family car-use, CO2 emission from car-use info	2-arm design. advice group, planning group		1 weeks	September	November	1 contact per week		before and after	3-day activity-travel diary, questionnaire	Number of days of car-use during the month	17										Frequency of car trips 3 days (3 days before)	3.86	3.48
414	313	313	Umea awareness experiment	Experimental		66					1											community-wide	community-wide			more deliberate choice of travel mode was induced,	2-arm design. Control, awareness intervention		one time (intervention). Whole experiment 4 weeks	1999-10-01	1999-12-01	2 contacts per week		DiD	7-day travel diaries and questionnaires	self-reported past car use (SRC) (Scale ranging from: 1 to 5 (1 = never, 2 = 1–3/month, 3 = 1–2/week, 4 = 3–4/week, 5 = ≥ 5 /week).	0.61
415	313	313	Umea awareness experiment	Control		54																community-wide	community-wide			more deliberate choice of travel mode was induced,	2-arm design. Control, awareness intervention		NA					DiD	7-day travel diaries and questionnaires	self-reported past car use (SRC) (Scale ranging from: 1 to 5 (1 = never, 2 = 1–3/month, 3 = 1–2/week, 4 = 3–4/week, 5 = ≥ 5 /week).	0.5
416	314	314	Göteborg car reduction experiment	Control		40										1						community-wide	community-wide			2 week per kilometer fee,	4-arm design. Control, Charge, Charge + plan, Extend charge + plan		NA					DiD		Weekly trip frequency (Before treatment)	27.9	13.2
417	31401	314	Göteborg car reduction experiment: charge	Charge		40										1						community-wide	community-wide			2 week per kilometer fee,	4-arm design. Control, Charge, Charge + plan, Extend charge + plan		2 weeks			1 contact per week		DiD		Weekly trip frequency (Before treatment)	24.5	11.9
418	31402	314	Göteborg car reduction experiment: Charge + plan	Charge+plan		40																community-wide	community-wide			2 week long per kilometer fee, prospective car log (plan) for the following week	4-arm design. Control, Charge, Charge + plan, Extend charge + plan		2 weeks			1 contact per week		DiD		Weekly trip frequency (Before treatment)	32.5	19.3
419	31403	314	Göteborg car reduction experiment: Extend charge + plan	Extend charge + plan		40								1		1						community-wide	community-wide			4 week long per kilometer fee, prospective car log (plan) for the following week	4-arm design. Control, Charge, Charge + plan, Extend charge + plan		2 weeks			1 contact per 2 weeks		DiD		Weekly trip frequency (Before treatment)	33.6	16.9
420	31401	31402	Göteborg car reduction experiment	Control		40																community-wide	community-wide			2 week per kilometer fee,	4-arm design. Control, Charge, Charge + plan, Extend charge + plan		NA					DiD		Weekly driving distance (km) (Before treatment)	321	207
421	31401	31402	Göteborg car reduction experiment: charge	Charge		40										1						community-wide	community-wide		monetary	2 week per kilometer fee,	4-arm design. Control, Charge, Charge + plan, Extend charge + plan		2 weeks			1 contact per week		DiD		Weekly driving distance (km) (Before treatment)	306	177
422	31402	31402	Göteborg car reduction experiment: Charge + plan	Charge+plan		40							1			1						community-wide	community-wide		monetary, plan	2 week long per kilometer fee, prospective car log (plan) for the following week	4-arm design. Control, Charge, Charge + plan, Extend charge + plan		2 weeks			1 contact per week		DiD		Weekly driving distance (km) (Before treatment)	291	194
423	31403	31402	Göteborg car reduction experiment: Extend charge + plan	Extend charge + plan		40							1			1						community-wide	community-wide		monetary, plan	4 week long per kilometer fee, prospective car log (plan) for the following week	4-arm design. Control, Charge, Charge + plan, Extend charge + plan		4 weeks			1 contact per 2 weeks		DiD		Weekly driving distance (km) (Before treatment)	311	194
424	31701	317	Bochum and Dortmund experiment:	Commitment + free ticket		130		130					1			1						community-wide	community-wide			soft intervention, free ticket	4-arm design. Commitment preceded by a free ticket, commitment only, free ticket only, and control		4 weeks			1 contact per week		na
425	31702	317	Bochum and Dortmund experiment:	Free ticket		53		53								1						community-wide	community-wide			soft intervention, free ticket	4-arm design. Commitment preceded by a free ticket, commitment only, free ticket only, and control		4 weeks			1 contact per week		na
426	31703	317	Bochum and Dortmund experiment:	Commitment		61		61					1									community-wide	community-wide			soft intervention, free ticket	4-arm design. Commitment preceded by a free ticket, commitment only, free ticket only, and control		4 weeks			1 contact per week		na
427	320	320	Mutrie 2002																			community-wide	community-wide						24 weeks			1 contact per 24 weeks		na
428	32101	321	Gouda experiment	Environmental information		350			1				1									community-wide	community-wide		Self-monitoring, Environmental information		2x2 (Self-monitoring, environmental & financial information) factorial 5-arm design. Information on the environmental costs (E), Information on financial costs (C), Information on environmental & financial costs (E), No information (N), control condition (CC)		8 weeks			1 contact per 2 weeks		before and after		mean amounts of kilometres travelled two-week periods: Period 1	359
429	32102	321	Gouda experiment	Cost information		350				1												community-wide	community-wide		Self-monitoring, Cost information		2x2 (Self-monitoring, environmental & financial information) factorial 5-arm design. Information on the environmental costs (E), Information on financial costs (C), Information on environmental & financial costs (E), No information (N), control condition (CC)		8 weeks			1 contact per 2 weeks		before and after		mean amounts of kilometres travelled two-week periods: Period 1	367
430	32103	321	Gouda experiment	Environment + Cost information		350			1	1												community-wide	community-wide		Self-monitoring, Environment + Cost information		2x2 (Self-monitoring, environmental & financial information) factorial 5-arm design. Information on the environmental costs (E), Information on financial costs (C), Information on environmental & financial costs (E), No information (N), control condition (CC)		8 weeks			1 contact per 2 weeks		before and after		mean amounts of kilometres travelled two-week periods: Period 1	410
431	32104	321	Gouda experiment	Self-monitoring, No information		350							1									community-wide	community-wide		Self-monitoring, No information		2x2 (Self-monitoring, environmental & financial information) factorial 5-arm design. Information on the environmental costs (E), Information on financial costs (C), Information on environmental & financial costs (E), No information (N), control condition (CC)		1 weeks			1 contact per week		before and after		mean amounts of kilometres travelled two-week periods: Period 1	357
432	32501	32501	Copenhagen experiment: Free travelcard	Control		224																community-wide	community-wide		Free travelcard		5-arm design. Free travelcard, Customised Timetable, Free travelcard + customised timetable, Plan, Free travelcard + plan.		na					DiD		Commuting by PT (0-10 scale)	4.68		0.74
433	32502	32501	Copenhagen experiment: Free travelcard	Free travelcard		373										1						community-wide	community-wide		Free travelcard		5-arm design. Free travelcard, Customised Timetable, Free travelcard + customised timetable, Plan, Free travelcard + plan.		12 weeks					DiD		Commuting by PT (0-10 scale)	4.72		0.5
434	32501	32502	Copenhagen experiment: Free travelcard	Control		224																community-wide	community-wide		Free travelcard		5-arm design. Free travelcard, Customised Timetable, Free travelcard + customised timetable, Plan, Free travelcard + plan.		na					DiD		Commuting by PT (0-10 scale)			0.74
435	32501	32502	Copenhagen experiment: Free travelcard	Free travelcard		373										1						community-wide	community-wide		Free travelcard		5-arm design. Free travelcard, Customised Timetable, Free travelcard + customised timetable, Plan, Free travelcard + plan.		12 weeks					DiD		Commuting by PT (0-10 scale)			0.5
436	32502	325	Copenhagen experiment: Customised Timetable	Customised Timetable		597				1												community-wide	community-wide		Customised Timetable				12 weeks	October and November 2002	2003-04-01	1 contact per 8 weeks		na
437	32503	325	Copenhagen experiment: Free travelcard + customised timetable	Free travelcard + customised timetable		597				1						1						community-wide	community-wide		Free travelcard + customised timetable				12 weeks	October and November 2002	2003-04-01	1 contact per 8 weeks		na
438	32504	325	Copenhagen experiment: Plan	Plan		597							1									community-wide	community-wide		Plan				12 weeks	October and November 2002	2003-04-01	1 contact per 8 weeks		na
439	32505	325	Copenhagen experiment: Free travelcard + plan	Free travelcard + plan		597							1			1						community-wide	community-wide		Free travelcard + plan				12 weeks	October and November 2002	2003-04-01	1 contact per 8 weeks		na
442	33201	332	Cooper, 2007;	Madison-Miller		287			1						1							community-wide	community-wide		Community-Based Social Marketing				10 weeks	2004-05-01	2004-08-01			before and after (without baseline #)
443	33202	332	Cooper, 2007;	Lake Forest Park		346			1						1							community-wide	community-wide		Community-Based Social Marketing				14 weeks					before and after (without baseline #)
444	33203	332	Cooper, 2007;	Columbia City		296			1						1							community-wide	community-wide		Community-Based Social Marketing				10 weeks					before and after (without baseline #)
445	33204	332	Cooper, 2007;	Crossroads		290			1						1							community-wide	community-wide		Community-Based Social Marketing				12 weeks	2005-09-01	mid-November 2005			before and after (without baseline #)
450	337	337	South Perth TravelSmart, 1997							1				1											PT marketing		Bus Marketing and Passenger Information Measures							before and after		PT mode share %			6
451	338	338	Met Bus Information and marketing Campaign							1				1											PT marketing		Bus Marketing and Passenger Information Measures							before and after (without baseline #)
452	339	339	Melbourne Tram and Info Marketing Campaign , 1997							1				1											PT marketing		Bus Marketing and Passenger Information Measures							before and after (without baseline #)
453	340	340	Office (6 sites)																			Work place	Work place		work travel plan									na
454	340	340	Office (6 sites)																			Work place	Work place		work travel plan									na
455	341	341	Office (1 site)			32																Work place	Work place		work travel plan									before and after		Steps/day; non-car (comparison)	10						6802	3212			Transportation PA: Walking	105	1680
456	342	342	Office (1 site)			32																Work place	Work place		work travel plan				12 weeks	August 2006 and December 2006				before and after	2-way mixed factorial analyses and Mann Whitney and Wilcoxon tests	Steps/day							6924	3201			Transportation PA: Walking	80	1680
457	343	343	Employment (20 sites)a																			Work place	Work place
458	344	344	Residential (16 sites): Arlington			1416				1								1				Residential	Residential		TDM services		parking and TDM policies and programs			between 2010 and 2012				before and after		Percent of weekly commute trips (all Arlington residents)	54		27						8		Drive/ride with others	5
459	344	344	Residential (16 sites): Arlington			1416				1								1				Residential	Residential		TDM services		parking and TDM policies and programs			between 2010 and 2012				before and after		Percent of weekly commute trips (TAZs in HH Travel Survey)	51		32						6		Drive/ride with others	9
460	344	344	Residential (16 sites): Arlington			1416				1								1				Residential	Residential		TDM services		parking and TDM policies and programs			between 2010 and 2012				before and after		Percent of non-work trips (2009 all Arlington residents) (Daily Non-work Trip)	40		8						16		Drive/ride with others	36
461	344	344	Residential (16 sites): Arlington			1416				1								1				Residential	Residential		TDM services		parking and TDM policies and programs			between 2010 and 2012				before and after		Percent of non-work trips (TAZs in HH Travel Survey) (Typical day non-work trips)	30		6						27		Drive/ride with others	33
462	345	345	Residential (8 sites)																			Residential	Residential											before and after		Car ownership of vehicles/household (control: surrounding suburbs)	2
463	34402		Beddington Zero Energy Development (BedZED), South London, UK																			Residential	Residential											na
464	34403		Poole Quarter, Poole, UK																			Work place	Work place											na
465	34404		Newcastle Great Park, Newcastle upon Tyne, UK																															na
466	34405		Queen Elizabeth Park, Guildford																			Residential	Residential											na
467	34406		30 residential and mixeduse developments in Melbourne, Australia																			Residential	Residential											na
468	34407		Rouse Hill, New South Wales, Australia																			Area-wide	Area-wide											na		Car ownership veh/household	1.6
469	346	346	Residential (4 sites)			296																Residential	Residential											before and after		Average Transport Mode Shares (Control Site) (Average Weekday 7–9 a.m.)	36.6				5.2		52.3				Car passenger	4.2
470	346	346	Residential (4 sites)			296																Residential	Residential											before and after		Average Transport Mode Shares (Control Site) (Saturday 10 a.m.–1 p.m.)	30.7				1.1		53.8				Car passenger	11.2
471	34601	346	Residential (4 sites) :Case–Control 1 (CC1)			242		242		1						1		1	1			Residential	Residential				Bicycle fleet (20 bicycles) On-site car-sharing vehicle with free membership New-resident kit containing local transport information Free weekly public transport ticket Transport information on building website Online forum for organizing carpooling Umbrellas at lobby to encourage walking			March to May 2014				na		Average Transport Mode Shares (Control Site) (Average Weekday 7–9 a.m.)											Car passenger
472	34602	347	Residential (4 sites) : Case–Control 2 (CC2)			282		282		1						1		1				Residential	Residential				3 on-site car-sharing vehicles with free membership Transport information on building website Free membership to Melbourne Bike Share			March to May 2014				na		Average Transport Mode Shares (Control Site) (Average Weekday 7–9 a.m.)
473	34603	348	Residential (4 sites) : Case–Control 3 (CC3)			124		124		1						1		1	1			Residential	Residential				Additional on-site bicycle parking Reduction in on-site car parking New-resident kit containing local transport information Free weekly public transport ticket Free membership to car-sharing service Transport information display in lobby			March to May 2014				na		Average Transport Mode Shares (Control Site) (Average Weekday 7–9 a.m.)
474	34604	349	Residential (4 sites) : Case–Control 4 (CC4)			24		24		1						1		1				Residential	Residential				Additional on-site bicycle parking No on-site car parking Car-sharing vehicle with free membership 12 h free use of car-sharing service per Resident After-ride shower facilities adjacent to bicycle parking Building users guide containing transport information			March to May 2014				na		Average Transport Mode Shares (Control Site) (Average Weekday 7–9 a.m.)
475	350	350	Residential (1 site)																															na
476	351	351	hospital travel plan (1 site)	2012		904	804	904	1	1	1	1		1		1		1	1	1		Work place	Work place		workplace travel plan		policy (e.g. completing a parking management study to inform a new parking policy, public transport ticket salary deduction/sacrifice schemes), infrastructure (e.g. provision of end of trip facilities, marking of carpooling spaces in staff car park) and behaviour change (e.g. cycling and walking programs).		3 year	2011	2014			before and after		Travel mode (%)-2011	83		11						4		others	2
477	351	351	hospital travel plan (1 site)	2013		872	804	872	1	1	1	1		1		1		1	1	1		Work place	Work place		workplace travel plan. Liverpool Hospital Travel Plan 2011-2014		assessment of organisational barriers and enablers to travel planning, auditing of the transport to and physical environment of the hospital, a staff survey, analysis of distances staff travel to work and interviews with hospital managers		3 year	2011	2014			before and after		Travel mode (%)-2011	83		11						4		others	2
478	351	351	hospital travel plan (1 site)	2014		682	804	682														Work place	Work place		workplace travel plan. Liverpool Hospital Travel Plan 2011-2014		assessment of organisational barriers and enablers to travel planning, auditing of the transport to and physical environment of the hospital, a staff survey, analysis of distances staff travel to work and interviews with hospital managers		3 year	2011	2014			before and after		Travel mode (%)-2011	83		11						4		others	2
479	35201	352	Hospital (2 sites): Queen Elizabeth II Medical Centre	Queen Elizabeth II Medical Centre		1041	650	1041								1		1				Work place	Work place				provision of an off-site park and ride facility information to staff via a TravelSmart junction, TravelSmart inductions for new staff, a car pool management system including parking discounts a matching service and e-bikes							before and after		Travel mode (%)- 2006	85		6						4		Car passenger	3
480	35202	352	Hospital (2 sites): Hollywood Private Hospital	Hollywood Private Hospital		445	173	445		1						1		1				Work place	Work place				awareness raising of transport alternatives, fleet fuel reduction targets, guaranteed ride home service for carpoolers, secure and non-secure bicycle parking, pool loan bicycles and transport access guides							before and after		Travel mode (%)- 2006	80		8						5		Car passenger	7
481	359	359	Merom et al., 2005	New South Wales Metropolitan		192			1					1								Work place	Work place		Walk to Work day	Walk to Work day	distributing promotional goods, promoting community awareness and organizing local activities			September 15, 2003				before and after		Proportion (%) by Using Each Travel Model	68.2		17.2						5.2		PT and walk	9.4
482	359	359	Merom et al., 2005	Other Metropolitan: control		318																Work place	Work place											before and after		Proportion (%) by Using Each Travel Model	72.6		6.6						6.6		PT and walk	14.2
483	360	360	Brockman and Fox, 2011			2292	2292							1		1		1		1		Work place	Work place		car-sharing scheme	a subsidized bicycle purchase scheme, a car-sharing scheme and public transport measures	Transport Plan: heavily limiting parking spaces and conditions for permits, increased parking charges, improving changing facilities for walkers and cyclists, new secure cycle storage, a subsidised cycle purchase scheme, a car-sharing scheme, a free university bus service which served local train and bus stations, and discounted season tickets on buses			2000-08-01				before and after		Travel mode (%)- 1998	50				7		19				others	24
[truncated: 418 more rows]
[truncated: 51 more columns]
