# Supplementary material for: Behavioural interventions change individual transport choices but have a limited impact on transport mode split. Evidence from a systematic review
Source: Research Square preprint supplement (doi:10.21203/rs.3.rs-2084989/v1), 2022-11-02
Supplement: Supplementary file 2 [file 58fc21bf2b26a0e73e8dc6fd.xlsx]

## Sheet: review papers
#	Article name		Ref	y.o.p	Authors	Lit review type (based on Haddaway & Macura 2018)	Travel behavior or Mode type (if specified)	settings qualifications	article type	Data bases searched	search criteia	Search date/period covered	Search terms included (yes or no; #)	key table or figure	papers included in the review		Study description	Intervention description		Selection	comprehensiveness	Protocol & transparency	Quantiative or qualitative	Outcome reporting	Meta-analysis	Critical analysis
1	Shifting from car to active transport: A systematic review of the effectiveness of interventions	Yes	Scheepers, C. E., Wendel-Vos, G. C. W., Den Broeder, J. M., Van Kempen, E. E. M. M., Van Wesemael, P. J. V., & Schuit, A. J. (2014). Shifting from car to active transport: a systematic review of the effectiveness of interventions. Transportation research part A: policy and practice, 70, 264-280.	2014	Scheepers, C. E., Wendel-Vos, G. C. W., Den Broeder, J. M., Van Kempen, E. E. M. M., Van Wesemael, P. J. V., & Schuit, A. J.	systematic review	active travel		transport journal	5 electronic databases (Medline, Embase, SciSearch, Social SciSearch, PsycInfo)	academic papers only	until 18 March 2014.	yes	Table 1, 2, 3	19		1	1		1	0	1	Qualitative	0	0	0
2	What works to promote walking at the population level? A systematic review	Yes	Foster, C., Kelly, P., Reid, H. A., Roberts, N., Murtagh, E. M., Humphreys, D. K., ... & Milton, K. (2018). What works to promote walking at the population level? A systematic review. British journal of sports medicine, 52(12), 807-812.	2018	Foster, C., Kelly, P., Reid, H. A., Roberts, N., Murtagh, E. M., Humphreys, D. K., ... & Milton, K.	systematic review	walking		medicine journal	10 databases: Cochrane Database of Systematic Reviews, Cochrane Central Register of Controlled Trials, MEDLINE, PubMed, EMBASE, DARE, Science Citation Index, Social Science Citations, SPORTDiscus, PsycINFO		January 1990 and March 2017	yes	Table 1, 2, 3. Figure 1	12		1	1		1	1	1	Quantiative	1	0	1
3	Do Interventions to Increase Walking Work? A Systematic Review of Interventions in Children and Adolescents	Yes	Carlin, A., Murphy, M. H., & Gallagher, A. M. (2016). Do interventions to increase walking work? A systematic review of interventions in children and adolescents. Sports Medicine, 46(4), 515-530.	2016	Carlin, A., Murphy, M. H., & Gallagher, A. M.	systematic review	walking		medicine journal	CINAHL (1934–2015), Cochrane Library CENTRAL database, EMBASE (1980–2015), Medline OVID (1946–2015), PsycINFO (1806–2015), Scopus (1966–2015), SPORTDiscus (1984–2015) and Web of Knowledge (1900–2015).		up to 7 January 2015	yes	Table 1, 2, 3	12		1	1		1	1	1	Qualitative	1	0	1
4	Can we reduce car use and, if so, how? A review of available evidence	Yes	Graham-Rowe, E., Skippon, S., Gardner, B., & Abraham, C. (2011). Can we reduce car use and, if so, how? A review of available evidence. Transportation Research Part A: Policy and Practice, 45(5), 401-418.	2011	Graham-Rowe, E., Skippon, S., Gardner, B., & Abraham, C.	systematic review	car use reduction		transport journal	Web-of-Science, Science Direct and Transportation Research Information Service (TRIS)		between 2000 and 2009	yes	Table 1, 2	47		0	1		1	1	1	Qualitative	1	0	1
5	Promoting walking and cycling as an alternative to using cars: systematic review	Yes	Ogilvie, D., Egan, M., Hamilton, V., & Petticrew, M. (2004). Promoting walking and cycling as an alternative to using cars: systematic review. Bmj, 329(7469), 763.	2004	Ogilvie, D., Egan, M., Hamilton, V., & Petticrew, M.	systematic review	active travel		medicine journal	ASSIA, CINAHL, Cochrane Library (CDSR and CCTR), Dissertation Abstracts Embase, Geobase, HMIC, HELMIS, IBSS, Index to Theses, Medline and PreMedline, PapersFirst, PsycInfo Regard, Web of Science (SCI and SSCI), Sociological Abstracts, SportDiscus, Transport		end of 2002	yes	Table 1, supplementary materials	22		1	1		1	1	1	Qualitative	1	0	0
6	Behavior Change Techniques Used to Promote Walking and Cycling: A Systematic Review	Yes	Bird, E. L., Baker, G., Mutrie, N., Ogilvie, D., Sahlqvist, S., & Powell, J. (2013). Behavior change techniques used to promote walking and cycling: a systematic review. Health psychology, 32(8), 829.	2013	Bird, E. L., Baker, G., Mutrie, N., Ogilvie, D., Sahlqvist, S., & Powell, J.	systematic review	active travel		medicine journal	Medline, PsycARTICLES, PsycINFO, the Cochrane Library, AMED, the Campbell Collaboration, EMBASE, and HMIC		different dates, until 2011	yes	supplementary materials	46 distinct interventions		1	1		1	1	1	Quantiative	1	0	1
7	Why are work travel plans effective? Comparing conclusions from narrative and meta-analytical research synthesis	Yes	Bamberg, S., & Möser, G. (2007). Why are work travel plans effective? Comparing conclusions from narrative and meta-analytical research synthesis. Transportation, 34(6), 647-666.	2007	Bamberg, S., & Möser, G.	meta-analysis	travel mode choice		transport journal		based on earlier reviews	na	na	Table 1, 2, 3. Figure 1, 2, 3	44 case studies		na	na		na	na	1	Quantiative	1	1	na
	A response to: Moser, G., & Bamberg, S. (2008). The effectiveness of soft transport policy measures: A critical assessment and meta-analysis of empirical evidence. Journal of Environmental Psychology, 28, 10-26		A response to: Moser, G., & Bamberg, S. (2008). The effectiveness of soft transport policy measures: A critical assessment and meta-analysis of empirical evidence. Journal of Environmental Psychology, 28, 10-26	2008
	Please Mr. Brog, give us your data! Reply to the comment of Wall, Brog, Erl, Ryle, & Barta on our paper "The effectiveness of soft transport policy measures: A critical assessment and meta-analysis of empirical evidence"		Please Mr. Brog, give us your data! Reply to the comment of Wall, Brog, Erl, Ryle, & Barta on our paper "The effectiveness of soft transport policy measures: A critical assessment and meta-analysis of empirical evidence"
8	The effectiveness of soft transport policy measures: A critical assessment and meta-analysis of empirical evidence	Yes	Möser, G., & Bamberg, S. (2008). The effectiveness of soft transport policy measures: A critical assessment and meta-analysis of empirical evidence. Journal of Environmental Psychology, 28(1), 10-26.	2008	Bamberg, S., & Möser, G.	meta-analysis	car use reduction		enviornment, psychology journal		based on earlier reviews	na	na	Table 1, 2. Appendices A–C.	141		1	1		1	1	1	Quantiative	1	1	na
9	A Cochrane systematic review of the effectiveness of organisational travel plans: Improving the evidence base for transport decisions	Yes	Macmillan, A. K., Hosking, J., Connor, J. L., Bullen, C., & Ameratunga, S. (2013). A Cochrane systematic review of the effectiveness of organisational travel plans: Improving the evidence base for transport decisions. Transport policy, 29, 249-256.	2013	Macmillan, A. K., Hosking, J., Connor, J. L., Bullen, C., & Ameratunga, S.	systematic review	travel behavior		transport journal	16 electronic databases		details not accessible	details not accessible	Table 1, 2	17		1	1		1	1	1	Quantiative	1	0	1
10	Travel plans for new developments: a global review	Yes	De Gruyter, C., Rose, G., Currie, G., Rye, T., & van de Graaff, E. (2018). Travel plans for new developments: a global review. Transport Reviews, 38(2), 142-161.	2018	De Gruyter, C., Rose, G., Currie, G., Rye, T., & van de Graaff, E.	review	car use	global, new developments	transport journal	Scopus, ScienceDirect, Transportation Research Information Documentation and World Transit Research			yes	Table 3, 5, 6	47		1	1		1	1	1	Qualitative	1	0	1
11	Soft Transport Policy Measures: Gaps in Knowledge	Yes	Richter, J., Friman, M., & Gärling, T. (2011). Soft transport policy measures: Gaps in knowledge. International journal of sustainable transportation, 5(4), 199-215.	2011	Richter, J., Friman, M., & Gärling, T.	narrative review			transport journal
12	The impact of voluntary travel behavior change measures - A meta-analytical comparison of quasi-experimental and experimental evidence	Yes	Bamberg, S., & Rees, J. (2017). The impact of voluntary travel behavior change measures–A meta-analytical comparison of quasi-experimental and experimental evidence. Transportation Research Part A: Policy and Practice, 100, 16-26.	2017	Bamberg, S., & Rees, J.	meta analysis	travel behavior		transport journal		based on earlier reviews, Parker et al. report (2007, pp. 31–33)	na	na	Table 1, 2, 3.	10 + 1 cases		na	na		na	na	na	Quantiative	1	1	na
13	A critical appraisal of Individualised Marketing and Travel Blending interventions in Queensland and Western Australia from 1986-2011	Yes	James, B., Burke, M., & Yen, B. T. (2017). A critical appraisal of individualised marketing and travel blending interventions in Queensland and Western Australia from 1986–2011. Travel Behaviour and Society, 8, 1-13.	2017	James, B., Burke, M., & Yen, B. T.	systematic review	travel behavior	Queensland and Western Australia	transport journal					Table 2-6. appendix			0	0					Quantiative	1	0	0
	The role of transport information in influencing travel behaviour: a literature review	Text not available	Byrne, M. (2011). The role of transport information in influencing travel behaviour: a literature review. Road & Transport Research: A Journal of Australian and New Zealand Research and Practice, 20(2), 40-49.	2011		literature review
15	Mobility management in Japan: Its development and meta-analysis of travel feedback programs	Yes	Taniguchi, A., Suzuki, H., & Fujii, S. (2007). Mobility management in Japan: Its development and meta-analysis of travel feedback programs. Transportation research record, 2021(1), 100-109.	2007	Taniguchi, A., Suzuki, H., & Fujii, S.	literature review	travel behavior	Japan	transport journal	unclear	Japan	before December 2005.		Table 2			1	1		unclear	unclear	unclear	Quantiative	1	1	0
16	Determinants of the effectiveness of travel feedback programs—a review of communicative mobility management measures for changing travel behavior in Japan	Yes	Fujii, S., & Taniguchi, A. (2006). Determinants of the effectiveness of travel feedback programs—a review of communicative mobility management measures for changing travel behaviour in Japan. Transport policy, 13(5), 339-348.	2006	Fujii, S., & Taniguchi, A.	literature review	travel behavior	Japan	transport journal	unclear	Japan	before December 2005.		Table 1-3. Fig. 3, 4	10		1	1		unclear	unclear	unclear	Quantiative	1	0	unclear
17	Infrastructure, programs, and policies to increase bicycling: An international review	Yes	Pucher, J., Dill, J., & Handy, S. (2010). Infrastructure, programs, and policies to increase bicycling: an international review. Preventive medicine, 50, S106-S125.	2010	Pucher, J., Dill, J., & Handy, S.	literature review	bike	global	medicine journal	Google, Google Scholar, TRIS Online (National Transportation Library), TRANweb, MEDLINE, PUBMED, and ISI Web of Knowledge.		studies conducted since 1990	no	Table 4	139 studies		0	1		1	1	1	Qualitative	1	0	0
18	The effect of active travel interventions conducted in work settings on driving to work: A systematic review	Yes	Petrunoff, N., Rissel, C., & Wen, L. W. (2016a). The effect of active travel interventions conducted in work settings on driving to work: A systematic review. Journal of Transport & Health, 3(1), 61–76.	2016	Petrunoff, N., Rissel, C., & Wen, L. W.	systematic review	travel behavior		transport, medicine journal	ten databases		until 2014	yes	Table2	12		1	1		1	1	1	Qualitative	1	0	1
19	Efficacy of behavioural interventions for transport behaviour change: systematic review, meta-analysis and intervention coding	Yes	Arnott, B., Rehackova, L., Errington, L., Sniehotta, F. F., Roberts, J., & Araujo-Soares, V. (2014). Efficacy of behavioural interventions for transport behaviour change: systematic review, meta-analysis and intervention coding. International journal of behavioral nutrition and physical activity, 11(1), 1-23.	2014	Arnott, B., Rehackova, L., Errington, L., Sniehotta, F. F., Roberts, J., & Araujo-Soares, V.	systematic review & meta-analysis	travel behavior		medicine journal	Applied Social Sciences Index and Abstracts (ASSIA), Ovid Embase, Ovid Medline, Ovid PsycInfo, Scopus, Sociological Abstracts, Transportation Research Information Service (TRIS), Transportation Research International Documentation (TRID), and Web of Science databases		unitl January 2013	yes	Table 1-8. Fig. 1-4	13		1	1		1	1	1	Quantiative	1	1	1
20	Encouraging the commercial sector to help employees to change their travel behaviour	Yes	Enoch, M., & Potter, S. (2003). Encouraging the commercial sector to help employees to change their travel behaviour. Transport Policy, 10(1), 51–58.	2003	Enoch, M., & Potter, S.		travel behavior		transport journal
21	Changing commuter travel behavior: Employer-initiated strategies.	Yes	Kearney, A. R.,&DeYoung, R. (1996). Changing commuter travel behavior: Employer-initiated strategies. Journal of Environmental Systems, 24, 373-393.	1996	Kearney, A. R.,&DeYoung, R.		travel behavior		enviornment journal
22	Promoting active travel to school: a systematic review (2010–2016)	Yes	Pang, B., Kubacki, K., & Rundle-Thiele, S. (2017). Promoting active travel to school: a systematic review (2010–2016). BMC public health, 17(1), 1-15.	2017	Pang, B., Kubacki, K., & Rundle-Thiele, S.	systematic review	active travel		medicine journal	Seven databases (EBSCO All databases, Emerald, ProQuest All databases, Ovid All databases, ScienceDirect, Taylor & Francis, and Web of Science)		2010–2016	yes	Table 2-6	18 interventions		1	1		1	1	1	Qualitative	1	1	1
23	EFFECTIVE TDM AT WORKSITES IN THE NETHERLANDS AND THE US." (1996).	Yes	DE VS, VERS IN NEDERLAND EN. "EFFECTIVE TDM AT WORKSITES IN THE NETHERLANDS AND THE US." (1996).	1996	DE VS, VERS	literature review, case studies	travel behavior	Netherlands, US	report
24	An Evaluation of the „Travelling to School Initiative‟ Programme Final Report - October 2010	Yes	https://www.gov.uk/government/publications/evaluation-of-the-travelling-to-school-initiative-programme-final-report	2010		case studies	travel behavior	UK	report
25	Effectiveness of active school transport interventions: a systematic review and update.	Yes	Larouche, R., Mammen, G., Rowe, D. A., & Faulkner, G. (2018). Effectiveness of active school transport interventions: a systematic review and update. BMC public health, 18(1), 1-18.	2018	Larouche, R., Mammen, G., Rowe, D. A., & Faulkner, G.	systematic review	active travel		medicine journal	PubMed, Web of Science, Cochrane, Sport Discus and National Transportation Library	school-aged children and adolescents	2010-2016.	yes	Table 1, 3	27		1	1		1	1	1	Quantiative	1	0	1
26	Systematic review of interventions for promoting active school transport.	Yes	Villa-González, E., Barranco-Ruiz, Y., Evenson, K. R., & Chillón, P. (2018). Systematic review of interventions for promoting active school transport. Preventive medicine, 111, 115-134.	2018	Villa-González, E., Barranco-Ruiz, Y., Evenson, K. R., & Chillón, P.	systematic review	active travel		medicine journal	five electronic databases: MEDLINE (PubMed), Web of Science (SCI and SSCI), SPORT Discus, the Cochrane library, and the National Transportation Library		February 2010 to December 2016	yes	Table 1, 2	23		1	1		1	1	1	Quantiative	1	0	1
27	Interventions promoting active transport to school in children: A systematic review and meta-analysis.	Yes	Jones, R. A., Blackburn, N. E., Woods, C., Byrne, M., van Nassau, F., & Tully, M. A. (2019). Interventions promoting active transport to school in children: A systematic review and meta-analysis. Preventive medicine, 123, 232-241.	2019	Jones, R. A., Blackburn, N. E., Woods, C., Byrne, M., van Nassau, F., & Tully, M. A.	systematic review & meta-analysis	active travel		medicine journal	five databases. MEDLINE, Web of Science, PsychINFO, EMBASE and TRIS	4 – 11 years old attending primary school	studies up to 30th August 2018	yes	Figure 3-5. Supplement B	17		1	1		1	1	1	Quantiative	1	1	1
28	A Scoping Review of Children and Adolescents’ Active Travel in Ireland	Yes	Costa, J., Adamakis, M., O’Brien, W., & Martins, J. (2020). A scoping review of children and adolescents’ active travel in Ireland. International journal of environmental research and public health, 17(6), 2016.	2020	Costa, J., Adamakis, M., O’Brien, W., & Martins, J.	scoping review	active travel		enviornment, medicine journal	PubMed, Scopus, Google Scholar, RIAN	Republic of Ireland	published after 2000 until 2019	yes	Table 2	19		1	1		1	1	1	Qualitative	1	0	0
29	Review of gender, socioeconomic status, and ethnic background considerations reported in active school travel intervention studies	Yes	Medeiros, A., Buttazzoni, A., Coen, S. E., Clark, A. F., Wilson, K., & Gilliland, J. (2021). Review of gender, socioeconomic status, and ethnic background considerations reported in active school travel intervention studies. Journal of Transport & Health, 21, 101035.	2021	Medeiros, A., Buttazzoni, A., Coen, S. E., Clark, A. F., Wilson, K., & Gilliland, J.	literature review	active travel		transport, medicine journal	Six databases (BIOSIS Previews, GeoBase, PubMed, SCOPUS, SPORTDiscus, and Web of Science)	aged 5–19 years	up to and including December 2019	yes	Table 1, 3	69		1	1		1	1	1	0	0	0	1
30	The Implementation and Effectiveness of Transport Demand Management Measures: An International Perspective	Text not available	Rye, Tom, and Stephen Ison. The implementation and effectiveness of transport demand management measures: An international perspective. Routledge, 2016.	2016	Rye, Tom, and Stephen Ison.		travel behavior
31	School-Based Interventions for Promoting Physical Activity Using Games and Gamification: A Systematic Review Protocol	Protocol only	Saucedo-Araujo, R. G., Chillón, P., Pérez-López, I. J., & Barranco-Ruiz, Y. (2020). School-Based Interventions for Promoting Physical Activity Using Games and Gamification: A Systematic Review Protocol. International journal of environmental research and public health, 17(14), 5186.	2020	Saucedo-Araujo, R. G., Chillón, P., Pérez-López, I. J., & Barranco-Ruiz, Y.		active travel		enviornment, medicine journal
32	Health co-benefits of climate change mitigation policies in the transport sector.	Yes	Shaw, C., Hales, S., Howden-Chapman, P., & Edwards, R. (2014). Health co-benefits of climate change mitigation policies in the transport sector. Nature Climate Change, 4(6), 427-433.	2014	Shaw, C., Hales, S., Howden-Chapman, P., & Edwards, R.	systematic review			enviornment journal	12 databases	studies with any type of health or inequality outcome	1 January 1992 to 31 March 2011.	yes	Table 1	22		1	1		1	1	1	Quantiative	1	0	1
33	Interventions to promote cycling: systematic review.	Yes	Yang, L., Sahlqvist, S., McMinn, A., Griffin, S. J., & Ogilvie, D. (2010). Interventions to promote cycling: systematic review. Bmj, 341, c5293.	2010	Yang, L., Sahlqvist, S., McMinn, A., Griffin, S. J., & Ogilvie, D.	systematic review	bike		medicine journal	13 electronic databases (AgeLine, CINAHL, Cochrane Library, Digital Dissertations, Embase, ERIC, Medline, PsycARTICLES, PsycINFO, TRIS, Sociological Abstracts, SportDiscus, and Web of Knowledge).	limited to terms for cycling	completed our search in January 2010	yes	Table 1-4	25		1	1		1	1	1	Quantiative	1	0	0
34	Healthy urban environments for children and young people: a systematic review of intervention studies.	Not	Audrey, S., & Batista-Ferrer, H. (2015). Healthy urban environments for children and young people: a systematic review of intervention studies. Health & Place, 36, 97-117.	2015	Audrey, S., & Batista-Ferrer, H.	systematic review			medicine journal
35	Active school travel intervention methodologies in North America: a systematic review.	Yes	Buttazzoni, A. N., Van Kesteren, E. S., Shah, T. I., & Gilliland, J. A. (2018). Active school travel intervention methodologies in North America: a systematic review. American journal of preventive medicine, 55(1), 115-124.	2018	Buttazzoni, A. N., Van Kesteren, E. S., Shah, T. I., & Gilliland, J. A.	systematic review	active travel		medicine journal	six databases (BIOSIS Previews, GeoBase, PubMed, SCOPUS, SPORTDiscus, Web of Science)	North American setting	as of March 2017)	yes	Table 1	21		1	1		1	1	1	na	0	0	1
14	Interventions promoting active transport to school in children: A systematic review and meta-analysis.	Yes	Jones, R. A., Blackburn, N. E., Woods, C., Byrne, M., van Nassau, F., & Tully, M. A. (2019). Interventions promoting active transport to school in children: A systematic review and meta-analysis. Preventive medicine, 123, 232-241.	2019	Jones, R. A., Blackburn, N. E., Woods, C., Byrne, M., van Nassau, F., & Tully, M. A.	systematic review and meta-analysis	active travel		medicine journal
36	Making travel plans work: research report (former), Department for Transport, Local Government and the Regions (DTLR), London	Yes	Cairns, S., Davies, A., Newson, C., Swiderska, C. (2002). Making travel plans work: research report (former), Department for Transport, Local Government and the Regions (DTLR), London	2002	Cairns, S., Davies, A., Newson, C., Swiderska, C.	case studies	travel behavior		report	na	all local authorities in England and Wales	na	na	Table 3.2.1, 4.1.1, 4.2.1, 4.3.1, 4.3.2. Figure 4.2.1, 4.3.1	20 case studies		0	1		1	1	1	Quantiative	1	0	0
37	‘Smarter choices—changing the way we travel’. (Final report of the research project: the influence of soft factor interventions on travel demand. Research report for the Department for Transport.)	Yes	Cairns, S., Sloman, L., Newson, C., Anable, J., Kirkbride, A., Goodwin, P. (2004). ‘Smarter choices—changing the way we travel’. (Final report of the research project: the influence of soft factor interventions on travel demand. Research report for the Department for Transport.), London. Retrieved 1 December 2005, from http://www.dft.gov.uk/stellent/groups/dft_susttravel/documents/page/dft_susttr…	2004	Cairns, S., Sloman, L., Newson, C., Anable, J., Kirkbride, A., Goodwin, P.	case studies	travel behavior		report	na		na	na					1					Quantiative	1	0	0
38	A comparative evaluation of large-scale personal travel planning projects in England.	Yes	Chatterjee, K., 2009. A comparative evaluation of large-scale personal travel planning projects in England. Transp. Policy 16, 293–305.	2009	Chatterjee, K.	case studies	travel behavior		transport journal	eight case study areas in England		na	na		14			1					Quantiative	1	0	1
39	Travel Plans and Their Application to New Developments. Travel Plans for New Residential Developments: Insights from Theory and Practice	Yes	De Gruyter, C. (2017). Travel Plans and Their Application to New Developments. Travel Plans for New Residential Developments: Insights from Theory and Practice, 9-39.	2017	De Gruyter, C.	literature review	travel behavior		thesis		New Developments			Table 2.5, 2.6				1					Qualitative	1	0
40	Interventions aiming to promote active commuting in children and adolescents: An evaluation from a sex/gender perspective	Yes	Marzi, I., Emmerling, S., Demetriou, Y., Bucksch, J., Schulze, C., Brindley, C., & Reimers, A. K. (2020). Interventions aiming to promote active commuting in children and adolescents: An evaluation from a sex/gender perspective. Frontiers in sports and active living, 184.	2020	Marzi, I., Emmerling, S., Demetriou, Y., Bucksch, J., Schulze, C., Brindley, C., & Reimers, A. K.	systematic review	active travel		medicine journal	11 electronic databases [Cochrane Central Register of Trials (CENTRAL); U.S. National Library of Medicine (clinicalTrials.gov); Ovid Embase; Epistemonikos; EBSCO Eric; WHO International Clinical Trails Registry Platform (ICTRP); Ovid Medline; ProQuest Dissertations & These Global; EBSCO PsycINFO; EBSCO SPORTDiscus; Clarivate Web of Science]	healthy children and adolescents within the average age range of 3–19 years	after 2000 until 01/08/2018		Table 1-3	76		1	0		1	1	1		0	0	1
41	Take up and effectiveness of travel plans and travel awareness campaigns.	Yes	Gleave, Steer Davies. Take-up and effectiveness of travel plans and travel awareness campaigns. Steer Davies Gleave. Firm, 2001.	2001	Gleave, Steer Davies.	case studies	travel behavior		report	na	na	na	na

## Sheet: key
#
Article name
Ref
y.o.p
Authors
Lit review type (based on Haddaway & Macura 2018)
Travel behavior or Mode type (if specified)
settings qualifications
article type
Data bases searched
search criteia
Search date/period covered
Search terms included (yes or no; #)
key table or figure
papers included in the review
Study description
Intervention description
Selection bias		Systematic search across a suite of resources rather than selection of studies with which authors are already familiar
comprehensiveness bias		Comprehensive searching across multiple bibliographic databases	Comprehensive searching across multiple bibliographic databases and sources of grey literature, searches in multiple relevant languages
Protocol & transparency		An a priori protocol sets out the planned methods for the review in detail and is published (and preferably peerreviewed by subject and methodology experts) prior to commencing the review
Quantiative or qualitative
Outcome reporting
Meta-analysis
Critical analysis
